# Supplementary material for: Cluster Sampling Bias in Government-Sponsored Evaluations: A Correlational Study of Employment and Welfare Pilots in England
Source: PLoS One. 2016 Aug 9;11(8):e0160652. doi: 10.1371/journal.pone.0160652 (PMC4978397; doi:10.1371/journal.pone.0160652)
Supplement: S3 Table — (XLSX) [file pone.0160652.s003.xlsx]

## Sheet: Sheet1
PROGRAMME	JCP_DISTRICT	EFFECTIVE_PILOT_SITE	BENEFI_ CLAIMS_%	ABSOLUT_PERF	ABSOLUT_RANK	RELATIVE_RANK	REGION	NORTH	MID	LON	SOUTH	POP_2007	HECTARES	POP_DENSITY	WK_AGE_POP_000	CUMULATED_NB_OF_PILOTS	PATHFINDER	JCP_LEAD	RELATIVE_x_PATHF	RELATIVE_x_JCPLead	ETHNIC_%	PROG_ETHNIC	PROGETHNIC_x_ETHNIC_%	ISLP_2003_%	PROG_LP	PROGLP_x_ISLP	IB_2003_%	PROG_DP	PROGDP_x_IB	ABSOLUT_x_PATHF	ABSOLUT_x_JCPLead
Acces to Work	Bedfordshire and Hertfordshire	0	2	19.81	20		South	0	0	0	1	1221	288	0.4	10.06	7	0	0			15	0	0	1.55467	0	0	3.32505	1	3.32505	0	0
Acces to Work	Birmingham and Solihull	0	6.9	13.46	38		Midlands	0	1	0	0	1834	45	4.1	7.242	15	0	0			29	0	0	0.7636	0	0	6.24827	1	6.24827	0	0
Acces to Work	Black Country	0	5.4	20.22	18		Midlands	0	1	0	0	1636	36	4.5	6.501	12	0	0			19	0	0	5.12844	0	0	4.99923	1	4.99923	0	0
Acces to Work	Cambridgeshire and Suffolk	0	2	17.37	28		South	0	0	0	1	1639	719	0.2	8.607	5	0	0			11	0	0	1.31637	0	0	4.89601	1	4.89601	0	0
Acces to Work	Cheshire, Halton and Warrington	0	2.2	24.52	3		North	1	0	0	0	1654	234	0.7	6.067	4	0	0			4	0	0	3.57013	0	0	9.15774	1	9.15774	0	0
Acces to Work	Coventry and Warwickshire	1	2.9	18.34	24		Midlands	0	1	0	0	734	207	0.4	5.056	7	0	0			14	0	0	1.17089	0	0	7.97666	1	7.97666	0	0
Acces to Work	Cumbria and Lancashire	0	2.3	21.08	12		North	1	0	0	0	1212	984	0.1	11.59	10	0	0			8	0	0	1.22174	0	0	2.47714	1	2.47714	0	0
Acces to Work	Derbyshire	0	2.6	17.58	26		Midlands	0	1	0	0	825	262	0.3	5.96	8	0	0			7	0	0	1.04362	0	0	12.0721	1	12.0721	0	0
Acces to Work	Devon and Cornwall	0	1.7	20.72	15		South	0	0	0	1	684	1027	0.1	9.404	12	0	0			5	0	0	2.47554	0	0	3.83879	1	3.83879	0	0
Acces to Work	Dorset and Somerset	0	1.3	22.91	7		South	0	0	0	1	841	610	0.1	6.932	7	0	0			6	0	0	2.75534	0	0	6.36757	1	6.36757	0	0
Acces to Work	Essex	1	2	20.83	14		South	0	0	0	1	879	367	0.2	9.899	8	0	0			10	0	0	1.16173	0	0	3.55793	1	3.55793	0	0
Acces to Work	Gloucestershire, Wiltshire and Swindon	0	1.5	21.03	13		South	0	0	0	1	847	614	0.1	7.24	4	0	0			7	0	0	2.09392	0	0	8.88536	1	8.88536	0	0
Acces to Work	Hampshire and Isle of Wight	0	1.6	24.61	2		South	0	0	0	1	706	415	0.2	11.11	5	0	0			8	0	0	2.75248	0	0	4.12781	1	4.12781	0	0
Acces to Work	Kent	0	2.2	23.01	6		South	0	0	0	1	1380	374	0.4	9.63	6	0	0			9	0	0	1.26168	0	0	5.66978	1	5.66978	0	0
Acces to Work	Leicestershire, Rutland and Northamptonshire	1	2.5	17.47	27		Midlands	0	1	0	0	706	490	0.1	9.88	9	0	0			14	0	0	2.51518	0	0	4.81174	1	4.81174	0	0
Acces to Work	London (Brent, Harrow and Hillingdon)	0	3.5	13.03	40		London	0	0	1	0	900	21	4.3	4.681	7	0	0			39	0	0	2.62551	0	0	7.93207	1	7.93207	0	0
Acces to Work	London (Central)	1	3.6	13.57	37		London	0	0	1	0	1879	7	26.8	5.527	9	0	0			29	0	0	3.56432	0	0	9.81907	1	9.81907	0	0
Acces to Work	London (City and East)	0	7.3	15.28	35		London	0	0	1	0	1179	8	14.7	4.534	13	0	0			43	0	0	2.74151	0	0	23.7583	1	23.7583	0	0
Acces to Work	London (Lambeth, Southwark and Wandsworth)	0	4.3	13.42	39		London	0	0	1	0	1354	9	15	5.698	8	0	0			29	0	0	4.48403	0	0	14.0347	1	14.0347	0	0
Acces to Work	London (North East)	1	3.8	16.72	30		London	0	0	1	0	834	24	3.5	5.397	7	0	0			31	0	0	3.81323	0	0	7.99333	1	7.99333	0	0
Acces to Work	London (North)	0	4.5	14.96	36		London	0	0	1	0	1687	20	8.4	5.391	8	0	0			31	0	0	5.76145	0	0	15.4183	1	15.4183	0	0
Acces to Work	London (South East)	0	3.8	22.27	9		London	0	0	1	0	1119	14	8	4.467	11	0	0			26	0	0	3.98702	0	0	14.1639	1	14.1639	0	0
Acces to Work	London (South)	0	2	16.86	29		London	0	0	1	0	1748	41	4.3	8.583	8	0	0			23	0	0	4.71513	0	0	6.48841	1	6.48841	0	0
Acces to Work	London (West)	0	3.3	18.3	25		London	0	0	1	0	781	13	6	4.73	6	0	0			34	0	0	3.64693	0	0	22.2896	1	22.2896	0	0
Acces to Work	Manchester (Central)	1	4	19.47	21		North	1	0	0	0	1084	32	3.4	5.512	12	0	0			18	0	0	2.39478	0	0	9.082	1	9.082	0	0
Acces to Work	Manchester (East and West)	1	3.1	23.31	5		North	1	0	0	0	1458	96	1.5	10.233	10	0	0			11	0	0	3.41933	0	0	6.24059	1	6.24059	0	0
Acces to Work	Marches	0	2	22.8	8		Midlands	0	1	0	0	1297	741	0.2	7.062	9	0	0			6	0	0	2.18918	0	0	15.6938	1	15.6938	0	0
Acces to Work	Merseyside	0	5.5	15.66	34		North	1	0	0	0	1000	64	1.6	8.258	12	0	0			6	0	0	1.61298	0	0	4.73965	1	4.73965	0	0
Acces to Work	Norfolk	1	2.3	16.5	31		South	0	0	0	1	1061	537	0.2	4.791	3	0	0			7	0	0	0.30683	0	0	11.2169	1	11.2169	0	0
Acces to Work	North East Yorkshire and the Humber	0	2.8	20.27	17		North	1	0	0	0	833	1183	0.1	10.006	5	0	0			7	0	0	2.29562	0	0	2.78133	1	2.78133	0	0
Acces to Work	Northumbria	1	3.1	19.83	19		North	1	0	0	0	1944	542	0.4	6.841	17	0	0			7	0	0	2.70136	0	0	11.0072	1	11.0072	0	0
Acces to Work	Nottinghamshire and Lincolnshire	1	2.7	20.31	16		Midlands	0	1	0	0	2622	808	0.3	10.397	11	0	0			9	0	0	0.89353	0	0	3.2721	1	3.2721	0	0
Acces to Work	South Tyne and Wear Valley	0	4.3	24.65	1		North	1	0	0	0	993	236	0.4	4.802	9	0	0			5	0	0	2.4115	0	0	13.3132	1	13.3132	0	0
Acces to Work	South Yorkshire	1	3.5	19.45	22		North	1	0	0	0	1652	155	1.1	7.845	11	0	0			10	0	0	2.07266	0	0	14.3531	1	14.3531	0	0
Acces to Work	Staffordshire	0	2.2	24.09	4		Midlands	0	1	0	0	656	271	0.2	6.501	3	0	0			7	0	0	1.66897	0	0	6.38517	1	6.38517	0	0
Acces to Work	Surrey and Sussex	1	1.5	15.76	33		South	0	0	0	1	2168	544	0.4	15.376	8	0	0			10	0	0	1.09781	0	0	3.7526	1	3.7526	0	0
Acces to Work	Tees Valley	0	4.8	19.02	23		North	1	0	0	0	1226	79	1.6	3.984	8	0	0			6	0	0	4.10392	0	0	18.6145	1	18.6145	0	0
Acces to Work	Thames Valley (Berks, Bucks, Oxfs)	0	1.4	16.17	32		South	0	0	0	1	1052	574	0.2	13.476	8	0	0			14	0	0	2.68106	0	0	3.32072	1	3.32072	0	0
Acces to Work	West Of England	1	1.7	21.27	11		South	0	0	0	1	1674	133	1.3	6.329	6	0	0			10	0	0	1.83441	0	0	5.71022	1	5.71022	0	0
Acces to Work	West Yorkshire	0	3.3	22.11	10		North	1	0	0	0	2180	203	1.1	13.065	16	0	0			16	0	0	1.41906	0	0	2.33295	1	2.33295	0	0
Action Teams for Jobs	Bedfordshire and Hertfordshire	0	2	14.79	13		South	0	0	0	1	1221	288	0.4	10.06	4	1	0			15	0	0	1.55467	0	0	3.32505	0	0	13	0
Action Teams for Jobs	Birmingham and Solihull	0	6.9	9.84	40		Midlands	0	1	0	0	1834	45	4.1	7.242	4	1	0			29	0	0	0.7636	0	0	6.24827	0	0	40	0
Action Teams for Jobs	Black Country	0	5.4	11.66	36		Midlands	0	1	0	0	1636	36	4.5	6.501	3	1	0			19	0	0	5.12844	0	0	4.99923	0	0	36	0
Action Teams for Jobs	Cambridgeshire and Suffolk	0	2	14.27	16		South	0	0	0	1	1639	719	0.2	8.607	3	1	0			11	0	0	1.31637	0	0	4.89601	0	0	16	0
Action Teams for Jobs	Cheshire, Halton and Warrington	0	2.2	15.86	5		North	1	0	0	0	1654	234	0.7	6.067	3	1	0			4	0	0	3.57013	0	0	9.15774	0	0	5	0
Action Teams for Jobs	Coventry and Warwickshire	0	2.9	13.03	26		Midlands	0	1	0	0	734	207	0.4	5.056	4	1	0			14	0	0	1.17089	0	0	7.97666	0	0	26	0
Action Teams for Jobs	Cumbria and Lancashire	0	2.3	16.41	3		North	1	0	0	0	1212	984	0.1	11.59	3	1	0			8	0	0	1.22174	0	0	2.47714	0	0	3	0
Action Teams for Jobs	Derbyshire	0	2.6	13.81	20		Midlands	0	1	0	0	825	262	0.3	5.96	3	1	0			7	0	0	1.04362	0	0	12.0721	0	0	20	0
Action Teams for Jobs	Devon and Cornwall	0	1.7	15.52	7		South	0	0	0	1	684	1027	0.1	9.404	7	1	0			5	0	0	2.47554	0	0	3.83879	0	0	7	0
Action Teams for Jobs	Dorset and Somerset	0	1.3	15.43	8		South	0	0	0	1	841	610	0.1	6.932	3	1	0			6	0	0	2.75534	0	0	6.36757	0	0	8	0
Action Teams for Jobs	Essex	0	2	14.05	19		South	0	0	0	1	879	367	0.2	9.899	3	1	0			10	0	0	1.16173	0	0	3.55793	0	0	19	0
Action Teams for Jobs	Gloucestershire, Wiltshire and Swindon	0	1.5	14.24	17		South	0	0	0	1	847	614	0.1	7.24	2	1	0			7	0	0	2.09392	0	0	8.88536	0	0	17	0
Action Teams for Jobs	Hampshire and Isle of Wight	0	1.6	14.41	15		South	0	0	0	1	706	415	0.2	11.11	2	1	0			8	0	0	2.75248	0	0	4.12781	0	0	15	0
Action Teams for Jobs	Kent	1	2.2	14.09	18		South	0	0	0	1	1380	374	0.4	9.63	1	1	0			9	0	0	1.26168	0	0	5.66978	0	0	18	0
Action Teams for Jobs	Leicestershire, Rutland and Northamptonshire	0	2.5	14.86	10		Midlands	0	1	0	0	706	490	0.1	9.88	3	1	0			14	0	0	2.51518	0	0	4.81174	0	0	10	0
Action Teams for Jobs	London (Brent, Harrow and Hillingdon)	0	3.5	12.02	33		London	0	0	1	0	900	21	4.3	4.681	1	1	0			39	0	0	2.62551	0	0	7.93207	0	0	33	0
Action Teams for Jobs	London (Central)	0	3.6	10.24	39		London	0	0	1	0	1879	7	26.8	5.527	3	1	0			29	0	0	3.56432	0	0	9.81907	0	0	39	0
Action Teams for Jobs	London (City and East)	0	7.3	12.08	32		London	0	0	1	0	1179	8	14.7	4.534	5	1	0			43	0	0	2.74151	0	0	23.7583	0	0	32	0
Action Teams for Jobs	London (Lambeth, Southwark and Wandsworth)	0	4.3	10.72	37		London	0	0	1	0	1354	9	15	5.698	2	1	0			29	0	0	4.48403	0	0	14.0347	0	0	37	0
Action Teams for Jobs	London (North East)	0	3.8	12.19	30		London	0	0	1	0	834	24	3.5	5.397	3	1	0			31	0	0	3.81323	0	0	7.99333	0	0	30	0
Action Teams for Jobs	London (North)	0	4.5	10.6	38		London	0	0	1	0	1687	20	8.4	5.391	2	1	0			31	0	0	5.76145	0	0	15.4183	0	0	38	0
Action Teams for Jobs	London (South East)	0	3.8	16.72	1		London	0	0	1	0	1119	14	8	4.467	3	1	0			26	0	0	3.98702	0	0	14.1639	0	0	1	0
Action Teams for Jobs	London (South)	0	2	12.5	28		London	0	0	1	0	1748	41	4.3	8.583	2	1	0			23	0	0	4.71513	0	0	6.48841	0	0	28	0
Action Teams for Jobs	London (West)	0	3.3	13.05	25		London	0	0	1	0	781	13	6	4.73	2	1	0			34	0	0	3.64693	0	0	22.2896	0	0	25	0
Action Teams for Jobs	Manchester (Central)	0	4	12.32	29		North	1	0	0	0	1084	32	3.4	5.512	2	1	0			18	0	0	2.39478	0	0	9.082	0	0	29	0
Action Teams for Jobs	Manchester (East and West)	0	3.1	16.32	4		North	1	0	0	0	1458	96	1.5	10.233	4	1	0			11	0	0	3.41933	0	0	6.24059	0	0	4	0
Action Teams for Jobs	Marches	0	2	16.54	2		Midlands	0	1	0	0	1297	741	0.2	7.062	6	1	0			6	0	0	2.18918	0	0	15.6938	0	0	2	0
Action Teams for Jobs	Merseyside	0	5.5	11.81	34		North	1	0	0	0	1000	64	1.6	8.258	5	1	0			6	0	0	1.61298	0	0	4.73965	0	0	34	0
Action Teams for Jobs	Norfolk	0	2.3	13.02	27		South	0	0	0	1	1061	537	0.2	4.791	1	1	0			7	0	0	0.30683	0	0	11.2169	0	0	27	0
Action Teams for Jobs	North East Yorkshire and the Humber	0	2.8	14.81	11		North	1	0	0	0	833	1183	0.1	10.006	3	1	0			7	0	0	2.29562	0	0	2.78133	0	0	11	0
Action Teams for Jobs	Northumbria	0	3.1	11.68	35		North	1	0	0	0	1944	542	0.4	6.841	7	1	0			7	0	0	2.70136	0	0	11.0072	0	0	35	0
Action Teams for Jobs	Nottinghamshire and Lincolnshire	0	2.7	13.32	23		Midlands	0	1	0	0	2622	808	0.3	10.397	5	1	0			9	0	0	0.89353	0	0	3.2721	0	0	23	0
Action Teams for Jobs	South Tyne and Wear Valley	1	4.3	15.27	9		North	1	0	0	0	993	236	0.4	4.802	5	1	0			5	0	0	2.4115	0	0	13.3132	0	0	9	0
Action Teams for Jobs	South Yorkshire	0	3.5	13.73	22		North	1	0	0	0	1652	155	1.1	7.845	6	1	0			10	0	0	2.07266	0	0	14.3531	0	0	22	0
Action Teams for Jobs	Staffordshire	0	2.2	14.8	12		Midlands	0	1	0	0	656	271	0.2	6.501	1	1	0			7	0	0	1.66897	0	0	6.38517	0	0	12	0
Action Teams for Jobs	Surrey and Sussex	0	1.5	13.31	24		South	0	0	0	1	2168	544	0.4	15.376	4	1	0			10	0	0	1.09781	0	0	3.7526	0	0	24	0
Action Teams for Jobs	Tees Valley	0	4.8	12.12	31		North	1	0	0	0	1226	79	1.6	3.984	4	1	0			6	0	0	4.10392	0	0	18.6145	0	0	31	0
Action Teams for Jobs	Thames Valley (Berks, Bucks, Oxfs)	0	1.4	14.53	14		South	0	0	0	1	1052	574	0.2	13.476	4	1	0			14	0	0	2.68106	0	0	3.32072	0	0	14	0
Action Teams for Jobs	West Of England	0	1.7	15.78	6		South	0	0	0	1	1674	133	1.3	6.329	3	1	0			10	0	0	1.83441	0	0	5.71022	0	0	6	0
Action Teams for Jobs	West Yorkshire	0	3.3	13.8	21		North	1	0	0	0	2180	203	1.1	13.065	3	1	0			16	0	0	1.41906	0	0	2.33295	0	0	21	0
Adult Learning Option (ALO)	Bedfordshire and Hertfordshire	0	2	15.62	18		South	0	0	0	1	1221	288	0.4	10.06	8	0	1			15	0	0	1.55467	0	0	3.32505	0	0	0	18
Adult Learning Option (ALO)	Birmingham and Solihull	1	6.9	10.2	40		Midlands	0	1	0	0	1834	45	4.1	7.242	15	0	1			29	0	0	0.7636	0	0	6.24827	0	0	0	40
Adult Learning Option (ALO)	Black Country	0	5.4	15.54	19		Midlands	0	1	0	0	1636	36	4.5	6.501	13	0	1			19	0	0	5.12844	0	0	4.99923	0	0	0	19
Adult Learning Option (ALO)	Cambridgeshire and Suffolk	0	2	13.94	26		South	0	0	0	1	1639	719	0.2	8.607	5	0	1			11	0	0	1.31637	0	0	4.89601	0	0	0	26
Adult Learning Option (ALO)	Cheshire, Halton and Warrington	0	2.2	16.68	12		North	1	0	0	0	1654	234	0.7	6.067	5	0	1			4	0	0	3.57013	0	0	9.15774	0	0	0	12
Adult Learning Option (ALO)	Coventry and Warwickshire	0	2.9	13.68	31		Midlands	0	1	0	0	734	207	0.4	5.056	8	0	1			14	0	0	1.17089	0	0	7.97666	0	0	0	31
Adult Learning Option (ALO)	Cumbria and Lancashire	0	2.3	16.79	10		North	1	0	0	0	1212	984	0.1	11.59	12	0	1			8	0	0	1.22174	0	0	2.47714	0	0	0	10
Adult Learning Option (ALO)	Derbyshire	0	2.6	13.76	28		Midlands	0	1	0	0	825	262	0.3	5.96	8	0	1			7	0	0	1.04362	0	0	12.0721	0	0	0	28
Adult Learning Option (ALO)	Devon and Cornwall	0	1.7	16.26	13		South	0	0	0	1	684	1027	0.1	9.404	12	0	1			5	0	0	2.47554	0	0	3.83879	0	0	0	13
Adult Learning Option (ALO)	Dorset and Somerset	0	1.3	18.5	3		South	0	0	0	1	841	610	0.1	6.932	8	0	1			6	0	0	2.75534	0	0	6.36757	0	0	0	3
Adult Learning Option (ALO)	Essex	0	2	16.73	11		South	0	0	0	1	879	367	0.2	9.899	9	0	1			10	0	0	1.16173	0	0	3.55793	0	0	0	11
Adult Learning Option (ALO)	Gloucestershire, Wiltshire and Swindon	1	1.5	14.93	22		South	0	0	0	1	847	614	0.1	7.24	4	0	1			7	0	0	2.09392	0	0	8.88536	0	0	0	22
Adult Learning Option (ALO)	Hampshire and Isle of Wight	0	1.6	20.08	1		South	0	0	0	1	706	415	0.2	11.11	5	0	1			8	0	0	2.75248	0	0	4.12781	0	0	0	1
Adult Learning Option (ALO)	Kent	0	2.2	17.24	8		South	0	0	0	1	1380	374	0.4	9.63	6	0	1			9	0	0	1.26168	0	0	5.66978	0	0	0	8
Adult Learning Option (ALO)	Leicestershire, Rutland and Northamptonshire	0	2.5	13.85	27		Midlands	0	1	0	0	706	490	0.1	9.88	10	0	1			14	0	0	2.51518	0	0	4.81174	0	0	0	27
Adult Learning Option (ALO)	London (Brent, Harrow and Hillingdon)	0	3.5	13.33	33		London	0	0	1	0	900	21	4.3	4.681	7	0	1			39	0	0	2.62551	0	0	7.93207	0	0	0	33
Adult Learning Option (ALO)	London (Central)	1	3.6	11.81	39		London	0	0	1	0	1879	7	26.8	5.527	10	0	1			29	0	0	3.56432	0	0	9.81907	0	0	0	39
Adult Learning Option (ALO)	London (City and East)	0	7.3	11.89	38		London	0	0	1	0	1179	8	14.7	4.534	13	0	1			43	0	0	2.74151	0	0	23.7583	0	0	0	38
Adult Learning Option (ALO)	London (Lambeth, Southwark and Wandsworth)	1	4.3	12.14	37		London	0	0	1	0	1354	9	15	5.698	8	0	1			29	0	0	4.48403	0	0	14.0347	0	0	0	37
Adult Learning Option (ALO)	London (North East)	0	3.8	13.76	29		London	0	0	1	0	834	24	3.5	5.397	8	0	1			31	0	0	3.81323	0	0	7.99333	0	0	0	29
Adult Learning Option (ALO)	London (North)	0	4.5	12.91	35		London	0	0	1	0	1687	20	8.4	5.391	8	0	1			31	0	0	5.76145	0	0	15.4183	0	0	0	35
Adult Learning Option (ALO)	London (South East)	0	3.8	19.61	2		London	0	0	1	0	1119	14	8	4.467	12	0	1			26	0	0	3.98702	0	0	14.1639	0	0	0	2
Adult Learning Option (ALO)	London (South)	0	2	14	25		London	0	0	1	0	1748	41	4.3	8.583	9	0	1			23	0	0	4.71513	0	0	6.48841	0	0	0	25
Adult Learning Option (ALO)	London (West)	0	3.3	15.85	17		London	0	0	1	0	781	13	6	4.73	6	0	1			34	0	0	3.64693	0	0	22.2896	0	0	0	17
Adult Learning Option (ALO)	Manchester (Central)	0	4	16.2	15		North	1	0	0	0	1084	32	3.4	5.512	13	0	1			18	0	0	2.39478	0	0	9.082	0	0	0	15
Adult Learning Option (ALO)	Manchester (East and West)	1	3.1	17.08	9		North	1	0	0	0	1458	96	1.5	10.233	11	0	1			11	0	0	3.41933	0	0	6.24059	0	0	0	9
Adult Learning Option (ALO)	Marches	0	2	17.61	6		Midlands	0	1	0	0	1297	741	0.2	7.062	10	0	1			6	0	0	2.18918	0	0	15.6938	0	0	0	6
Adult Learning Option (ALO)	Merseyside	0	5.5	12.37	36		North	1	0	0	0	1000	64	1.6	8.258	12	0	1			6	0	0	1.61298	0	0	4.73965	0	0	0	36
Adult Learning Option (ALO)	Norfolk	0	2.3	12.92	34		South	0	0	0	1	1061	537	0.2	4.791	4	0	1			7	0	0	0.30683	0	0	11.2169	0	0	0	34
Adult Learning Option (ALO)	North East Yorkshire and the Humber	0	2.8	14.55	23		North	1	0	0	0	833	1183	0.1	10.006	5	0	1			7	0	0	2.29562	0	0	2.78133	0	0	0	23
Adult Learning Option (ALO)	Northumbria	0	3.1	15.49	20		North	1	0	0	0	1944	542	0.4	6.841	19	0	1			7	0	0	2.70136	0	0	11.0072	0	0	0	20
Adult Learning Option (ALO)	Nottinghamshire and Lincolnshire	0	2.7	15.92	16		Midlands	0	1	0	0	2622	808	0.3	10.397	12	0	1			9	0	0	0.89353	0	0	3.2721	0	0	0	16
Adult Learning Option (ALO)	South Tyne and Wear Valley	0	4.3	18	4		North	1	0	0	0	993	236	0.4	4.802	9	0	1			5	0	0	2.4115	0	0	13.3132	0	0	0	4
Adult Learning Option (ALO)	South Yorkshire	0	3.5	15.43	21		North	1	0	0	0	1652	155	1.1	7.845	12	0	1			10	0	0	2.07266	0	0	14.3531	0	0	0	21
Adult Learning Option (ALO)	Staffordshire	0	2.2	17.93	5		Midlands	0	1	0	0	656	271	0.2	6.501	4	0	1			7	0	0	1.66897	0	0	6.38517	0	0	0	5
Adult Learning Option (ALO)	Surrey and Sussex	0	1.5	13.59	32		South	0	0	0	1	2168	544	0.4	15.376	10	0	1			10	0	0	1.09781	0	0	3.7526	0	0	0	32
Adult Learning Option (ALO)	Tees Valley	0	4.8	14.52	24		North	1	0	0	0	1226	79	1.6	3.984	8	0	1			6	0	0	4.10392	0	0	18.6145	0	0	0	24
Adult Learning Option (ALO)	Thames Valley (Berks, Bucks, Oxfs)	0	1.4	13.75	30		South	0	0	0	1	1052	574	0.2	13.476	9	0	1			14	0	0	2.68106	0	0	3.32072	0	0	0	30
Adult Learning Option (ALO)	West Of England	0	1.7	17.32	7		South	0	0	0	1	1674	133	1.3	6.329	7	0	1			10	0	0	1.83441	0	0	5.71022	0	0	0	7
Adult Learning Option (ALO)	West Yorkshire	0	3.3	16.24	14		North	1	0	0	0	2180	203	1.1	13.065	17	0	1			16	0	0	1.41906	0	0	2.33295	0	0	0	14
Adults Facing Chronic Exclusion	Bedfordshire and Hertfordshire	1	2	14.32	17	21	South	0	0	0	1	1221	288	0.4	10.06	8	0	0	0	0	15	0	0	1.55467	0	0	3.32505	0	0	0	0
Adults Facing Chronic Exclusion	Birmingham and Solihull	0	6.9	9.74	40	10	Midlands	0	1	0	0	1834	45	4.1	7.242	19	0	0	0	0	29	0	0	0.7636	0	0	6.24827	0	0	0	0
Adults Facing Chronic Exclusion	Black Country	0	5.4	12.06	36	46	Midlands	0	1	0	0	1636	36	4.5	6.501	14	0	0	0	0	19	0	0	5.12844	0	0	4.99923	0	0	0	0
Adults Facing Chronic Exclusion	Cambridgeshire and Suffolk	0	2	13.44	26	8	South	0	0	0	1	1639	719	0.2	8.607	5	0	0	0	0	11	0	0	1.31637	0	0	4.89601	0	0	0	0
Adults Facing Chronic Exclusion	Cheshire, Halton and Warrington	1	2.2	15.25	11	43	North	1	0	0	0	1654	234	0.7	6.067	5	0	0	0	0	4	0	0	3.57013	0	0	9.15774	0	0	0	0
Adults Facing Chronic Exclusion	Coventry and Warwickshire	0	2.9	12.52	30	9	Midlands	0	1	0	0	734	207	0.4	5.056	9	0	0	0	0	14	0	0	1.17089	0	0	7.97666	0	0	0	0
Adults Facing Chronic Exclusion	Cumbria and Lancashire	0	2.3	16.25	5		North	1	0	0	0	1212	984	0.1	11.59	13	0	0			8	0	0	1.22174	0	0	2.47714	0	0	0	0
Adults Facing Chronic Exclusion	Derbyshire	0	2.6	13.69	23	6	Midlands	0	1	0	0	825	262	0.3	5.96	8	0	0	0	0	7	0	0	1.04362	0	0	12.0721	0	0	0	0
Adults Facing Chronic Exclusion	Devon and Cornwall	0	1.7	15.57	8	20	South	0	0	0	1	684	1027	0.1	9.404	12	0	0	0	0	5	0	0	2.47554	0	0	3.83879	0	0	0	0
Adults Facing Chronic Exclusion	Dorset and Somerset	0	1.3	18.58	2	2	South	0	0	0	1	841	610	0.1	6.932	8	0	0	0	0	6	0	0	2.75534	0	0	6.36757	0	0	0	0
Adults Facing Chronic Exclusion	Essex	0	2	14.27	18	11	South	0	0	0	1	879	367	0.2	9.899	9	0	0	0	0	10	0	0	1.16173	0	0	3.55793	0	0	0	0
Adults Facing Chronic Exclusion	Gloucestershire, Wiltshire and Swindon	0	1.5	12.34	32	3	South	0	0	0	1	847	614	0.1	7.24	5	0	0	0	0	7	0	0	2.09392	0	0	8.88536	0	0	0	0
Adults Facing Chronic Exclusion	Hampshire and Isle of Wight	0	1.6	15.36	10	7	South	0	0	0	1	706	415	0.2	11.11	5	0	0	0	0	8	0	0	2.75248	0	0	4.12781	0	0	0	0
Adults Facing Chronic Exclusion	Kent	0	2.2	13.12	27	23	South	0	0	0	1	1380	374	0.4	9.63	6	0	0	0	0	9	0	0	1.26168	0	0	5.66978	0	0	0	0
Adults Facing Chronic Exclusion	Leicestershire, Rutland and Northamptonshire	0	2.5	13.68	24		Midlands	0	1	0	0	706	490	0.1	9.88	12	0	0			14	0	0	2.51518	0	0	4.81174	0	0	0	0
Adults Facing Chronic Exclusion	London (Brent, Harrow and Hillingdon)	0	3.5	12.25	35		London	0	0	1	0	900	21	4.3	4.681	8	0	0			39	0	0	2.62551	0	0	7.93207	0	0	0	0
Adults Facing Chronic Exclusion	London (Central)	1	3.6	11.93	37	13	London	0	0	1	0	1879	7	26.8	5.527	12	0	0	0	0	29	0	0	3.56432	0	0	9.81907	0	0	0	0
Adults Facing Chronic Exclusion	London (City and East)	0	7.3	11.19	39	17	London	0	0	1	0	1179	8	14.7	4.534	16	0	0	0	0	43	0	0	2.74151	0	0	23.7583	0	0	0	0
Adults Facing Chronic Exclusion	London (Lambeth, Southwark and Wandsworth)	1	4.3	12.34	33	27	London	0	0	1	0	1354	9	15	5.698	11	0	0	0	0	29	0	0	4.48403	0	0	14.0347	0	0	0	0
Adults Facing Chronic Exclusion	London (North East)	0	3.8	12.62	29		London	0	0	1	0	834	24	3.5	5.397	9	0	0			31	0	0	3.81323	0	0	7.99333	0	0	0	0
Adults Facing Chronic Exclusion	London (North)	0	4.5	12.77	28		London	0	0	1	0	1687	20	8.4	5.391	9	0	0			31	0	0	5.76145	0	0	15.4183	0	0	0	0
Adults Facing Chronic Exclusion	London (South East)	1	3.8	19.81	1		London	0	0	1	0	1119	14	8	4.467	13	0	0			26	0	0	3.98702	0	0	14.1639	0	0	0	0
Adults Facing Chronic Exclusion	London (South)	1	2	16.57	3		London	0	0	1	0	1748	41	4.3	8.583	11	0	0			23	0	0	4.71513	0	0	6.48841	0	0	0	0
Adults Facing Chronic Exclusion	London (West)	0	3.3	15.04	13		London	0	0	1	0	781	13	6	4.73	8	0	0			34	0	0	3.64693	0	0	22.2896	0	0	0	0
Adults Facing Chronic Exclusion	Manchester (Central)	0	4	14.68	15	42	North	1	0	0	0	1084	32	3.4	5.512	16	0	0	0	0	18	0	0	2.39478	0	0	9.082	0	0	0	0
Adults Facing Chronic Exclusion	Manchester (East and West)	1	3.1	15.7	7	37	North	1	0	0	0	1458	96	1.5	10.233	13	0	0	0	0	11	0	0	3.41933	0	0	6.24059	0	0	0	0
Adults Facing Chronic Exclusion	Marches	0	2	16.27	4	32	Midlands	0	1	0	0	1297	741	0.2	7.062	10	0	0	0	0	6	0	0	2.18918	0	0	15.6938	0	0	0	0
Adults Facing Chronic Exclusion	Merseyside	0	5.5	11.7	38		North	1	0	0	0	1000	64	1.6	8.258	14	0	0			6	0	0	1.61298	0	0	4.73965	0	0	0	0
Adults Facing Chronic Exclusion	Norfolk	0	2.3	12.5	31	39	South	0	0	0	1	1061	537	0.2	4.791	4	0	0	0	0	7	0	0	0.30683	0	0	11.2169	0	0	0	0
Adults Facing Chronic Exclusion	North East Yorkshire and the Humber	0	2.8	14.13	20	18	North	1	0	0	0	833	1183	0.1	10.006	5	0	0	0	0	7	0	0	2.29562	0	0	2.78133	0	0	0	0
Adults Facing Chronic Exclusion	Northumbria	1	3.1	14.14	19	28	North	1	0	0	0	1944	542	0.4	6.841	19	0	0	0	0	7	0	0	2.70136	0	0	11.0072	0	0	0	0
Adults Facing Chronic Exclusion	Nottinghamshire and Lincolnshire	0	2.7	13.76	22		Midlands	0	1	0	0	2622	808	0.3	10.397	13	0	0			9	0	0	0.89353	0	0	3.2721	0	0	0	0
Adults Facing Chronic Exclusion	South Tyne and Wear Valley	1	4.3	14.4	16	41	North	1	0	0	0	993	236	0.4	4.802	10	0	0	0	0	5	0	0	2.4115	0	0	13.3132	0	0	0	0
Adults Facing Chronic Exclusion	South Yorkshire	0	3.5	14.87	14	47	North	1	0	0	0	1652	155	1.1	7.845	14	0	0	0	0	10	0	0	2.07266	0	0	14.3531	0	0	0	0
Adults Facing Chronic Exclusion	Staffordshire	0	2.2	15.4	9	36	Midlands	0	1	0	0	656	271	0.2	6.501	4	0	0	0	0	7	0	0	1.66897	0	0	6.38517	0	0	0	0
Adults Facing Chronic Exclusion	Surrey and Sussex	0	1.5	13.49	25	5	South	0	0	0	1	2168	544	0.4	15.376	10	0	0	0	0	10	0	0	1.09781	0	0	3.7526	0	0	0	0
Adults Facing Chronic Exclusion	Tees Valley	0	4.8	12.3	34	29	North	1	0	0	0	1226	79	1.6	3.984	9	0	0	0	0	6	0	0	4.10392	0	0	18.6145	0	0	0	0
Adults Facing Chronic Exclusion	Thames Valley (Berks, Bucks, Oxfs)	1	1.4	15.94	6	14	South	0	0	0	1	1052	574	0.2	13.476	9	0	0	0	0	14	0	0	2.68106	0	0	3.32072	0	0	0	0
Adults Facing Chronic Exclusion	West Of England	1	1.7	15.15	12	1	South	0	0	0	1	1674	133	1.3	6.329	7	0	0	0	0	10	0	0	1.83441	0	0	5.71022	0	0	0	0
Adults Facing Chronic Exclusion	West Yorkshire	1	3.3	13.98	21	33	North	1	0	0	0	2180	203	1.1	13.065	18	0	0	0	0	16	0	0	1.41906	0	0	2.33295	0	0	0	0
Ambition Programme	Bedfordshire and Hertfordshire	0	2	15.49	13		South	0	0	0	1	1221	288	0.4	10.06	5	0	1			15	0	0	1.55467	0	0	3.32505	0	0	0	13
Ambition Programme	Birmingham and Solihull	0	6.9	11.34	38		Midlands	0	1	0	0	1834	45	4.1	7.242	8	0	1			29	0	0	0.7636	0	0	6.24827	0	0	0	38
Ambition Programme	Black Country	1	5.4	12.67	33		Midlands	0	1	0	0	1636	36	4.5	6.501	7	0	1			19	0	0	5.12844	0	0	4.99923	0	0	0	33
Ambition Programme	Cambridgeshire and Suffolk	0	2	15.02	15		South	0	0	0	1	1639	719	0.2	8.607	3	0	1			11	0	0	1.31637	0	0	4.89601	0	0	0	15
Ambition Programme	Cheshire, Halton and Warrington	0	2.2	16.5	5		North	1	0	0	0	1654	234	0.7	6.067	3	0	1			4	0	0	3.57013	0	0	9.15774	0	0	0	5
Ambition Programme	Coventry and Warwickshire	0	2.9	14.43	20		Midlands	0	1	0	0	734	207	0.4	5.056	6	0	1			14	0	0	1.17089	0	0	7.97666	0	0	0	20
Ambition Programme	Cumbria and Lancashire	1	2.3	15.45	14		North	1	0	0	0	1212	984	0.1	11.59	6	0	1			8	0	0	1.22174	0	0	2.47714	0	0	0	14
Ambition Programme	Derbyshire	0	2.6	13.83	25		Midlands	0	1	0	0	825	262	0.3	5.96	4	0	1			7	0	0	1.04362	0	0	12.0721	0	0	0	25
Ambition Programme	Devon and Cornwall	0	1.7	16.25	8		South	0	0	0	1	684	1027	0.1	9.404	9	0	1			5	0	0	2.47554	0	0	3.83879	0	0	0	8
Ambition Programme	Dorset and Somerset	0	1.3	16.51	4		South	0	0	0	1	841	610	0.1	6.932	3	0	1			6	0	0	2.75534	0	0	6.36757	0	0	0	4
Ambition Programme	Essex	0	2	16.12	9		South	0	0	0	1	879	367	0.2	9.899	5	0	1			10	0	0	1.16173	0	0	3.55793	0	0	0	9
Ambition Programme	Gloucestershire, Wiltshire and Swindon	0	1.5	14.27	23		South	0	0	0	1	847	614	0.1	7.24	2	0	1			7	0	0	2.09392	0	0	8.88536	0	0	0	23
Ambition Programme	Hampshire and Isle of Wight	0	1.6	16.87	2		South	0	0	0	1	706	415	0.2	11.11	3	0	1			8	0	0	2.75248	0	0	4.12781	0	0	0	2
Ambition Programme	Kent	0	2.2	15.83	12		South	0	0	0	1	1380	374	0.4	9.63	3	0	1			9	0	0	1.26168	0	0	5.66978	0	0	0	12
Ambition Programme	Leicestershire, Rutland and Northamptonshire	0	2.5	14.17	24		Midlands	0	1	0	0	706	490	0.1	9.88	4	0	1			14	0	0	2.51518	0	0	4.81174	0	0	0	24
Ambition Programme	London (Brent, Harrow and Hillingdon)	0	3.5	12.81	31		London	0	0	1	0	900	21	4.3	4.681	3	0	1			39	0	0	2.62551	0	0	7.93207	0	0	0	31
Ambition Programme	London (Central)	1	3.6	10.47	39		London	0	0	1	0	1879	7	26.8	5.527	4	0	1			29	0	0	3.56432	0	0	9.81907	0	0	0	39
Ambition Programme	London (City and East)	0	7.3	12.82	30		London	0	0	1	0	1179	8	14.7	4.534	7	0	1			43	0	0	2.74151	0	0	23.7583	0	0	0	30
Ambition Programme	London (Lambeth, Southwark and Wandsworth)	0	4.3	10.24	40		London	0	0	1	0	1354	9	15	5.698	5	0	1			29	0	0	4.48403	0	0	14.0347	0	0	0	40
Ambition Programme	London (North East)	0	3.8	12.53	34		London	0	0	1	0	834	24	3.5	5.397	4	0	1			31	0	0	3.81323	0	0	7.99333	0	0	0	34
Ambition Programme	London (North)	0	4.5	12.8	32		London	0	0	1	0	1687	20	8.4	5.391	3	0	1			31	0	0	5.76145	0	0	15.4183	0	0	0	32
Ambition Programme	London (South East)	0	3.8	17.83	1		London	0	0	1	0	1119	14	8	4.467	6	0	1			26	0	0	3.98702	0	0	14.1639	0	0	0	1
Ambition Programme	London (South)	0	2	12.06	36		London	0	0	1	0	1748	41	4.3	8.583	3	0	1			23	0	0	4.71513	0	0	6.48841	0	0	0	36
Ambition Programme	London (West)	0	3.3	13.54	26		London	0	0	1	0	781	13	6	4.73	2	0	1			34	0	0	3.64693	0	0	22.2896	0	0	0	26
Ambition Programme	Manchester (Central)	1	4	11.51	37		North	1	0	0	0	1084	32	3.4	5.512	6	0	1			18	0	0	2.39478	0	0	9.082	0	0	0	37
Ambition Programme	Manchester (East and West)	0	3.1	16.02	10		North	1	0	0	0	1458	96	1.5	10.233	7	0	1			11	0	0	3.41933	0	0	6.24059	0	0	0	10
Ambition Programme	Marches	0	2	16.86	3		Midlands	0	1	0	0	1297	741	0.2	7.062	7	0	1			6	0	0	2.18918	0	0	15.6938	0	0	0	3
Ambition Programme	Merseyside	0	5.5	12.07	35		North	1	0	0	0	1000	64	1.6	8.258	9	0	1			6	0	0	1.61298	0	0	4.73965	0	0	0	35
Ambition Programme	Norfolk	0	2.3	14.78	18		South	0	0	0	1	1061	537	0.2	4.791	2	0	1			7	0	0	0.30683	0	0	11.2169	0	0	0	18
Ambition Programme	North East Yorkshire and the Humber	0	2.8	14.6	19		North	1	0	0	0	833	1183	0.1	10.006	3	0	1			7	0	0	2.29562	0	0	2.78133	0	0	0	19
Ambition Programme	Northumbria	0	3.1	13.31	28		North	1	0	0	0	1944	542	0.4	6.841	10	0	1			7	0	0	2.70136	0	0	11.0072	0	0	0	28
Ambition Programme	Nottinghamshire and Lincolnshire	0	2.7	14.96	16		Midlands	0	1	0	0	2622	808	0.3	10.397	8	0	1			9	0	0	0.89353	0	0	3.2721	0	0	0	16
Ambition Programme	South Tyne and Wear Valley	0	4.3	13.47	27		North	1	0	0	0	993	236	0.4	4.802	8	0	1			5	0	0	2.4115	0	0	13.3132	0	0	0	27
Ambition Programme	South Yorkshire	0	3.5	14.33	21		North	1	0	0	0	1652	155	1.1	7.845	9	0	1			10	0	0	2.07266	0	0	14.3531	0	0	0	21
Ambition Programme	Staffordshire	0	2.2	15.98	11		Midlands	0	1	0	0	656	271	0.2	6.501	1	0	1			7	0	0	1.66897	0	0	6.38517	0	0	0	11
Ambition Programme	Surrey and Sussex	0	1.5	14.91	17		South	0	0	0	1	2168	544	0.4	15.376	5	0	1			10	0	0	1.09781	0	0	3.7526	0	0	0	17
Ambition Programme	Tees Valley	0	4.8	12.88	29		North	1	0	0	0	1226	79	1.6	3.984	5	0	1			6	0	0	4.10392	0	0	18.6145	0	0	0	29
Ambition Programme	Thames Valley (Berks, Bucks, Oxfs)	0	1.4	16.27	7		South	0	0	0	1	1052	574	0.2	13.476	4	0	1			14	0	0	2.68106	0	0	3.32072	0	0	0	7
Ambition Programme	West Of England	0	1.7	16.49	6		South	0	0	0	1	1674	133	1.3	6.329	6	0	1			10	0	0	1.83441	0	0	5.71022	0	0	0	6
Ambition Programme	West Yorkshire	0	3.3	14.33	22		North	1	0	0	0	2180	203	1.1	13.065	9	0	1			16	0	0	1.41906	0	0	2.33295	0	0	0	22
Back to Work Group Sessions	Bedfordshire and Hertfordshire		2			21	South	0	0	0	1	1221	288	0.4	10.06	10	1	1	21	21	15	0	0	1.55467	0	0	3.32505	0	0
Back to Work Group Sessions	Birmingham and Solihull		6.9			10	Midlands	0	1	0	0	1834	45	4.1	7.242	20	1	1	10	10	29	0	0	0.7636	0	0	6.24827	0	0
Back to Work Group Sessions	Black Country		5.4			46	Midlands	0	1	0	0	1636	36	4.5	6.501	14	1	1	46	46	19	0	0	5.12844	0	0	4.99923	0	0
Back to Work Group Sessions	Cambridgeshire and Suffolk		2			8	South	0	0	0	1	1639	719	0.2	8.607	6	1	1	8	8	11	0	0	1.31637	0	0	4.89601	0	0
Back to Work Group Sessions	Cheshire, Halton and Warrington		2.2			43	North	1	0	0	0	1654	234	0.7	6.067	6	1	1	43	43	4	0	0	3.57013	0	0	9.15774	0	0
Back to Work Group Sessions	Coventry and Warwickshire		2.9			9	Midlands	0	1	0	0	734	207	0.4	5.056	10	1	1	9	9	14	0	0	1.17089	0	0	7.97666	0	0
Back to Work Group Sessions	Cumbria and Lancashire		2.3				North	1	0	0	0	1212	984	0.1	11.59	13	1	1			8	0	0	1.22174	0	0	2.47714	0	0
Back to Work Group Sessions	Derbyshire		2.6			6	Midlands	0	1	0	0	825	262	0.3	5.96	8	1	1	6	6	7	0	0	1.04362	0	0	12.0721	0	0
Back to Work Group Sessions	Devon and Cornwall		1.7			20	South	0	0	0	1	684	1027	0.1	9.404	12	1	1	20	20	5	0	0	2.47554	0	0	3.83879	0	0
Back to Work Group Sessions	Dorset and Somerset		1.3			2	South	0	0	0	1	841	610	0.1	6.932	8	1	1	2	2	6	0	0	2.75534	0	0	6.36757	0	0
Back to Work Group Sessions	Essex		2			11	South	0	0	0	1	879	367	0.2	9.899	10	1	1	11	11	10	0	0	1.16173	0	0	3.55793	0	0
Back to Work Group Sessions	Gloucestershire, Wiltshire and Swindon		1.5			3	South	0	0	0	1	847	614	0.1	7.24	5	1	1	3	3	7	0	0	2.09392	0	0	8.88536	0	0
Back to Work Group Sessions	Hampshire and Isle of Wight		1.6			7	South	0	0	0	1	706	415	0.2	11.11	5	1	1	7	7	8	0	0	2.75248	0	0	4.12781	0	0
Back to Work Group Sessions	Kent		2.2			23	South	0	0	0	1	1380	374	0.4	9.63	6	1	1	23	23	9	0	0	1.26168	0	0	5.66978	0	0
Back to Work Group Sessions	Leicestershire, Rutland and Northamptonshire		2.5				Midlands	0	1	0	0	706	490	0.1	9.88	12	1	1			14	0	0	2.51518	0	0	4.81174	0	0
Back to Work Group Sessions	London (Brent, Harrow and Hillingdon)		3.5				London	0	0	1	0	900	21	4.3	4.681	8	1	1			39	0	0	2.62551	0	0	7.93207	0	0
Back to Work Group Sessions	London (Central)		3.6			13	London	0	0	1	0	1879	7	26.8	5.527	13	1	1	13	13	29	0	0	3.56432	0	0	9.81907	0	0
Back to Work Group Sessions	London (City and East)		7.3			17	London	0	0	1	0	1179	8	14.7	4.534	16	1	1	17	17	43	0	0	2.74151	0	0	23.7583	0	0
Back to Work Group Sessions	London (Lambeth, Southwark and Wandsworth)		4.3			27	London	0	0	1	0	1354	9	15	5.698	12	1	1	27	27	29	0	0	4.48403	0	0	14.0347	0	0
Back to Work Group Sessions	London (North East)		3.8				London	0	0	1	0	834	24	3.5	5.397	9	1	1			31	0	0	3.81323	0	0	7.99333	0	0
Back to Work Group Sessions	London (North)		4.5				London	0	0	1	0	1687	20	8.4	5.391	9	1	1			31	0	0	5.76145	0	0	15.4183	0	0
Back to Work Group Sessions	London (South East)		3.8				London	0	0	1	0	1119	14	8	4.467	14	1	1			26	0	0	3.98702	0	0	14.1639	0	0
Back to Work Group Sessions	London (South)		2				London	0	0	1	0	1748	41	4.3	8.583	12	1	1			23	0	0	4.71513	0	0	6.48841	0	0
Back to Work Group Sessions	London (West)		3.3				London	0	0	1	0	781	13	6	4.73	8	1	1			34	0	0	3.64693	0	0	22.2896	0	0
Back to Work Group Sessions	Manchester (Central)		4			42	North	1	0	0	0	1084	32	3.4	5.512	16	1	1	42	42	18	0	0	2.39478	0	0	9.082	0	0
Back to Work Group Sessions	Manchester (East and West)		3.1			37	North	1	0	0	0	1458	96	1.5	10.233	14	1	1	37	37	11	0	0	3.41933	0	0	6.24059	0	0
Back to Work Group Sessions	Marches		2			32	Midlands	0	1	0	0	1297	741	0.2	7.062	11	1	1	32	32	6	0	0	2.18918	0	0	15.6938	0	0
Back to Work Group Sessions	Merseyside		5.5				North	1	0	0	0	1000	64	1.6	8.258	14	1	1			6	0	0	1.61298	0	0	4.73965	0	0
Back to Work Group Sessions	Norfolk		2.3			39	South	0	0	0	1	1061	537	0.2	4.791	5	1	1	39	39	7	0	0	0.30683	0	0	11.2169	0	0
Back to Work Group Sessions	North East Yorkshire and the Humber		2.8			18	North	1	0	0	0	833	1183	0.1	10.006	5	1	1	18	18	7	0	0	2.29562	0	0	2.78133	0	0
Back to Work Group Sessions	Northumbria		3.1			28	North	1	0	0	0	1944	542	0.4	6.841	20	1	1	28	28	7	0	0	2.70136	0	0	11.0072	0	0
Back to Work Group Sessions	Nottinghamshire and Lincolnshire		2.7				Midlands	0	1	0	0	2622	808	0.3	10.397	13	1	1			9	0	0	0.89353	0	0	3.2721	0	0
Back to Work Group Sessions	South Tyne and Wear Valley		4.3			41	North	1	0	0	0	993	236	0.4	4.802	11	1	1	41	41	5	0	0	2.4115	0	0	13.3132	0	0
Back to Work Group Sessions	South Yorkshire		3.5			47	North	1	0	0	0	1652	155	1.1	7.845	14	1	1	47	47	10	0	0	2.07266	0	0	14.3531	0	0
Back to Work Group Sessions	Staffordshire		2.2			36	Midlands	0	1	0	0	656	271	0.2	6.501	5	1	1	36	36	7	0	0	1.66897	0	0	6.38517	0	0
Back to Work Group Sessions	Surrey and Sussex		1.5			5	South	0	0	0	1	2168	544	0.4	15.376	10	1	1	5	5	10	0	0	1.09781	0	0	3.7526	0	0
Back to Work Group Sessions	Tees Valley		4.8			29	North	1	0	0	0	1226	79	1.6	3.984	9	1	1	29	29	6	0	0	4.10392	0	0	18.6145	0	0
Back to Work Group Sessions	Thames Valley (Berks, Bucks, Oxfs)		1.4			14	South	0	0	0	1	1052	574	0.2	13.476	10	1	1	14	14	14	0	0	2.68106	0	0	3.32072	0	0
Back to Work Group Sessions	West Of England		1.7			1	South	0	0	0	1	1674	133	1.3	6.329	8	1	1	1	1	10	0	0	1.83441	0	0	5.71022	0	0
Back to Work Group Sessions	West Yorkshire		3.3			33	North	1	0	0	0	2180	203	1.1	13.065	19	1	1	33	33	16	0	0	1.41906	0	0	2.33295	0	0
Basic Skills Mandatory Training	Bedfordshire and Hertfordshire	1	2	18.82	16		South	0	0	0	1	1221	288	0.4	10.06	5	0	1			15	0	0	1.55467	0	0	3.32505	0	0	0	16
Basic Skills Mandatory Training	Birmingham and Solihull	0	6.9	13.14	38		Midlands	0	1	0	0	1834	45	4.1	7.242	9	0	1			29	0	0	0.7636	0	0	6.24827	0	0	0	38
Basic Skills Mandatory Training	Black Country	1	5.4	18.12	19		Midlands	0	1	0	0	1636	36	4.5	6.501	8	0	1			19	0	0	5.12844	0	0	4.99923	0	0	0	19
Basic Skills Mandatory Training	Cambridgeshire and Suffolk	0	2	17.56	23		South	0	0	0	1	1639	719	0.2	8.607	3	0	1			11	0	0	1.31637	0	0	4.89601	0	0	0	23
Basic Skills Mandatory Training	Cheshire, Halton and Warrington	1	2.2	21.19	7		North	1	0	0	0	1654	234	0.7	6.067	3	0	1			4	0	0	3.57013	0	0	9.15774	0	0	0	7
Basic Skills Mandatory Training	Coventry and Warwickshire	0	2.9	16.55	29		Midlands	0	1	0	0	734	207	0.4	5.056	6	0	1			14	0	0	1.17089	0	0	7.97666	0	0	0	29
Basic Skills Mandatory Training	Cumbria and Lancashire	0	2.3	20.97	8		North	1	0	0	0	1212	984	0.1	11.59	8	0	1			8	0	0	1.22174	0	0	2.47714	0	0	0	8
Basic Skills Mandatory Training	Derbyshire	0	2.6	18.06	20		Midlands	0	1	0	0	825	262	0.3	5.96	6	0	1			7	0	0	1.04362	0	0	12.0721	0	0	0	20
Basic Skills Mandatory Training	Devon and Cornwall	0	1.7	18.68	18		South	0	0	0	1	684	1027	0.1	9.404	10	0	1			5	0	0	2.47554	0	0	3.83879	0	0	0	18
Basic Skills Mandatory Training	Dorset and Somerset	1	1.3	20.55	10		South	0	0	0	1	841	610	0.1	6.932	5	0	1			6	0	0	2.75534	0	0	6.36757	0	0	0	10
Basic Skills Mandatory Training	Essex	0	2	19.54	13		South	0	0	0	1	879	367	0.2	9.899	6	0	1			10	0	0	1.16173	0	0	3.55793	0	0	0	13
Basic Skills Mandatory Training	Gloucestershire, Wiltshire and Swindon	0	1.5	17.86	21		South	0	0	0	1	847	614	0.1	7.24	3	0	1			7	0	0	2.09392	0	0	8.88536	0	0	0	21
Basic Skills Mandatory Training	Hampshire and Isle of Wight	0	1.6	21.41	5		South	0	0	0	1	706	415	0.2	11.11	3	0	1			8	0	0	2.75248	0	0	4.12781	0	0	0	5
Basic Skills Mandatory Training	Kent	1	2.2	19.52	14		South	0	0	0	1	1380	374	0.4	9.63	4	0	1			9	0	0	1.26168	0	0	5.66978	0	0	0	14
Basic Skills Mandatory Training	Leicestershire, Rutland and Northamptonshire	1	2.5	14.01	36		Midlands	0	1	0	0	706	490	0.1	9.88	4	0	1			14	0	0	2.51518	0	0	4.81174	0	0	0	36
Basic Skills Mandatory Training	London (Brent, Harrow and Hillingdon)	0	3.5	12.7	39		London	0	0	1	0	900	21	4.3	4.681	4	0	1			39	0	0	2.62551	0	0	7.93207	0	0	0	39
Basic Skills Mandatory Training	London (Central)	0	3.6	13.51	37		London	0	0	1	0	1879	7	26.8	5.527	6	0	1			29	0	0	3.56432	0	0	9.81907	0	0	0	37
Basic Skills Mandatory Training	London (City and East)	0	7.3	14.28	35		London	0	0	1	0	1179	8	14.7	4.534	9	0	1			43	0	0	2.74151	0	0	23.7583	0	0	0	35
Basic Skills Mandatory Training	London (Lambeth, Southwark and Wandsworth)	0	4.3	12.49	40		London	0	0	1	0	1354	9	15	5.698	6	0	1			29	0	0	4.48403	0	0	14.0347	0	0	0	40
Basic Skills Mandatory Training	London (North East)	0	3.8	16.61	27		London	0	0	1	0	834	24	3.5	5.397	5	0	1			31	0	0	3.81323	0	0	7.99333	0	0	0	27
Basic Skills Mandatory Training	London (North)	0	4.5	14.65	34		London	0	0	1	0	1687	20	8.4	5.391	4	0	1			31	0	0	5.76145	0	0	15.4183	0	0	0	34
Basic Skills Mandatory Training	London (South East)	0	3.8	21.8	4		London	0	0	1	0	1119	14	8	4.467	7	0	1			26	0	0	3.98702	0	0	14.1639	0	0	0	4
Basic Skills Mandatory Training	London (South)	1	2	15.78	31		London	0	0	1	0	1748	41	4.3	8.583	4	0	1			23	0	0	4.71513	0	0	6.48841	0	0	0	31
Basic Skills Mandatory Training	London (West)	0	3.3	17.32	25		London	0	0	1	0	781	13	6	4.73	3	0	1			34	0	0	3.64693	0	0	22.2896	0	0	0	25
Basic Skills Mandatory Training	Manchester (Central)	0	4	15.86	30		North	1	0	0	0	1084	32	3.4	5.512	9	0	1			18	0	0	2.39478	0	0	9.082	0	0	0	30
Basic Skills Mandatory Training	Manchester (East and West)	1	3.1	20.83	9		North	1	0	0	0	1458	96	1.5	10.233	7	0	1			11	0	0	3.41933	0	0	6.24059	0	0	0	9
Basic Skills Mandatory Training	Marches	0	2	21.92	2		Midlands	0	1	0	0	1297	741	0.2	7.062	7	0	1			6	0	0	2.18918	0	0	15.6938	0	0	0	2
Basic Skills Mandatory Training	Merseyside	0	5.5	14.75	33		North	1	0	0	0	1000	64	1.6	8.258	9	0	1			6	0	0	1.61298	0	0	4.73965	0	0	0	33
Basic Skills Mandatory Training	Norfolk	0	2.3	17.52	24		South	0	0	0	1	1061	537	0.2	4.791	2	0	1			7	0	0	0.30683	0	0	11.2169	0	0	0	24
Basic Skills Mandatory Training	North East Yorkshire and the Humber	1	2.8	18.95	15		North	1	0	0	0	833	1183	0.1	10.006	3	0	1			7	0	0	2.29562	0	0	2.78133	0	0	0	15
Basic Skills Mandatory Training	Northumbria	0	3.1	17.32	26		North	1	0	0	0	1944	542	0.4	6.841	13	0	1			7	0	0	2.70136	0	0	11.0072	0	0	0	26
Basic Skills Mandatory Training	Nottinghamshire and Lincolnshire	1	2.7	19.57	12		Midlands	0	1	0	0	2622	808	0.3	10.397	8	0	1			9	0	0	0.89353	0	0	3.2721	0	0	0	12
Basic Skills Mandatory Training	South Tyne and Wear Valley	1	4.3	21.86	3		North	1	0	0	0	993	236	0.4	4.802	8	0	1			5	0	0	2.4115	0	0	13.3132	0	0	0	3
Basic Skills Mandatory Training	South Yorkshire	0	3.5	18.72	17		North	1	0	0	0	1652	155	1.1	7.845	10	0	1			10	0	0	2.07266	0	0	14.3531	0	0	0	17
Basic Skills Mandatory Training	Staffordshire	0	2.2	23.59	1		Midlands	0	1	0	0	656	271	0.2	6.501	1	0	1			7	0	0	1.66897	0	0	6.38517	0	0	0	1
Basic Skills Mandatory Training	Surrey and Sussex	0	1.5	16.56	28		South	0	0	0	1	2168	544	0.4	15.376	5	0	1			10	0	0	1.09781	0	0	3.7526	0	0	0	28
Basic Skills Mandatory Training	Tees Valley	0	4.8	17.64	22		North	1	0	0	0	1226	79	1.6	3.984	6	0	1			6	0	0	4.10392	0	0	18.6145	0	0	0	22
Basic Skills Mandatory Training	Thames Valley (Berks, Bucks, Oxfs)	1	1.4	15.31	32		South	0	0	0	1	1052	574	0.2	13.476	4	0	1			14	0	0	2.68106	0	0	3.32072	0	0	0	32
Basic Skills Mandatory Training	West Of England	0	1.7	21.28	6		South	0	0	0	1	1674	133	1.3	6.329	6	0	1			10	0	0	1.83441	0	0	5.71022	0	0	0	6
Basic Skills Mandatory Training	West Yorkshire	1	3.3	20.29	11		North	1	0	0	0	2180	203	1.1	13.065	9	0	1			16	0	0	1.41906	0	0	2.33295	0	0	0	11
Better-off in Work Credit	Bedfordshire and Hertfordshire	0	2	18.4	10	21	South	0	0	0	1	1221	288	0.4	10.06	11	0	1	0	21	15	0	0	1.55467	0	0	3.32505	0	0	0	10
Better-off in Work Credit	Birmingham and Solihull	0	6.9	11.97	40	10	Midlands	0	1	0	0	1834	45	4.1	7.242	23	0	1	0	10	29	0	0	0.7636	0	0	6.24827	0	0	0	40
Better-off in Work Credit	Black Country	0	5.4	14.93	33	46	Midlands	0	1	0	0	1636	36	4.5	6.501	16	0	1	0	46	19	0	0	5.12844	0	0	4.99923	0	0	0	33
Better-off in Work Credit	Cambridgeshire and Suffolk	0	2	15.85	29	8	South	0	0	0	1	1639	719	0.2	8.607	7	0	1	0	8	11	0	0	1.31637	0	0	4.89601	0	0	0	29
Better-off in Work Credit	Cheshire, Halton and Warrington	0	2.2	19.2	6	43	North	1	0	0	0	1654	234	0.7	6.067	6	0	1	0	43	4	0	0	3.57013	0	0	9.15774	0	0	0	6
Better-off in Work Credit	Coventry and Warwickshire	0	2.9	14.76	34	9	Midlands	0	1	0	0	734	207	0.4	5.056	11	0	1	0	9	14	0	0	1.17089	0	0	7.97666	0	0	0	34
Better-off in Work Credit	Cumbria and Lancashire	0	2.3	19.08	7		North	1	0	0	0	1212	984	0.1	11.59	14	0	1			8	0	0	1.22174	0	0	2.47714	0	0	0	7
Better-off in Work Credit	Derbyshire	0	2.6	17.46	15	6	Midlands	0	1	0	0	825	262	0.3	5.96	8	0	1	0	6	7	0	0	1.04362	0	0	12.0721	0	0	0	15
Better-off in Work Credit	Devon and Cornwall	0	1.7	18.49	9	20	South	0	0	0	1	684	1027	0.1	9.404	12	0	1	0	20	5	0	0	2.47554	0	0	3.83879	0	0	0	9
Better-off in Work Credit	Dorset and Somerset	0	1.3	23.01	2	2	South	0	0	0	1	841	610	0.1	6.932	9	0	1	0	2	6	0	0	2.75534	0	0	6.36757	0	0	0	2
Better-off in Work Credit	Essex	0	2	15.86	28	11	South	0	0	0	1	879	367	0.2	9.899	10	0	1	0	11	10	0	0	1.16173	0	0	3.55793	0	0	0	28
Better-off in Work Credit	Gloucestershire, Wiltshire and Swindon	0	1.5	15.31	32	3	South	0	0	0	1	847	614	0.1	7.24	5	0	1	0	3	7	0	0	2.09392	0	0	8.88536	0	0	0	32
Better-off in Work Credit	Hampshire and Isle of Wight	0	1.6	19.27	5	7	South	0	0	0	1	706	415	0.2	11.11	6	0	1	0	7	8	0	0	2.75248	0	0	4.12781	0	0	0	5
Better-off in Work Credit	Kent	0	2.2	17.62	14	23	South	0	0	0	1	1380	374	0.4	9.63	6	0	1	0	23	9	0	0	1.26168	0	0	5.66978	0	0	0	14
Better-off in Work Credit	Leicestershire, Rutland and Northamptonshire	0	2.5	16.17	25		Midlands	0	1	0	0	706	490	0.1	9.88	12	0	1			14	0	0	2.51518	0	0	4.81174	0	0	0	25
Better-off in Work Credit	London (Brent, Harrow and Hillingdon)	0	3.5	15.54	31		London	0	0	1	0	900	21	4.3	4.681	8	0	1			39	0	0	2.62551	0	0	7.93207	0	0	0	31
Better-off in Work Credit	London (Central)	0	3.6	14.31	35	13	London	0	0	1	0	1879	7	26.8	5.527	15	0	1	0	13	29	0	0	3.56432	0	0	9.81907	0	0	0	35
Better-off in Work Credit	London (City and East)	0	7.3	13.02	39	17	London	0	0	1	0	1179	8	14.7	4.534	16	0	1	0	17	43	0	0	2.74151	0	0	23.7583	0	0	0	39
Better-off in Work Credit	London (Lambeth, Southwark and Wandsworth)	0	4.3	13.6	37	27	London	0	0	1	0	1354	9	15	5.698	15	0	1	0	27	29	0	0	4.48403	0	0	14.0347	0	0	0	37
Better-off in Work Credit	London (North East)	0	3.8	16.6	21		London	0	0	1	0	834	24	3.5	5.397	10	0	1			31	0	0	3.81323	0	0	7.99333	0	0	0	21
Better-off in Work Credit	London (North)	0	4.5	16.12	26		London	0	0	1	0	1687	20	8.4	5.391	10	0	1			31	0	0	5.76145	0	0	15.4183	0	0	0	26
Better-off in Work Credit	London (South East)	0	3.8	28.87	1		London	0	0	1	0	1119	14	8	4.467	14	0	1			26	0	0	3.98702	0	0	14.1639	0	0	0	1
Better-off in Work Credit	London (South)	0	2	19.41	4		London	0	0	1	0	1748	41	4.3	8.583	12	0	1			23	0	0	4.71513	0	0	6.48841	0	0	0	4
Better-off in Work Credit	London (West)	0	3.3	16.07	27		London	0	0	1	0	781	13	6	4.73	9	0	1			34	0	0	3.64693	0	0	22.2896	0	0	0	27
Better-off in Work Credit	Manchester (Central)	0	4	16.46	22	42	North	1	0	0	0	1084	32	3.4	5.512	18	0	1	0	42	18	0	0	2.39478	0	0	9.082	0	0	0	22
Better-off in Work Credit	Manchester (East and West)	0	3.1	17.73	12	37	North	1	0	0	0	1458	96	1.5	10.233	16	0	1	0	37	11	0	0	3.41933	0	0	6.24059	0	0	0	12
Better-off in Work Credit	Marches	0	2	17.97	11	32	Midlands	0	1	0	0	1297	741	0.2	7.062	13	0	1	0	32	6	0	0	2.18918	0	0	15.6938	0	0	0	11
Better-off in Work Credit	Merseyside	0	5.5	13.54	38		North	1	0	0	0	1000	64	1.6	8.258	15	0	1			6	0	0	1.61298	0	0	4.73965	0	0	0	38
Better-off in Work Credit	Norfolk	0	2.3	17.19	18	39	South	0	0	0	1	1061	537	0.2	4.791	6	0	1	0	39	7	0	0	0.30683	0	0	11.2169	0	0	0	18
Better-off in Work Credit	North East Yorkshire and the Humber	1	2.8	16.23	24	18	North	1	0	0	0	833	1183	0.1	10.006	7	0	1	0	18	7	0	0	2.29562	0	0	2.78133	0	0	0	24
Better-off in Work Credit	Northumbria	0	3.1	16.24	23	28	North	1	0	0	0	1944	542	0.4	6.841	20	0	1	0	28	7	0	0	2.70136	0	0	11.0072	0	0	0	23
Better-off in Work Credit	Nottinghamshire and Lincolnshire	0	2.7	17.02	19		Midlands	0	1	0	0	2622	808	0.3	10.397	14	0	1			9	0	0	0.89353	0	0	3.2721	0	0	0	19
Better-off in Work Credit	South Tyne and Wear Valley	0	4.3	17.02	20	41	North	1	0	0	0	993	236	0.4	4.802	11	0	1	0	41	5	0	0	2.4115	0	0	13.3132	0	0	0	20
Better-off in Work Credit	South Yorkshire	1	3.5	17.31	17	47	North	1	0	0	0	1652	155	1.1	7.845	14	0	1	0	47	10	0	0	2.07266	0	0	14.3531	0	0	0	17
Better-off in Work Credit	Staffordshire	0	2.2	20.32	3	36	Midlands	0	1	0	0	656	271	0.2	6.501	6	0	1	0	36	7	0	0	1.66897	0	0	6.38517	0	0	0	3
Better-off in Work Credit	Surrey and Sussex	0	1.5	15.65	30	5	South	0	0	0	1	2168	544	0.4	15.376	10	0	1	0	5	10	0	0	1.09781	0	0	3.7526	0	0	0	30
Better-off in Work Credit	Tees Valley	0	4.8	13.63	36	29	North	1	0	0	0	1226	79	1.6	3.984	10	0	1	0	29	6	0	0	4.10392	0	0	18.6145	0	0	0	36
Better-off in Work Credit	Thames Valley (Berks, Bucks, Oxfs)	0	1.4	17.46	16	14	South	0	0	0	1	1052	574	0.2	13.476	11	0	1	0	14	14	0	0	2.68106	0	0	3.32072	0	0	0	16
Better-off in Work Credit	West Of England	0	1.7	18.84	8	1	South	0	0	0	1	1674	133	1.3	6.329	8	0	1	0	1	10	0	0	1.83441	0	0	5.71022	0	0	0	8
Better-off in Work Credit	West Yorkshire	1	3.3	17.7	13	33	North	1	0	0	0	2180	203	1.1	13.065	19	0	1	0	33	16	0	0	1.41906	0	0	2.33295	0	0	0	13
Care First Careers Pilot	Bedfordshire and Hertfordshire	0	2	21.17	8		South	0	0	0	1	1221	288	0.4	10.06	11	0	1			15	0	0	1.55467	0	0	3.32505	0	0	0	8
Care First Careers Pilot	Birmingham and Solihull	0	6.9	13.04	40		Midlands	0	1	0	0	1834	45	4.1	7.242	24	0	1			29	0	0	0.7636	0	0	6.24827	0	0	0	40
Care First Careers Pilot	Black Country	0	5.4	20.39	14		Midlands	0	1	0	0	1636	36	4.5	6.501	16	0	1			19	0	0	5.12844	0	0	4.99923	0	0	0	14
Care First Careers Pilot	Cambridgeshire and Suffolk	0	2	18.93	27		South	0	0	0	1	1639	719	0.2	8.607	8	0	1			11	0	0	1.31637	0	0	4.89601	0	0	0	27
Care First Careers Pilot	Cheshire, Halton and Warrington	1	2.2	18.73	28		North	1	0	0	0	1654	234	0.7	6.067	7	0	1			4	0	0	3.57013	0	0	9.15774	0	0	0	28
Care First Careers Pilot	Coventry and Warwickshire	1	2.9	20.03	17		Midlands	0	1	0	0	734	207	0.4	5.056	11	0	1			14	0	0	1.17089	0	0	7.97666	0	0	0	17
Care First Careers Pilot	Cumbria and Lancashire	0	2.3	22.08	5		North	1	0	0	0	1212	984	0.1	11.59	14	0	1			8	0	0	1.22174	0	0	2.47714	0	0	0	5
Care First Careers Pilot	Derbyshire	0	2.6	20.69	11		Midlands	0	1	0	0	825	262	0.3	5.96	8	0	1			7	0	0	1.04362	0	0	12.0721	0	0	0	11
Care First Careers Pilot	Devon and Cornwall	0	1.7	19.13	25		South	0	0	0	1	684	1027	0.1	9.404	12	0	1			5	0	0	2.47554	0	0	3.83879	0	0	0	25
Care First Careers Pilot	Dorset and Somerset	0	1.3	27.8	2		South	0	0	0	1	841	610	0.1	6.932	9	0	1			6	0	0	2.75534	0	0	6.36757	0	0	0	2
Care First Careers Pilot	Essex	0	2	19.08	26		South	0	0	0	1	879	367	0.2	9.899	10	0	1			10	0	0	1.16173	0	0	3.55793	0	0	0	26
Care First Careers Pilot	Gloucestershire, Wiltshire and Swindon	0	1.5	18.41	29		South	0	0	0	1	847	614	0.1	7.24	6	0	1			7	0	0	2.09392	0	0	8.88536	0	0	0	29
Care First Careers Pilot	Hampshire and Isle of Wight	0	1.6	20.43	13		South	0	0	0	1	706	415	0.2	11.11	6	0	1			8	0	0	2.75248	0	0	4.12781	0	0	0	13
Care First Careers Pilot	Kent	0	2.2	20.7	10		South	0	0	0	1	1380	374	0.4	9.63	7	0	1			9	0	0	1.26168	0	0	5.66978	0	0	0	10
Care First Careers Pilot	Leicestershire, Rutland and Northamptonshire	0	2.5	20	19		Midlands	0	1	0	0	706	490	0.1	9.88	12	0	1			14	0	0	2.51518	0	0	4.81174	0	0	0	19
Care First Careers Pilot	London (Brent, Harrow and Hillingdon)	0	3.5	17.55	32		London	0	0	1	0	900	21	4.3	4.681	8	0	1			39	0	0	2.62551	0	0	7.93207	0	0	0	32
Care First Careers Pilot	London (Central)	0	3.6	17.46	33		London	0	0	1	0	1879	7	26.8	5.527	17	0	1			29	0	0	3.56432	0	0	9.81907	0	0	0	33
Care First Careers Pilot	London (City and East)	0	7.3	15.69	37		London	0	0	1	0	1179	8	14.7	4.534	17	0	1			43	0	0	2.74151	0	0	23.7583	0	0	0	37
Care First Careers Pilot	London (Lambeth, Southwark and Wandsworth)	0	4.3	17.14	35		London	0	0	1	0	1354	9	15	5.698	16	0	1			29	0	0	4.48403	0	0	14.0347	0	0	0	35
Care First Careers Pilot	London (North East)	0	3.8	20.49	12		London	0	0	1	0	834	24	3.5	5.397	11	0	1			31	0	0	3.81323	0	0	7.99333	0	0	0	12
Care First Careers Pilot	London (North)	0	4.5	17.3	34		London	0	0	1	0	1687	20	8.4	5.391	11	0	1			31	0	0	5.76145	0	0	15.4183	0	0	0	34
Care First Careers Pilot	London (South East)	0	3.8	31.11	1		London	0	0	1	0	1119	14	8	4.467	15	0	1			26	0	0	3.98702	0	0	14.1639	0	0	0	1
Care First Careers Pilot	London (South)	0	2	21.99	6		London	0	0	1	0	1748	41	4.3	8.583	12	0	1			23	0	0	4.71513	0	0	6.48841	0	0	0	6
Care First Careers Pilot	London (West)	0	3.3	21.19	7		London	0	0	1	0	781	13	6	4.73	11	0	1			34	0	0	3.64693	0	0	22.2896	0	0	0	7
Care First Careers Pilot	Manchester (Central)	0	4	20.1	16		North	1	0	0	0	1084	32	3.4	5.512	19	0	1			18	0	0	2.39478	0	0	9.082	0	0	0	16
Care First Careers Pilot	Manchester (East and West)	0	3.1	19.69	21		North	1	0	0	0	1458	96	1.5	10.233	16	0	1			11	0	0	3.41933	0	0	6.24059	0	0	0	21
Care First Careers Pilot	Marches	0	2	22.38	4		Midlands	0	1	0	0	1297	741	0.2	7.062	14	0	1			6	0	0	2.18918	0	0	15.6938	0	0	0	4
Care First Careers Pilot	Merseyside	0	5.5	15.09	38		North	1	0	0	0	1000	64	1.6	8.258	16	0	1			6	0	0	1.61298	0	0	4.73965	0	0	0	38
Care First Careers Pilot	Norfolk	0	2.3	18.34	30		South	0	0	0	1	1061	537	0.2	4.791	6	0	1			7	0	0	0.30683	0	0	11.2169	0	0	0	30
Care First Careers Pilot	North East Yorkshire and the Humber	0	2.8	19.24	24		North	1	0	0	0	833	1183	0.1	10.006	10	0	1			7	0	0	2.29562	0	0	2.78133	0	0	0	24
Care First Careers Pilot	Northumbria	0	3.1	20.98	9		North	1	0	0	0	1944	542	0.4	6.841	21	0	1			7	0	0	2.70136	0	0	11.0072	0	0	0	9
Care First Careers Pilot	Nottinghamshire and Lincolnshire	0	2.7	18.27	31		Midlands	0	1	0	0	2622	808	0.3	10.397	16	0	1			9	0	0	0.89353	0	0	3.2721	0	0	0	31
Care First Careers Pilot	South Tyne and Wear Valley	1	4.3	20.32	15		North	1	0	0	0	993	236	0.4	4.802	11	0	1			5	0	0	2.4115	0	0	13.3132	0	0	0	15
Care First Careers Pilot	South Yorkshire	0	3.5	19.39	23		North	1	0	0	0	1652	155	1.1	7.845	15	0	1			10	0	0	2.07266	0	0	14.3531	0	0	0	23
Care First Careers Pilot	Staffordshire	0	2.2	22.52	3		Midlands	0	1	0	0	656	271	0.2	6.501	6	0	1			7	0	0	1.66897	0	0	6.38517	0	0	0	3
Care First Careers Pilot	Surrey and Sussex	0	1.5	16.84	36		South	0	0	0	1	2168	544	0.4	15.376	10	0	1			10	0	0	1.09781	0	0	3.7526	0	0	0	36
Care First Careers Pilot	Tees Valley	0	4.8	14.44	39		North	1	0	0	0	1226	79	1.6	3.984	11	0	1			6	0	0	4.10392	0	0	18.6145	0	0	0	39
Care First Careers Pilot	Thames Valley (Berks, Bucks, Oxfs)	0	1.4	19.73	20		South	0	0	0	1	1052	574	0.2	13.476	12	0	1			14	0	0	2.68106	0	0	3.32072	0	0	0	20
Care First Careers Pilot	West Of England	0	1.7	19.6	22		South	0	0	0	1	1674	133	1.3	6.329	8	0	1			10	0	0	1.83441	0	0	5.71022	0	0	0	22
Care First Careers Pilot	West Yorkshire	0	3.3	20.03	18		North	1	0	0	0	2180	203	1.1	13.065	20	0	1			16	0	0	1.41906	0	0	2.33295	0	0	0	18
City Strategy	Bedfordshire and Hertfordshire	0	2	14.32	17	21	South	0	0	0	1	1221	288	0.4	10.06	8	0	0	0	0	15	0	0	1.55467	0	0	3.32505	0	0	0	0
City Strategy	Birmingham and Solihull	1	6.9	9.74	40	10	Midlands	0	1	0	0	1834	45	4.1	7.242	18	0	0	0	0	29	0	0	0.7636	0	0	6.24827	0	0	0	0
City Strategy	Black Country	1	5.4	12.06	36	46	Midlands	0	1	0	0	1636	36	4.5	6.501	13	0	0	0	0	19	0	0	5.12844	0	0	4.99923	0	0	0	0
City Strategy	Cambridgeshire and Suffolk	0	2	13.44	26	8	South	0	0	0	1	1639	719	0.2	8.607	5	0	0	0	0	11	0	0	1.31637	0	0	4.89601	0	0	0	0
City Strategy	Cheshire, Halton and Warrington	0	2.2	15.25	11	43	North	1	0	0	0	1654	234	0.7	6.067	5	0	0	0	0	4	0	0	3.57013	0	0	9.15774	0	0	0	0
City Strategy	Coventry and Warwickshire	1	2.9	12.52	30	9	Midlands	0	1	0	0	734	207	0.4	5.056	8	0	0	0	0	14	0	0	1.17089	0	0	7.97666	0	0	0	0
City Strategy	Cumbria and Lancashire	1	2.3	16.25	5		North	1	0	0	0	1212	984	0.1	11.59	12	0	0			8	0	0	1.22174	0	0	2.47714	0	0	0	0
City Strategy	Derbyshire	0	2.6	13.69	23	6	Midlands	0	1	0	0	825	262	0.3	5.96	8	0	0	0	0	7	0	0	1.04362	0	0	12.0721	0	0	0	0
City Strategy	Devon and Cornwall	0	1.7	15.57	8	20	South	0	0	0	1	684	1027	0.1	9.404	12	0	0	0	0	5	0	0	2.47554	0	0	3.83879	0	0	0	0
City Strategy	Dorset and Somerset	0	1.3	18.58	2	2	South	0	0	0	1	841	610	0.1	6.932	8	0	0	0	0	6	0	0	2.75534	0	0	6.36757	0	0	0	0
City Strategy	Essex	0	2	14.27	18	11	South	0	0	0	1	879	367	0.2	9.899	9	0	0	0	0	10	0	0	1.16173	0	0	3.55793	0	0	0	0
City Strategy	Gloucestershire, Wiltshire and Swindon	0	1.5	12.34	32	3	South	0	0	0	1	847	614	0.1	7.24	5	0	0	0	0	7	0	0	2.09392	0	0	8.88536	0	0	0	0
City Strategy	Hampshire and Isle of Wight	0	1.6	15.36	10	7	South	0	0	0	1	706	415	0.2	11.11	5	0	0	0	0	8	0	0	2.75248	0	0	4.12781	0	0	0	0
City Strategy	Kent	0	2.2	13.12	27	23	South	0	0	0	1	1380	374	0.4	9.63	6	0	0	0	0	9	0	0	1.26168	0	0	5.66978	0	0	0	0
City Strategy	Leicestershire, Rutland and Northamptonshire	1	2.5	13.68	24		Midlands	0	1	0	0	706	490	0.1	9.88	11	0	0			14	0	0	2.51518	0	0	4.81174	0	0	0	0
City Strategy	London (Brent, Harrow and Hillingdon)	0	3.5	12.25	35		London	0	0	1	0	900	21	4.3	4.681	8	0	0			39	0	0	2.62551	0	0	7.93207	0	0	0	0
City Strategy	London (Central)	0	3.6	11.93	37	13	London	0	0	1	0	1879	7	26.8	5.527	12	0	0	0	0	29	0	0	3.56432	0	0	9.81907	0	0	0	0
City Strategy	London (City and East)	1	7.3	11.19	39	17	London	0	0	1	0	1179	8	14.7	4.534	15	0	0	0	0	43	0	0	2.74151	0	0	23.7583	0	0	0	0
City Strategy	London (Lambeth, Southwark and Wandsworth)	0	4.3	12.34	33	27	London	0	0	1	0	1354	9	15	5.698	11	0	0	0	0	29	0	0	4.48403	0	0	14.0347	0	0	0	0
City Strategy	London (North East)	0	3.8	12.62	29		London	0	0	1	0	834	24	3.5	5.397	9	0	0			31	0	0	3.81323	0	0	7.99333	0	0	0	0
City Strategy	London (North)	0	4.5	12.77	28		London	0	0	1	0	1687	20	8.4	5.391	9	0	0			31	0	0	5.76145	0	0	15.4183	0	0	0	0
City Strategy	London (South East)	0	3.8	19.81	1		London	0	0	1	0	1119	14	8	4.467	13	0	0			26	0	0	3.98702	0	0	14.1639	0	0	0	0
City Strategy	London (South)	0	2	16.57	3		London	0	0	1	0	1748	41	4.3	8.583	11	0	0			23	0	0	4.71513	0	0	6.48841	0	0	0	0
City Strategy	London (West)	1	3.3	15.04	13		London	0	0	1	0	781	13	6	4.73	7	0	0			34	0	0	3.64693	0	0	22.2896	0	0	0	0
City Strategy	Manchester (Central)	1	4	14.68	15	42	North	1	0	0	0	1084	32	3.4	5.512	15	0	0	0	0	18	0	0	2.39478	0	0	9.082	0	0	0	0
City Strategy	Manchester (East and West)	0	3.1	15.7	7	37	North	1	0	0	0	1458	96	1.5	10.233	13	0	0	0	0	11	0	0	3.41933	0	0	6.24059	0	0	0	0
City Strategy	Marches	0	2	16.27	4	32	Midlands	0	1	0	0	1297	741	0.2	7.062	10	0	0	0	0	6	0	0	2.18918	0	0	15.6938	0	0	0	0
City Strategy	Merseyside	1	5.5	11.7	38		North	1	0	0	0	1000	64	1.6	8.258	13	0	0			6	0	0	1.61298	0	0	4.73965	0	0	0	0
City Strategy	Norfolk	0	2.3	12.5	31	39	South	0	0	0	1	1061	537	0.2	4.791	4	0	0	0	0	7	0	0	0.30683	0	0	11.2169	0	0	0	0
City Strategy	North East Yorkshire and the Humber	0	2.8	14.13	20	18	North	1	0	0	0	833	1183	0.1	10.006	5	0	0	0	0	7	0	0	2.29562	0	0	2.78133	0	0	0	0
City Strategy	Northumbria	0	3.1	14.14	19	28	North	1	0	0	0	1944	542	0.4	6.841	19	0	0	0	0	7	0	0	2.70136	0	0	11.0072	0	0	0	0
City Strategy	Nottinghamshire and Lincolnshire	1	2.7	13.76	22		Midlands	0	1	0	0	2622	808	0.3	10.397	12	0	0			9	0	0	0.89353	0	0	3.2721	0	0	0	0
City Strategy	South Tyne and Wear Valley	1	4.3	14.4	16	41	North	1	0	0	0	993	236	0.4	4.802	9	0	0	0	0	5	0	0	2.4115	0	0	13.3132	0	0	0	0
City Strategy	South Yorkshire	1	3.5	14.87	14	47	North	1	0	0	0	1652	155	1.1	7.845	13	0	0	0	0	10	0	0	2.07266	0	0	14.3531	0	0	0	0
City Strategy	Staffordshire	0	2.2	15.4	9	36	Midlands	0	1	0	0	656	271	0.2	6.501	4	0	0	0	0	7	0	0	1.66897	0	0	6.38517	0	0	0	0
City Strategy	Surrey and Sussex	0	1.5	13.49	25	5	South	0	0	0	1	2168	544	0.4	15.376	10	0	0	0	0	10	0	0	1.09781	0	0	3.7526	0	0	0	0
City Strategy	Tees Valley	0	4.8	12.3	34	29	North	1	0	0	0	1226	79	1.6	3.984	9	0	0	0	0	6	0	0	4.10392	0	0	18.6145	0	0	0	0
City Strategy	Thames Valley (Berks, Bucks, Oxfs)	0	1.4	15.94	6	14	South	0	0	0	1	1052	574	0.2	13.476	9	0	0	0	0	14	0	0	2.68106	0	0	3.32072	0	0	0	0
City Strategy	West Of England	0	1.7	15.15	12	1	South	0	0	0	1	1674	133	1.3	6.329	7	0	0	0	0	10	0	0	1.83441	0	0	5.71022	0	0	0	0
City Strategy	West Yorkshire	0	3.3	13.98	21	33	North	1	0	0	0	2180	203	1.1	13.065	18	0	0	0	0	16	0	0	1.41906	0	0	2.33295	0	0	0	0
Drug and Alcohol Addiction Trial	Bedfordshire and Hertfordshire		2				South	0	0	0	1	1221	288	0.4	10.06	11	0	1			15	0	0	1.55467	0	0	3.32505	0	0
Drug and Alcohol Addiction Trial	Birmingham and Solihull		6.9				Midlands	0	1	0	0	1834	45	4.1	7.242	25	0	1			29	0	0	0.7636	0	0	6.24827	0	0
Drug and Alcohol Addiction Trial	Black Country		5.4				Midlands	0	1	0	0	1636	36	4.5	6.501	17	0	1			19	0	0	5.12844	0	0	4.99923	0	0
Drug and Alcohol Addiction Trial	Cambridgeshire and Suffolk		2				South	0	0	0	1	1639	719	0.2	8.607	8	0	1			11	0	0	1.31637	0	0	4.89601	0	0
Drug and Alcohol Addiction Trial	Cheshire, Halton and Warrington		2.2				North	1	0	0	0	1654	234	0.7	6.067	8	0	1			4	0	0	3.57013	0	0	9.15774	0	0
Drug and Alcohol Addiction Trial	Coventry and Warwickshire		2.9				Midlands	0	1	0	0	734	207	0.4	5.056	13	0	1			14	0	0	1.17089	0	0	7.97666	0	0
Drug and Alcohol Addiction Trial	Cumbria and Lancashire		2.3				North	1	0	0	0	1212	984	0.1	11.59	14	0	1			8	0	0	1.22174	0	0	2.47714	0	0
Drug and Alcohol Addiction Trial	Derbyshire		2.6				Midlands	0	1	0	0	825	262	0.3	5.96	8	0	1			7	0	0	1.04362	0	0	12.0721	0	0
Drug and Alcohol Addiction Trial	Devon and Cornwall		1.7				South	0	0	0	1	684	1027	0.1	9.404	12	0	1			5	0	0	2.47554	0	0	3.83879	0	0
Drug and Alcohol Addiction Trial	Dorset and Somerset		1.3				South	0	0	0	1	841	610	0.1	6.932	9	0	1			6	0	0	2.75534	0	0	6.36757	0	0
Drug and Alcohol Addiction Trial	Essex		2				South	0	0	0	1	879	367	0.2	9.899	10	0	1			10	0	0	1.16173	0	0	3.55793	0	0
Drug and Alcohol Addiction Trial	Gloucestershire, Wiltshire and Swindon		1.5				South	0	0	0	1	847	614	0.1	7.24	6	0	1			7	0	0	2.09392	0	0	8.88536	0	0
Drug and Alcohol Addiction Trial	Hampshire and Isle of Wight		1.6				South	0	0	0	1	706	415	0.2	11.11	6	0	1			8	0	0	2.75248	0	0	4.12781	0	0
Drug and Alcohol Addiction Trial	Kent		2.2				South	0	0	0	1	1380	374	0.4	9.63	8	0	1			9	0	0	1.26168	0	0	5.66978	0	0
Drug and Alcohol Addiction Trial	Leicestershire, Rutland and Northamptonshire		2.5				Midlands	0	1	0	0	706	490	0.1	9.88	13	0	1			14	0	0	2.51518	0	0	4.81174	0	0
Drug and Alcohol Addiction Trial	London (Brent, Harrow and Hillingdon)		3.5				London	0	0	1	0	900	21	4.3	4.681	8	0	1			39	0	0	2.62551	0	0	7.93207	0	0
Drug and Alcohol Addiction Trial	London (Central)		3.6				London	0	0	1	0	1879	7	26.8	5.527	18	0	1			29	0	0	3.56432	0	0	9.81907	0	0
Drug and Alcohol Addiction Trial	London (City and East)		7.3				London	0	0	1	0	1179	8	14.7	4.534	17	0	1			43	0	0	2.74151	0	0	23.7583	0	0
Drug and Alcohol Addiction Trial	London (Lambeth, Southwark and Wandsworth)		4.3				London	0	0	1	0	1354	9	15	5.698	16	0	1			29	0	0	4.48403	0	0	14.0347	0	0
Drug and Alcohol Addiction Trial	London (North East)		3.8				London	0	0	1	0	834	24	3.5	5.397	11	0	1			31	0	0	3.81323	0	0	7.99333	0	0
Drug and Alcohol Addiction Trial	London (North)		4.5				London	0	0	1	0	1687	20	8.4	5.391	11	0	1			31	0	0	5.76145	0	0	15.4183	0	0
Drug and Alcohol Addiction Trial	London (South East)		3.8				London	0	0	1	0	1119	14	8	4.467	15	0	1			26	0	0	3.98702	0	0	14.1639	0	0
Drug and Alcohol Addiction Trial	London (South)		2				London	0	0	1	0	1748	41	4.3	8.583	12	0	1			23	0	0	4.71513	0	0	6.48841	0	0
Drug and Alcohol Addiction Trial	London (West)		3.3				London	0	0	1	0	781	13	6	4.73	11	0	1			34	0	0	3.64693	0	0	22.2896	0	0
Drug and Alcohol Addiction Trial	Manchester (Central)		4				North	1	0	0	0	1084	32	3.4	5.512	20	0	1			18	0	0	2.39478	0	0	9.082	0	0
Drug and Alcohol Addiction Trial	Manchester (East and West)		3.1				North	1	0	0	0	1458	96	1.5	10.233	17	0	1			11	0	0	3.41933	0	0	6.24059	0	0
Drug and Alcohol Addiction Trial	Marches		2				Midlands	0	1	0	0	1297	741	0.2	7.062	14	0	1			6	0	0	2.18918	0	0	15.6938	0	0
Drug and Alcohol Addiction Trial	Merseyside		5.5				North	1	0	0	0	1000	64	1.6	8.258	16	0	1			6	0	0	1.61298	0	0	4.73965	0	0
Drug and Alcohol Addiction Trial	Norfolk		2.3				South	0	0	0	1	1061	537	0.2	4.791	6	0	1			7	0	0	0.30683	0	0	11.2169	0	0
Drug and Alcohol Addiction Trial	North East Yorkshire and the Humber		2.8				North	1	0	0	0	833	1183	0.1	10.006	10	0	1			7	0	0	2.29562	0	0	2.78133	0	0
Drug and Alcohol Addiction Trial	Northumbria		3.1				North	1	0	0	0	1944	542	0.4	6.841	21	0	1			7	0	0	2.70136	0	0	11.0072	0	0
Drug and Alcohol Addiction Trial	Nottinghamshire and Lincolnshire		2.7				Midlands	0	1	0	0	2622	808	0.3	10.397	17	0	1			9	0	0	0.89353	0	0	3.2721	0	0
Drug and Alcohol Addiction Trial	South Tyne and Wear Valley		4.3				North	1	0	0	0	993	236	0.4	4.802	12	0	1			5	0	0	2.4115	0	0	13.3132	0	0
Drug and Alcohol Addiction Trial	South Yorkshire		3.5				North	1	0	0	0	1652	155	1.1	7.845	15	0	1			10	0	0	2.07266	0	0	14.3531	0	0
Drug and Alcohol Addiction Trial	Staffordshire		2.2				Midlands	0	1	0	0	656	271	0.2	6.501	7	0	1			7	0	0	1.66897	0	0	6.38517	0	0
Drug and Alcohol Addiction Trial	Surrey and Sussex		1.5				South	0	0	0	1	2168	544	0.4	15.376	10	0	1			10	0	0	1.09781	0	0	3.7526	0	0
Drug and Alcohol Addiction Trial	Tees Valley		4.8				North	1	0	0	0	1226	79	1.6	3.984	11	0	1			6	0	0	4.10392	0	0	18.6145	0	0
Drug and Alcohol Addiction Trial	Thames Valley (Berks, Bucks, Oxfs)		1.4				South	0	0	0	1	1052	574	0.2	13.476	12	0	1			14	0	0	2.68106	0	0	3.32072	0	0
Drug and Alcohol Addiction Trial	West Of England		1.7				South	0	0	0	1	1674	133	1.3	6.329	8	0	1			10	0	0	1.83441	0	0	5.71022	0	0
Drug and Alcohol Addiction Trial	West Yorkshire		3.3				North	1	0	0	0	2180	203	1.1	13.065	21	0	1			16	0	0	1.41906	0	0	2.33295	0	0
Employment Advisors	Bedfordshire and Hertfordshire	0	2	21.17	8		South	0	0	0	1	1221	288	0.4	10.06	11	0	0			15	0	0	1.55467	0	0	3.32505	1	3.32505	0	0
Employment Advisors	Birmingham and Solihull	0	6.9	13.04	40		Midlands	0	1	0	0	1834	45	4.1	7.242	23	0	0			29	0	0	0.7636	0	0	6.24827	1	6.24827	0	0
Employment Advisors	Black Country	0	5.4	20.39	14		Midlands	0	1	0	0	1636	36	4.5	6.501	16	0	0			19	0	0	5.12844	0	0	4.99923	1	4.99923	0	0
Employment Advisors	Cambridgeshire and Suffolk	1	2	18.93	27		South	0	0	0	1	1639	719	0.2	8.607	7	0	0			11	0	0	1.31637	0	0	4.89601	1	4.89601	0	0
Employment Advisors	Cheshire, Halton and Warrington	1	2.2	18.73	28		North	1	0	0	0	1654	234	0.7	6.067	6	0	0			4	0	0	3.57013	0	0	9.15774	1	9.15774	0	0
Employment Advisors	Coventry and Warwickshire	0	2.9	20.03	17		Midlands	0	1	0	0	734	207	0.4	5.056	11	0	0			14	0	0	1.17089	0	0	7.97666	1	7.97666	0	0
Employment Advisors	Cumbria and Lancashire	0	2.3	22.08	5		North	1	0	0	0	1212	984	0.1	11.59	14	0	0			8	0	0	1.22174	0	0	2.47714	1	2.47714	0	0
Employment Advisors	Derbyshire	0	2.6	20.69	11		Midlands	0	1	0	0	825	262	0.3	5.96	8	0	0			7	0	0	1.04362	0	0	12.0721	1	12.0721	0	0
Employment Advisors	Devon and Cornwall	0	1.7	19.13	25		South	0	0	0	1	684	1027	0.1	9.404	12	0	0			5	0	0	2.47554	0	0	3.83879	1	3.83879	0	0
Employment Advisors	Dorset and Somerset	0	1.3	27.8	2		South	0	0	0	1	841	610	0.1	6.932	9	0	0			6	0	0	2.75534	0	0	6.36757	1	6.36757	0	0
Employment Advisors	Essex	0	2	19.08	26		South	0	0	0	1	879	367	0.2	9.899	10	0	0			10	0	0	1.16173	0	0	3.55793	1	3.55793	0	0
Employment Advisors	Gloucestershire, Wiltshire and Swindon	1	1.5	18.41	29		South	0	0	0	1	847	614	0.1	7.24	5	0	0			7	0	0	2.09392	0	0	8.88536	1	8.88536	0	0
Employment Advisors	Hampshire and Isle of Wight	0	1.6	20.43	13		South	0	0	0	1	706	415	0.2	11.11	6	0	0			8	0	0	2.75248	0	0	4.12781	1	4.12781	0	0
Employment Advisors	Kent	1	2.2	20.7	10		South	0	0	0	1	1380	374	0.4	9.63	6	0	0			9	0	0	1.26168	0	0	5.66978	1	5.66978	0	0
Employment Advisors	Leicestershire, Rutland and Northamptonshire	0	2.5	20	19		Midlands	0	1	0	0	706	490	0.1	9.88	12	0	0			14	0	0	2.51518	0	0	4.81174	1	4.81174	0	0
Employment Advisors	London (Brent, Harrow and Hillingdon)	0	3.5	17.55	32		London	0	0	1	0	900	21	4.3	4.681	8	0	0			39	0	0	2.62551	0	0	7.93207	1	7.93207	0	0
Employment Advisors	London (Central)	1	3.6	17.46	33		London	0	0	1	0	1879	7	26.8	5.527	15	0	0			29	0	0	3.56432	0	0	9.81907	1	9.81907	0	0
Employment Advisors	London (City and East)	0	7.3	15.69	37		London	0	0	1	0	1179	8	14.7	4.534	16	0	0			43	0	0	2.74151	0	0	23.7583	1	23.7583	0	0
Employment Advisors	London (Lambeth, Southwark and Wandsworth)	0	4.3	17.14	35		London	0	0	1	0	1354	9	15	5.698	15	0	0			29	0	0	4.48403	0	0	14.0347	1	14.0347	0	0
Employment Advisors	London (North East)	0	3.8	20.49	12		London	0	0	1	0	834	24	3.5	5.397	10	0	0			31	0	0	3.81323	0	0	7.99333	1	7.99333	0	0
Employment Advisors	London (North)	0	4.5	17.3	34		London	0	0	1	0	1687	20	8.4	5.391	10	0	0			31	0	0	5.76145	0	0	15.4183	1	15.4183	0	0
Employment Advisors	London (South East)	0	3.8	31.11	1		London	0	0	1	0	1119	14	8	4.467	14	0	0			26	0	0	3.98702	0	0	14.1639	1	14.1639	0	0
Employment Advisors	London (South)	0	2	21.99	6		London	0	0	1	0	1748	41	4.3	8.583	12	0	0			23	0	0	4.71513	0	0	6.48841	1	6.48841	0	0
Employment Advisors	London (West)	1	3.3	21.19	7		London	0	0	1	0	781	13	6	4.73	9	0	0			34	0	0	3.64693	0	0	22.2896	1	22.2896	0	0
Employment Advisors	Manchester (Central)	0	4	20.1	16		North	1	0	0	0	1084	32	3.4	5.512	18	0	0			18	0	0	2.39478	0	0	9.082	1	9.082	0	0
Employment Advisors	Manchester (East and West)	0	3.1	19.69	21		North	1	0	0	0	1458	96	1.5	10.233	16	0	0			11	0	0	3.41933	0	0	6.24059	1	6.24059	0	0
Employment Advisors	Marches	1	2	22.38	4		Midlands	0	1	0	0	1297	741	0.2	7.062	13	0	0			6	0	0	2.18918	0	0	15.6938	1	15.6938	0	0
Employment Advisors	Merseyside	0	5.5	15.09	38		North	1	0	0	0	1000	64	1.6	8.258	15	0	0			6	0	0	1.61298	0	0	4.73965	1	4.73965	0	0
Employment Advisors	Norfolk	0	2.3	18.34	30		South	0	0	0	1	1061	537	0.2	4.791	6	0	0			7	0	0	0.30683	0	0	11.2169	1	11.2169	0	0
Employment Advisors	North East Yorkshire and the Humber	1	2.8	19.24	24		North	1	0	0	0	833	1183	0.1	10.006	8	0	0			7	0	0	2.29562	0	0	2.78133	1	2.78133	0	0
Employment Advisors	Northumbria	1	3.1	20.98	9		North	1	0	0	0	1944	542	0.4	6.841	20	0	0			7	0	0	2.70136	0	0	11.0072	1	11.0072	0	0
Employment Advisors	Nottinghamshire and Lincolnshire	1	2.7	18.27	31		Midlands	0	1	0	0	2622	808	0.3	10.397	14	0	0			9	0	0	0.89353	0	0	3.2721	1	3.2721	0	0
Employment Advisors	South Tyne and Wear Valley	0	4.3	20.32	15		North	1	0	0	0	993	236	0.4	4.802	11	0	0			5	0	0	2.4115	0	0	13.3132	1	13.3132	0	0
Employment Advisors	South Yorkshire	0	3.5	19.39	23		North	1	0	0	0	1652	155	1.1	7.845	15	0	0			10	0	0	2.07266	0	0	14.3531	1	14.3531	0	0
Employment Advisors	Staffordshire	0	2.2	22.52	3		Midlands	0	1	0	0	656	271	0.2	6.501	6	0	0			7	0	0	1.66897	0	0	6.38517	1	6.38517	0	0
Employment Advisors	Surrey and Sussex	0	1.5	16.84	36		South	0	0	0	1	2168	544	0.4	15.376	10	0	0			10	0	0	1.09781	0	0	3.7526	1	3.7526	0	0
Employment Advisors	Tees Valley	0	4.8	14.44	39		North	1	0	0	0	1226	79	1.6	3.984	10	0	0			6	0	0	4.10392	0	0	18.6145	1	18.6145	0	0
Employment Advisors	Thames Valley (Berks, Bucks, Oxfs)	1	1.4	19.73	20		South	0	0	0	1	1052	574	0.2	13.476	11	0	0			14	0	0	2.68106	0	0	3.32072	1	3.32072	0	0
Employment Advisors	West Of England	0	1.7	19.6	22		South	0	0	0	1	1674	133	1.3	6.329	8	0	0			10	0	0	1.83441	0	0	5.71022	1	5.71022	0	0
Employment Advisors	West Yorkshire	0	3.3	20.03	18		North	1	0	0	0	2180	203	1.1	13.065	20	0	0			16	0	0	1.41906	0	0	2.33295	1	2.33295	0	0
Employment Retention and Advancement (ERA)	Bedfordshire and Hertfordshire	0	2	18.56	12		South	0	0	0	1	1221	288	0.4	10.06	5	0	1			15	0	0	1.55467	1	1.55467	3.32505	0	0	0	12
Employment Retention and Advancement (ERA)	Birmingham and Solihull	0	6.9	13.11	39		Midlands	0	1	0	0	1834	45	4.1	7.242	9	0	1			29	0	0	0.7636	1	0.7636	6.24827	0	0	0	39
Employment Retention and Advancement (ERA)	Black Country	0	5.4	16.57	26		Midlands	0	1	0	0	1636	36	4.5	6.501	8	0	1			19	0	0	5.12844	1	5.12844	4.99923	0	0	0	26
Employment Retention and Advancement (ERA)	Cambridgeshire and Suffolk	0	2	17.78	17		South	0	0	0	1	1639	719	0.2	8.607	3	0	1			11	0	0	1.31637	1	1.31637	4.89601	0	0	0	17
Employment Retention and Advancement (ERA)	Cheshire, Halton and Warrington	0	2.2	20.33	6		North	1	0	0	0	1654	234	0.7	6.067	3	0	1			4	0	0	3.57013	1	3.57013	9.15774	0	0	0	6
Employment Retention and Advancement (ERA)	Coventry and Warwickshire	0	2.9	16.58	24		Midlands	0	1	0	0	734	207	0.4	5.056	6	0	1			14	0	0	1.17089	1	1.17089	7.97666	0	0	0	24
Employment Retention and Advancement (ERA)	Cumbria and Lancashire	0	2.3	19.87	7		North	1	0	0	0	1212	984	0.1	11.59	7	0	1			8	0	0	1.22174	1	1.22174	2.47714	0	0	0	7
Employment Retention and Advancement (ERA)	Derbyshire	1	2.6	17.69	20		Midlands	0	1	0	0	825	262	0.3	5.96	4	0	1			7	0	0	1.04362	1	1.04362	12.0721	0	0	0	20
Employment Retention and Advancement (ERA)	Devon and Cornwall	0	1.7	18.69	11		South	0	0	0	1	684	1027	0.1	9.404	9	0	1			5	0	0	2.47554	1	2.47554	3.83879	0	0	0	11
Employment Retention and Advancement (ERA)	Dorset and Somerset	0	1.3	20.57	4		South	0	0	0	1	841	610	0.1	6.932	3	0	1			6	0	0	2.75534	1	2.75534	6.36757	0	0	0	4
Employment Retention and Advancement (ERA)	Essex	0	2	19.22	10		South	0	0	0	1	879	367	0.2	9.899	5	0	1			10	0	0	1.16173	1	1.16173	3.55793	0	0	0	10
Employment Retention and Advancement (ERA)	Gloucestershire, Wiltshire and Swindon	0	1.5	16.55	27		South	0	0	0	1	847	614	0.1	7.24	2	0	1			7	0	0	2.09392	1	2.09392	8.88536	0	0	0	27
Employment Retention and Advancement (ERA)	Hampshire and Isle of Wight	0	1.6	20.82	3		South	0	0	0	1	706	415	0.2	11.11	3	0	1			8	0	0	2.75248	1	2.75248	4.12781	0	0	0	3
Employment Retention and Advancement (ERA)	Kent	0	2.2	17.8	16		South	0	0	0	1	1380	374	0.4	9.63	4	0	1			9	0	0	1.26168	1	1.26168	5.66978	0	0	0	16
Employment Retention and Advancement (ERA)	Leicestershire, Rutland and Northamptonshire	0	2.5	17.41	22		Midlands	0	1	0	0	706	490	0.1	9.88	4	0	1			14	0	0	2.51518	1	2.51518	4.81174	0	0	0	22
Employment Retention and Advancement (ERA)	London (Brent, Harrow and Hillingdon)	0	3.5	13.33	37		London	0	0	1	0	900	21	4.3	4.681	4	0	1			39	0	0	2.62551	1	2.62551	7.93207	0	0	0	37
Employment Retention and Advancement (ERA)	London (Central)	0	3.6	13.16	38		London	0	0	1	0	1879	7	26.8	5.527	6	0	1			29	0	0	3.56432	1	3.56432	9.81907	0	0	0	38
Employment Retention and Advancement (ERA)	London (City and East)	1	7.3	15.29	32		London	0	0	1	0	1179	8	14.7	4.534	8	0	1			43	0	0	2.74151	1	2.74151	23.7583	0	0	0	32
Employment Retention and Advancement (ERA)	London (Lambeth, Southwark and Wandsworth)	0	4.3	12.32	40		London	0	0	1	0	1354	9	15	5.698	6	0	1			29	0	0	4.48403	1	4.48403	14.0347	0	0	0	40
Employment Retention and Advancement (ERA)	London (North East)	0	3.8	16.23	28		London	0	0	1	0	834	24	3.5	5.397	5	0	1			31	0	0	3.81323	1	3.81323	7.99333	0	0	0	28
Employment Retention and Advancement (ERA)	London (North)	0	4.5	14.38	35		London	0	0	1	0	1687	20	8.4	5.391	4	0	1			31	0	0	5.76145	1	5.76145	15.4183	0	0	0	35
Employment Retention and Advancement (ERA)	London (South East)	0	3.8	20.49	5		London	0	0	1	0	1119	14	8	4.467	7	0	1			26	0	0	3.98702	1	3.98702	14.1639	0	0	0	5
Employment Retention and Advancement (ERA)	London (South)	0	2	14.84	34		London	0	0	1	0	1748	41	4.3	8.583	4	0	1			23	0	0	4.71513	1	4.71513	6.48841	0	0	0	34
Employment Retention and Advancement (ERA)	London (West)	0	3.3	15.68	30		London	0	0	1	0	781	13	6	4.73	3	0	1			34	0	0	3.64693	1	3.64693	22.2896	0	0	0	30
Employment Retention and Advancement (ERA)	Manchester (Central)	1	4	15.06	33		North	1	0	0	0	1084	32	3.4	5.512	8	0	1			18	0	0	2.39478	1	2.39478	9.082	0	0	0	33
Employment Retention and Advancement (ERA)	Manchester (East and West)	0	3.1	19.54	9		North	1	0	0	0	1458	96	1.5	10.233	7	0	1			11	0	0	3.41933	1	3.41933	6.24059	0	0	0	9
Employment Retention and Advancement (ERA)	Marches	0	2	21.13	1		Midlands	0	1	0	0	1297	741	0.2	7.062	7	0	1			6	0	0	2.18918	1	2.18918	15.6938	0	0	0	1
Employment Retention and Advancement (ERA)	Merseyside	0	5.5	14.37	36		North	1	0	0	0	1000	64	1.6	8.258	9	0	1			6	0	0	1.61298	1	1.61298	4.73965	0	0	0	36
Employment Retention and Advancement (ERA)	Norfolk	0	2.3	17.77	18		South	0	0	0	1	1061	537	0.2	4.791	2	0	1			7	0	0	0.30683	1	0.30683	11.2169	0	0	0	18
Employment Retention and Advancement (ERA)	North East Yorkshire and the Humber	0	2.8	17.9	15		North	1	0	0	0	833	1183	0.1	10.006	3	0	1			7	0	0	2.29562	1	2.29562	2.78133	0	0	0	15
Employment Retention and Advancement (ERA)	Northumbria	1	3.1	15.31	31		North	1	0	0	0	1944	542	0.4	6.841	11	0	1			7	0	0	2.70136	1	2.70136	11.0072	0	0	0	31
Employment Retention and Advancement (ERA)	Nottinghamshire and Lincolnshire	0	2.7	18.26	14		Midlands	0	1	0	0	2622	808	0.3	10.397	8	0	1			9	0	0	0.89353	1	0.89353	3.2721	0	0	0	14
Employment Retention and Advancement (ERA)	South Tyne and Wear Valley	0	4.3	17.66	21		North	1	0	0	0	993	236	0.4	4.802	8	0	1			5	0	0	2.4115	1	2.4115	13.3132	0	0	0	21
Employment Retention and Advancement (ERA)	South Yorkshire	0	3.5	17.72	19		North	1	0	0	0	1652	155	1.1	7.845	10	0	1			10	0	0	2.07266	1	2.07266	14.3531	0	0	0	19
Employment Retention and Advancement (ERA)	Staffordshire	0	2.2	20.86	2		Midlands	0	1	0	0	656	271	0.2	6.501	1	0	1			7	0	0	1.66897	1	1.66897	6.38517	0	0	0	2
Employment Retention and Advancement (ERA)	Surrey and Sussex	0	1.5	16.58	25		South	0	0	0	1	2168	544	0.4	15.376	5	0	1			10	0	0	1.09781	1	1.09781	3.7526	0	0	0	25
Employment Retention and Advancement (ERA)	Tees Valley	0	4.8	16.66	23		North	1	0	0	0	1226	79	1.6	3.984	6	0	1			6	0	0	4.10392	1	4.10392	18.6145	0	0	0	23
Employment Retention and Advancement (ERA)	Thames Valley (Berks, Bucks, Oxfs)	0	1.4	16.03	29		South	0	0	0	1	1052	574	0.2	13.476	4	0	1			14	0	0	2.68106	1	2.68106	3.32072	0	0	0	29
Employment Retention and Advancement (ERA)	West Of England	0	1.7	19.76	8		South	0	0	0	1	1674	133	1.3	6.329	6	0	1			10	0	0	1.83441	1	1.83441	5.71022	0	0	0	8
Employment Retention and Advancement (ERA)	West Yorkshire	0	3.3	18.49	13		North	1	0	0	0	2180	203	1.1	13.065	9	0	1			16	0	0	1.41906	1	1.41906	2.33295	0	0	0	13
Employment Zones	Bedfordshire and Hertfordshire	0	2	18.12	7		South	0	0	0	1	1221	288	0.4	10.06	1	0	0			15	0	0	1.55467	0	0	3.32505	0	0	0	0
Employment Zones	Birmingham and Solihull	0	6.9	11.33	39		Midlands	0	1	0	0	1834	45	4.1	7.242	0	0	0			29	0	0	0.7636	0	0	6.24827	0	0	0	0
Employment Zones	Black Country	0	5.4	15.3	22		Midlands	0	1	0	0	1636	36	4.5	6.501	1	0	0			19	0	0	5.12844	0	0	4.99923	0	0	0	0
Employment Zones	Cambridgeshire and Suffolk	0	2	17.45	13		South	0	0	0	1	1639	719	0.2	8.607	1	0	0			11	0	0	1.31637	0	0	4.89601	0	0	0	0
Employment Zones	Cheshire, Halton and Warrington	0	2.2	17.91	9		North	1	0	0	0	1654	234	0.7	6.067	1	0	0			4	0	0	3.57013	0	0	9.15774	0	0	0	0
Employment Zones	Coventry and Warwickshire	0	2.9	14.18	29		Midlands	0	1	0	0	734	207	0.4	5.056	1	0	0			14	0	0	1.17089	0	0	7.97666	0	0	0	0
Employment Zones	Cumbria and Lancashire	0	2.3	17.8	11		North	1	0	0	0	1212	984	0.1	11.59	1	0	0			8	0	0	1.22174	0	0	2.47714	0	0	0	0
Employment Zones	Derbyshire	0	2.6	18.54	4		Midlands	0	1	0	0	825	262	0.3	5.96	1	0	0			7	0	0	1.04362	0	0	12.0721	0	0	0	0
Employment Zones	Devon and Cornwall	1	1.7	14.06	30		South	0	0	0	1	684	1027	0.1	9.404	1	0	0			5	0	0	2.47554	0	0	3.83879	0	0	0	0
Employment Zones	Dorset and Somerset	0	1.3	15.88	20		South	0	0	0	1	841	610	0.1	6.932	0	0	0			6	0	0	2.75534	0	0	6.36757	0	0	0	0
Employment Zones	Essex	0	2	15.78	21		South	0	0	0	1	879	367	0.2	9.899	0	0	0			10	0	0	1.16173	0	0	3.55793	0	0	0	0
Employment Zones	Gloucestershire, Wiltshire and Swindon	0	1.5	17	16		South	0	0	0	1	847	614	0.1	7.24	0	0	0			7	0	0	2.09392	0	0	8.88536	0	0	0	0
Employment Zones	Hampshire and Isle of Wight	0	1.6	16.44	18		South	0	0	0	1	706	415	0.2	11.11	0	0	0			8	0	0	2.75248	0	0	4.12781	0	0	0	0
Employment Zones	Kent	0	2.2	16.25	19		South	0	0	0	1	1380	374	0.4	9.63	0	0	0			9	0	0	1.26168	0	0	5.66978	0	0	0	0
Employment Zones	Leicestershire, Rutland and Northamptonshire	0	2.5	18.37	6		Midlands	0	1	0	0	706	490	0.1	9.88	0	0	0			14	0	0	2.51518	0	0	4.81174	0	0	0	0
Employment Zones	London (Brent, Harrow and Hillingdon)	0	3.5	13.85	32		London	0	0	1	0	900	21	4.3	4.681	0	0	0			39	0	0	2.62551	0	0	7.93207	0	0	0	0
Employment Zones	London (Central)	0	3.6	11.74	37		London	0	0	1	0	1879	7	26.8	5.527	0	0	0			29	0	0	3.56432	0	0	9.81907	0	0	0	0
Employment Zones	London (City and East)	0	7.3	14.84	26		London	0	0	1	0	1179	8	14.7	4.534	0	0	0			43	0	0	2.74151	0	0	23.7583	0	0	0	0
Employment Zones	London (Lambeth, Southwark and Wandsworth)	0	4.3	13.26	33		London	0	0	1	0	1354	9	15	5.698	1	0	0			29	0	0	4.48403	0	0	14.0347	0	0	0	0
Employment Zones	London (North East)	0	3.8	17.96	8		London	0	0	1	0	834	24	3.5	5.397	0	0	0			31	0	0	3.81323	0	0	7.99333	0	0	0	0
Employment Zones	London (North)	0	4.5	12.54	35		London	0	0	1	0	1687	20	8.4	5.391	0	0	0			31	0	0	5.76145	0	0	15.4183	0	0	0	0
Employment Zones	London (South East)	0	3.8	17.13	14		London	0	0	1	0	1119	14	8	4.467	0	0	0			26	0	0	3.98702	0	0	14.1639	0	0	0	0
Employment Zones	London (South)	0	2	13.89	31		London	0	0	1	0	1748	41	4.3	8.583	0	0	0			23	0	0	4.71513	0	0	6.48841	0	0	0	0
Employment Zones	London (West)	0	3.3	14.87	25		London	0	0	1	0	781	13	6	4.73	0	0	0			34	0	0	3.64693	0	0	22.2896	0	0	0	0
Employment Zones	Manchester (Central)	0	4	14.42	28		North	1	0	0	0	1084	32	3.4	5.512	0	0	0			18	0	0	2.39478	0	0	9.082	0	0	0	0
Employment Zones	Manchester (East and West)	0	3.1	20.9	2		North	1	0	0	0	1458	96	1.5	10.233	0	0	0			11	0	0	3.41933	0	0	6.24059	0	0	0	0
Employment Zones	Marches	0	2	17.07	15		Midlands	0	1	0	0	1297	741	0.2	7.062	1	0	0			6	0	0	2.18918	0	0	15.6938	0	0	0	0
Employment Zones	Merseyside	1	5.5	12.27	36		North	1	0	0	0	1000	64	1.6	8.258	1	0	0			6	0	0	1.61298	0	0	4.73965	0	0	0	0
Employment Zones	Norfolk	0	2.3	14.9	24		South	0	0	0	1	1061	537	0.2	4.791	0	0	0			7	0	0	0.30683	0	0	11.2169	0	0	0	0
Employment Zones	North East Yorkshire and the Humber	0	2.8	14.58	27		North	1	0	0	0	833	1183	0.1	10.006	0	0	0			7	0	0	2.29562	0	0	2.78133	0	0	0	0
Employment Zones	Northumbria	0	3.1	10.95	40		North	1	0	0	0	1944	542	0.4	6.841	1	0	0			7	0	0	2.70136	0	0	11.0072	0	0	0	0
Employment Zones	Nottinghamshire and Lincolnshire	0	2.7	17.91	10		Midlands	0	1	0	0	2622	808	0.3	10.397	0	0	0			9	0	0	0.89353	0	0	3.2721	0	0	0	0
Employment Zones	South Tyne and Wear Valley	0	4.3	19.01	3		North	1	0	0	0	993	236	0.4	4.802	0	0	0			5	0	0	2.4115	0	0	13.3132	0	0	0	0
Employment Zones	South Yorkshire	0	3.5	12.56	34		North	1	0	0	0	1652	155	1.1	7.845	2	0	0			10	0	0	2.07266	0	0	14.3531	0	0	0	0
Employment Zones	Staffordshire	0	2.2	17.69	12		Midlands	0	1	0	0	656	271	0.2	6.501	0	0	0			7	0	0	1.66897	0	0	6.38517	0	0	0	0
Employment Zones	Surrey and Sussex	0	1.5	16.99	17		South	0	0	0	1	2168	544	0.4	15.376	2	0	0			10	0	0	1.09781	0	0	3.7526	0	0	0	0
Employment Zones	Tees Valley	1	4.8	11.38	38		North	1	0	0	0	1226	79	1.6	3.984	0	0	0			6	0	0	4.10392	0	0	18.6145	0	0	0	0
Employment Zones	Thames Valley (Berks, Bucks, Oxfs)	0	1.4	18.49	5		South	0	0	0	1	1052	574	0.2	13.476	0	0	0			14	0	0	2.68106	0	0	3.32072	0	0	0	0
Employment Zones	West Of England	0	1.7	23.5	1		South	0	0	0	1	1674	133	1.3	6.329	0	0	0			10	0	0	1.83441	0	0	5.71022	0	0	0	0
Employment Zones	West Yorkshire	0	3.3	15.01	23		North	1	0	0	0	2180	203	1.1	13.065	0	0	0			16	0	0	1.41906	0	0	2.33295	0	0	0	0
Ethnic Minority Outreach	Bedfordshire and Hertfordshire	1	2	15.49	13		South	0	0	0	1	1221	288	0.4	10.06	4	0	0			15	1	15	1.55467	0	0	3.32505	0	0	0	0
Ethnic Minority Outreach	Birmingham and Solihull	1	6.9	11.34	38		Midlands	0	1	0	0	1834	45	4.1	7.242	6	0	0			29	1	29	0.7636	0	0	6.24827	0	0	0	0
Ethnic Minority Outreach	Black Country	1	5.4	12.67	33		Midlands	0	1	0	0	1636	36	4.5	6.501	4	0	0			19	1	19	5.12844	0	0	4.99923	0	0	0	0
Ethnic Minority Outreach	Cambridgeshire and Suffolk	0	2	15.02	15		South	0	0	0	1	1639	719	0.2	8.607	3	0	0			11	1	11	1.31637	0	0	4.89601	0	0	0	0
Ethnic Minority Outreach	Cheshire, Halton and Warrington	0	2.2	16.5	5		North	1	0	0	0	1654	234	0.7	6.067	3	0	0			4	1	4	3.57013	0	0	9.15774	0	0	0	0
Ethnic Minority Outreach	Coventry and Warwickshire	1	2.9	14.43	20		Midlands	0	1	0	0	734	207	0.4	5.056	4	0	0			14	1	14	1.17089	0	0	7.97666	0	0	0	0
Ethnic Minority Outreach	Cumbria and Lancashire	0	2.3	15.45	14		North	1	0	0	0	1212	984	0.1	11.59	4	0	0			8	1	8	1.22174	0	0	2.47714	0	0	0	0
Ethnic Minority Outreach	Derbyshire	0	2.6	13.83	25		Midlands	0	1	0	0	825	262	0.3	5.96	4	0	0			7	1	7	1.04362	0	0	12.0721	0	0	0	0
Ethnic Minority Outreach	Devon and Cornwall	0	1.7	16.25	8		South	0	0	0	1	684	1027	0.1	9.404	8	0	0			5	1	5	2.47554	0	0	3.83879	0	0	0	0
Ethnic Minority Outreach	Dorset and Somerset	0	1.3	16.51	4		South	0	0	0	1	841	610	0.1	6.932	3	0	0			6	1	6	2.75534	0	0	6.36757	0	0	0	0
Ethnic Minority Outreach	Essex	0	2	16.12	9		South	0	0	0	1	879	367	0.2	9.899	5	0	0			10	1	10	1.16173	0	0	3.55793	0	0	0	0
Ethnic Minority Outreach	Gloucestershire, Wiltshire and Swindon	0	1.5	14.27	23		South	0	0	0	1	847	614	0.1	7.24	2	0	0			7	1	7	2.09392	0	0	8.88536	0	0	0	0
Ethnic Minority Outreach	Hampshire and Isle of Wight	0	1.6	16.87	2		South	0	0	0	1	706	415	0.2	11.11	3	0	0			8	1	8	2.75248	0	0	4.12781	0	0	0	0
Ethnic Minority Outreach	Kent	0	2.2	15.83	12		South	0	0	0	1	1380	374	0.4	9.63	3	0	0			9	1	9	1.26168	0	0	5.66978	0	0	0	0
Ethnic Minority Outreach	Leicestershire, Rutland and Northamptonshire	1	2.5	14.17	24		Midlands	0	1	0	0	706	490	0.1	9.88	3	0	0			14	1	14	2.51518	0	0	4.81174	0	0	0	0
Ethnic Minority Outreach	London (Brent, Harrow and Hillingdon)	1	3.5	12.81	31		London	0	0	1	0	900	21	4.3	4.681	2	0	0			39	1	39	2.62551	0	0	7.93207	0	0	0	0
Ethnic Minority Outreach	London (Central)	0	3.6	10.47	39		London	0	0	1	0	1879	7	26.8	5.527	3	0	0			29	1	29	3.56432	0	0	9.81907	0	0	0	0
Ethnic Minority Outreach	London (City and East)	1	7.3	12.82	30		London	0	0	1	0	1179	8	14.7	4.534	5	0	0			43	1	43	2.74151	0	0	23.7583	0	0	0	0
Ethnic Minority Outreach	London (Lambeth, Southwark and Wandsworth)	1	4.3	10.24	40		London	0	0	1	0	1354	9	15	5.698	3	0	0			29	1	29	4.48403	0	0	14.0347	0	0	0	0
Ethnic Minority Outreach	London (North East)	0	3.8	12.53	34		London	0	0	1	0	834	24	3.5	5.397	3	0	0			31	1	31	3.81323	0	0	7.99333	0	0	0	0
Ethnic Minority Outreach	London (North)	1	4.5	12.8	32		London	0	0	1	0	1687	20	8.4	5.391	2	0	0			31	1	31	5.76145	0	0	15.4183	0	0	0	0
Ethnic Minority Outreach	London (South East)	1	3.8	17.83	1		London	0	0	1	0	1119	14	8	4.467	3	0	0			26	1	26	3.98702	0	0	14.1639	0	0	0	0
Ethnic Minority Outreach	London (South)	0	2	12.06	36		London	0	0	1	0	1748	41	4.3	8.583	2	0	0			23	1	23	4.71513	0	0	6.48841	0	0	0	0
Ethnic Minority Outreach	London (West)	0	3.3	13.54	26		London	0	0	1	0	781	13	6	4.73	2	0	0			34	1	34	3.64693	0	0	22.2896	0	0	0	0
Ethnic Minority Outreach	Manchester (Central)	1	4	11.51	37		North	1	0	0	0	1084	32	3.4	5.512	4	0	0			18	1	18	2.39478	0	0	9.082	0	0	0	0
Ethnic Minority Outreach	Manchester (East and West)	1	3.1	16.02	10		North	1	0	0	0	1458	96	1.5	10.233	5	0	0			11	1	11	3.41933	0	0	6.24059	0	0	0	0
Ethnic Minority Outreach	Marches	0	2	16.86	3		Midlands	0	1	0	0	1297	741	0.2	7.062	7	0	0			6	1	6	2.18918	0	0	15.6938	0	0	0	0
Ethnic Minority Outreach	Merseyside	0	5.5	12.07	35		North	1	0	0	0	1000	64	1.6	8.258	7	0	0			6	1	6	1.61298	0	0	4.73965	0	0	0	0
Ethnic Minority Outreach	Norfolk	0	2.3	14.78	18		South	0	0	0	1	1061	537	0.2	4.791	1	0	0			7	1	7	0.30683	0	0	11.2169	0	0	0	0
Ethnic Minority Outreach	North East Yorkshire and the Humber	0	2.8	14.6	19		North	1	0	0	0	833	1183	0.1	10.006	3	0	0			7	1	7	2.29562	0	0	2.78133	0	0	0	0
Ethnic Minority Outreach	Northumbria	0	3.1	13.31	28		North	1	0	0	0	1944	542	0.4	6.841	9	0	0			7	1	7	2.70136	0	0	11.0072	0	0	0	0
Ethnic Minority Outreach	Nottinghamshire and Lincolnshire	0	2.7	14.96	16		Midlands	0	1	0	0	2622	808	0.3	10.397	7	0	0			9	1	9	0.89353	0	0	3.2721	0	0	0	0
Ethnic Minority Outreach	South Tyne and Wear Valley	0	4.3	13.47	27		North	1	0	0	0	993	236	0.4	4.802	7	0	0			5	1	5	2.4115	0	0	13.3132	0	0	0	0
Ethnic Minority Outreach	South Yorkshire	0	3.5	14.33	21		North	1	0	0	0	1652	155	1.1	7.845	7	0	0			10	1	10	2.07266	0	0	14.3531	0	0	0	0
Ethnic Minority Outreach	Staffordshire	0	2.2	15.98	11		Midlands	0	1	0	0	656	271	0.2	6.501	1	0	0			7	1	7	1.66897	0	0	6.38517	0	0	0	0
Ethnic Minority Outreach	Surrey and Sussex	0	1.5	14.91	17		South	0	0	0	1	2168	544	0.4	15.376	5	0	0			10	1	10	1.09781	0	0	3.7526	0	0	0	0
Ethnic Minority Outreach	Tees Valley	0	4.8	12.88	29		North	1	0	0	0	1226	79	1.6	3.984	5	0	0			6	1	6	4.10392	0	0	18.6145	0	0	0	0
Ethnic Minority Outreach	Thames Valley (Berks, Bucks, Oxfs)	0	1.4	16.27	7		South	0	0	0	1	1052	574	0.2	13.476	4	0	0			14	1	14	2.68106	0	0	3.32072	0	0	0	0
Ethnic Minority Outreach	West Of England	0	1.7	16.49	6		South	0	0	0	1	1674	133	1.3	6.329	4	0	0			10	1	10	1.83441	0	0	5.71022	0	0	0	0
Ethnic Minority Outreach	West Yorkshire	1	3.3	14.33	22		North	1	0	0	0	2180	203	1.1	13.065	6	0	0			16	1	16	1.41906	0	0	2.33295	0	0	0	0
Exit to Work	Bedfordshire and Hertfordshire	0	2	15.62	18		South	0	0	0	1	1221	288	0.4	10.06	8	0	0			15	0	0	1.55467	0	0	3.32505	0	0	0	0
Exit to Work	Birmingham and Solihull	1	6.9	10.2	40		Midlands	0	1	0	0	1834	45	4.1	7.242	16	0	0			29	0	0	0.7636	0	0	6.24827	0	0	0	0
Exit to Work	Black Country	0	5.4	15.54	19		Midlands	0	1	0	0	1636	36	4.5	6.501	13	0	0			19	0	0	5.12844	0	0	4.99923	0	0	0	0
Exit to Work	Cambridgeshire and Suffolk	0	2	13.94	26		South	0	0	0	1	1639	719	0.2	8.607	5	0	0			11	0	0	1.31637	0	0	4.89601	0	0	0	0
Exit to Work	Cheshire, Halton and Warrington	0	2.2	16.68	12		North	1	0	0	0	1654	234	0.7	6.067	5	0	0			4	0	0	3.57013	0	0	9.15774	0	0	0	0
Exit to Work	Coventry and Warwickshire	0	2.9	13.68	31		Midlands	0	1	0	0	734	207	0.4	5.056	8	0	0			14	0	0	1.17089	0	0	7.97666	0	0	0	0
Exit to Work	Cumbria and Lancashire	0	2.3	16.79	10		North	1	0	0	0	1212	984	0.1	11.59	12	0	0			8	0	0	1.22174	0	0	2.47714	0	0	0	0
Exit to Work	Derbyshire	0	2.6	13.76	28		Midlands	0	1	0	0	825	262	0.3	5.96	8	0	0			7	0	0	1.04362	0	0	12.0721	0	0	0	0
Exit to Work	Devon and Cornwall	0	1.7	16.26	13		South	0	0	0	1	684	1027	0.1	9.404	12	0	0			5	0	0	2.47554	0	0	3.83879	0	0	0	0
Exit to Work	Dorset and Somerset	0	1.3	18.5	3		South	0	0	0	1	841	610	0.1	6.932	8	0	0			6	0	0	2.75534	0	0	6.36757	0	0	0	0
Exit to Work	Essex	0	2	16.73	11		South	0	0	0	1	879	367	0.2	9.899	9	0	0			10	0	0	1.16173	0	0	3.55793	0	0	0	0
Exit to Work	Gloucestershire, Wiltshire and Swindon	0	1.5	14.93	22		South	0	0	0	1	847	614	0.1	7.24	5	0	0			7	0	0	2.09392	0	0	8.88536	0	0	0	0
Exit to Work	Hampshire and Isle of Wight	0	1.6	20.08	1		South	0	0	0	1	706	415	0.2	11.11	5	0	0			8	0	0	2.75248	0	0	4.12781	0	0	0	0
Exit to Work	Kent	0	2.2	17.24	8		South	0	0	0	1	1380	374	0.4	9.63	6	0	0			9	0	0	1.26168	0	0	5.66978	0	0	0	0
Exit to Work	Leicestershire, Rutland and Northamptonshire	0	2.5	13.85	27		Midlands	0	1	0	0	706	490	0.1	9.88	10	0	0			14	0	0	2.51518	0	0	4.81174	0	0	0	0
Exit to Work	London (Brent, Harrow and Hillingdon)	1	3.5	13.33	33		London	0	0	1	0	900	21	4.3	4.681	7	0	0			39	0	0	2.62551	0	0	7.93207	0	0	0	0
Exit to Work	London (Central)	1	3.6	11.81	39		London	0	0	1	0	1879	7	26.8	5.527	11	0	0			29	0	0	3.56432	0	0	9.81907	0	0	0	0
Exit to Work	London (City and East)	1	7.3	11.89	38		London	0	0	1	0	1179	8	14.7	4.534	13	0	0			43	0	0	2.74151	0	0	23.7583	0	0	0	0
Exit to Work	London (Lambeth, Southwark and Wandsworth)	1	4.3	12.14	37		London	0	0	1	0	1354	9	15	5.698	9	0	0			29	0	0	4.48403	0	0	14.0347	0	0	0	0
Exit to Work	London (North East)	1	3.8	13.76	29		London	0	0	1	0	834	24	3.5	5.397	8	0	0			31	0	0	3.81323	0	0	7.99333	0	0	0	0
Exit to Work	London (North)	1	4.5	12.91	35		London	0	0	1	0	1687	20	8.4	5.391	8	0	0			31	0	0	5.76145	0	0	15.4183	0	0	0	0
Exit to Work	London (South East)	1	3.8	19.61	2		London	0	0	1	0	1119	14	8	4.467	12	0	0			26	0	0	3.98702	0	0	14.1639	0	0	0	0
Exit to Work	London (South)	1	2	14	25		London	0	0	1	0	1748	41	4.3	8.583	9	0	0			23	0	0	4.71513	0	0	6.48841	0	0	0	0
Exit to Work	London (West)	1	3.3	15.85	17		London	0	0	1	0	781	13	6	4.73	6	0	0			34	0	0	3.64693	0	0	22.2896	0	0	0	0
Exit to Work	Manchester (Central)	1	4	16.2	15		North	1	0	0	0	1084	32	3.4	5.512	13	0	0			18	0	0	2.39478	0	0	9.082	0	0	0	0
Exit to Work	Manchester (East and West)	1	3.1	17.08	9		North	1	0	0	0	1458	96	1.5	10.233	12	0	0			11	0	0	3.41933	0	0	6.24059	0	0	0	0
Exit to Work	Marches	0	2	17.61	6		Midlands	0	1	0	0	1297	741	0.2	7.062	10	0	0			6	0	0	2.18918	0	0	15.6938	0	0	0	0
Exit to Work	Merseyside	1	5.5	12.37	36		North	1	0	0	0	1000	64	1.6	8.258	12	0	0			6	0	0	1.61298	0	0	4.73965	0	0	0	0
Exit to Work	Norfolk	0	2.3	12.92	34		South	0	0	0	1	1061	537	0.2	4.791	4	0	0			7	0	0	0.30683	0	0	11.2169	0	0	0	0
Exit to Work	North East Yorkshire and the Humber	0	2.8	14.55	23		North	1	0	0	0	833	1183	0.1	10.006	5	0	0			7	0	0	2.29562	0	0	2.78133	0	0	0	0
Exit to Work	Northumbria	0	3.1	15.49	20		North	1	0	0	0	1944	542	0.4	6.841	19	0	0			7	0	0	2.70136	0	0	11.0072	0	0	0	0
Exit to Work	Nottinghamshire and Lincolnshire	0	2.7	15.92	16		Midlands	0	1	0	0	2622	808	0.3	10.397	12	0	0			9	0	0	0.89353	0	0	3.2721	0	0	0	0
Exit to Work	South Tyne and Wear Valley	0	4.3	18	4		North	1	0	0	0	993	236	0.4	4.802	9	0	0			5	0	0	2.4115	0	0	13.3132	0	0	0	0
Exit to Work	South Yorkshire	1	3.5	15.43	21		North	1	0	0	0	1652	155	1.1	7.845	12	0	0			10	0	0	2.07266	0	0	14.3531	0	0	0	0
Exit to Work	Staffordshire	0	2.2	17.93	5		Midlands	0	1	0	0	656	271	0.2	6.501	4	0	0			7	0	0	1.66897	0	0	6.38517	0	0	0	0
Exit to Work	Surrey and Sussex	0	1.5	13.59	32		South	0	0	0	1	2168	544	0.4	15.376	10	0	0			10	0	0	1.09781	0	0	3.7526	0	0	0	0
Exit to Work	Tees Valley	1	4.8	14.52	24		North	1	0	0	0	1226	79	1.6	3.984	8	0	0			6	0	0	4.10392	0	0	18.6145	0	0	0	0
Exit to Work	Thames Valley (Berks, Bucks, Oxfs)	0	1.4	13.75	30		South	0	0	0	1	1052	574	0.2	13.476	9	0	0			14	0	0	2.68106	0	0	3.32072	0	0	0	0
Exit to Work	West Of England	0	1.7	17.32	7		South	0	0	0	1	1674	133	1.3	6.329	7	0	0			10	0	0	1.83441	0	0	5.71022	0	0	0	0
Exit to Work	West Yorkshire	0	3.3	16.24	14		North	1	0	0	0	2180	203	1.1	13.065	17	0	0			16	0	0	1.41906	0	0	2.33295	0	0	0	0
Face to Face Guidance Pilot	Bedfordshire and Hertfordshire	1	2	18.4	10	21	South	0	0	0	1	1221	288	0.4	10.06	10	0	0	0	0	15	0	0	1.55467	0	0	3.32505	0	0	0	0
Face to Face Guidance Pilot	Birmingham and Solihull	1	6.9	11.97	40	10	Midlands	0	1	0	0	1834	45	4.1	7.242	20	0	0	0	0	29	0	0	0.7636	0	0	6.24827	0	0	0	0
Face to Face Guidance Pilot	Black Country	0	5.4	14.93	33	46	Midlands	0	1	0	0	1636	36	4.5	6.501	14	0	0	0	0	19	0	0	5.12844	0	0	4.99923	0	0	0	0
Face to Face Guidance Pilot	Cambridgeshire and Suffolk	0	2	15.85	29	8	South	0	0	0	1	1639	719	0.2	8.607	6	0	0	0	0	11	0	0	1.31637	0	0	4.89601	0	0	0	0
Face to Face Guidance Pilot	Cheshire, Halton and Warrington	0	2.2	19.2	6	43	North	1	0	0	0	1654	234	0.7	6.067	6	0	0	0	0	4	0	0	3.57013	0	0	9.15774	0	0	0	0
Face to Face Guidance Pilot	Coventry and Warwickshire	0	2.9	14.76	34	9	Midlands	0	1	0	0	734	207	0.4	5.056	10	0	0	0	0	14	0	0	1.17089	0	0	7.97666	0	0	0	0
Face to Face Guidance Pilot	Cumbria and Lancashire	0	2.3	19.08	7		North	1	0	0	0	1212	984	0.1	11.59	13	0	0			8	0	0	1.22174	0	0	2.47714	0	0	0	0
Face to Face Guidance Pilot	Derbyshire	0	2.6	17.46	15	6	Midlands	0	1	0	0	825	262	0.3	5.96	8	0	0	0	0	7	0	0	1.04362	0	0	12.0721	0	0	0	0
Face to Face Guidance Pilot	Devon and Cornwall	0	1.7	18.49	9	20	South	0	0	0	1	684	1027	0.1	9.404	12	0	0	0	0	5	0	0	2.47554	0	0	3.83879	0	0	0	0
Face to Face Guidance Pilot	Dorset and Somerset	0	1.3	23.01	2	2	South	0	0	0	1	841	610	0.1	6.932	8	0	0	0	0	6	0	0	2.75534	0	0	6.36757	0	0	0	0
Face to Face Guidance Pilot	Essex	0	2	15.86	28	11	South	0	0	0	1	879	367	0.2	9.899	10	0	0	0	0	10	0	0	1.16173	0	0	3.55793	0	0	0	0
Face to Face Guidance Pilot	Gloucestershire, Wiltshire and Swindon	0	1.5	15.31	32	3	South	0	0	0	1	847	614	0.1	7.24	5	0	0	0	0	7	0	0	2.09392	0	0	8.88536	0	0	0	0
Face to Face Guidance Pilot	Hampshire and Isle of Wight	0	1.6	19.27	5	7	South	0	0	0	1	706	415	0.2	11.11	5	0	0	0	0	8	0	0	2.75248	0	0	4.12781	0	0	0	0
Face to Face Guidance Pilot	Kent	0	2.2	17.62	14	23	South	0	0	0	1	1380	374	0.4	9.63	6	0	0	0	0	9	0	0	1.26168	0	0	5.66978	0	0	0	0
Face to Face Guidance Pilot	Leicestershire, Rutland and Northamptonshire	0	2.5	16.17	25		Midlands	0	1	0	0	706	490	0.1	9.88	12	0	0			14	0	0	2.51518	0	0	4.81174	0	0	0	0
Face to Face Guidance Pilot	London (Brent, Harrow and Hillingdon)	0	3.5	15.54	31		London	0	0	1	0	900	21	4.3	4.681	8	0	0			39	0	0	2.62551	0	0	7.93207	0	0	0	0
Face to Face Guidance Pilot	London (Central)	0	3.6	14.31	35	13	London	0	0	1	0	1879	7	26.8	5.527	13	0	0	0	0	29	0	0	3.56432	0	0	9.81907	0	0	0	0
Face to Face Guidance Pilot	London (City and East)	0	7.3	13.02	39	17	London	0	0	1	0	1179	8	14.7	4.534	16	0	0	0	0	43	0	0	2.74151	0	0	23.7583	0	0	0	0
Face to Face Guidance Pilot	London (Lambeth, Southwark and Wandsworth)	0	4.3	13.6	37	27	London	0	0	1	0	1354	9	15	5.698	12	0	0	0	0	29	0	0	4.48403	0	0	14.0347	0	0	0	0
Face to Face Guidance Pilot	London (North East)	0	3.8	16.6	21		London	0	0	1	0	834	24	3.5	5.397	9	0	0			31	0	0	3.81323	0	0	7.99333	0	0	0	0
Face to Face Guidance Pilot	London (North)	0	4.5	16.12	26		London	0	0	1	0	1687	20	8.4	5.391	9	0	0			31	0	0	5.76145	0	0	15.4183	0	0	0	0
Face to Face Guidance Pilot	London (South East)	0	3.8	28.87	1		London	0	0	1	0	1119	14	8	4.467	14	0	0			26	0	0	3.98702	0	0	14.1639	0	0	0	0
Face to Face Guidance Pilot	London (South)	0	2	19.41	4		London	0	0	1	0	1748	41	4.3	8.583	12	0	0			23	0	0	4.71513	0	0	6.48841	0	0	0	0
Face to Face Guidance Pilot	London (West)	0	3.3	16.07	27		London	0	0	1	0	781	13	6	4.73	8	0	0			34	0	0	3.64693	0	0	22.2896	0	0	0	0
Face to Face Guidance Pilot	Manchester (Central)	0	4	16.46	22	42	North	1	0	0	0	1084	32	3.4	5.512	16	0	0	0	0	18	0	0	2.39478	0	0	9.082	0	0	0	0
Face to Face Guidance Pilot	Manchester (East and West)	0	3.1	17.73	12	37	North	1	0	0	0	1458	96	1.5	10.233	14	0	0	0	0	11	0	0	3.41933	0	0	6.24059	0	0	0	0
Face to Face Guidance Pilot	Marches	0	2	17.97	11	32	Midlands	0	1	0	0	1297	741	0.2	7.062	11	0	0	0	0	6	0	0	2.18918	0	0	15.6938	0	0	0	0
Face to Face Guidance Pilot	Merseyside	1	5.5	13.54	38		North	1	0	0	0	1000	64	1.6	8.258	14	0	0			6	0	0	1.61298	0	0	4.73965	0	0	0	0
Face to Face Guidance Pilot	Norfolk	0	2.3	17.19	18	39	South	0	0	0	1	1061	537	0.2	4.791	5	0	0	0	0	7	0	0	0.30683	0	0	11.2169	0	0	0	0
Face to Face Guidance Pilot	North East Yorkshire and the Humber	1	2.8	16.23	24	18	North	1	0	0	0	833	1183	0.1	10.006	5	0	0	0	0	7	0	0	2.29562	0	0	2.78133	0	0	0	0
Face to Face Guidance Pilot	Northumbria	0	3.1	16.24	23	28	North	1	0	0	0	1944	542	0.4	6.841	20	0	0	0	0	7	0	0	2.70136	0	0	11.0072	0	0	0	0
Face to Face Guidance Pilot	Nottinghamshire and Lincolnshire	0	2.7	17.02	19		Midlands	0	1	0	0	2622	808	0.3	10.397	13	0	0			9	0	0	0.89353	0	0	3.2721	0	0	0	0
Face to Face Guidance Pilot	South Tyne and Wear Valley	0	4.3	17.02	20	41	North	1	0	0	0	993	236	0.4	4.802	11	0	0	0	0	5	0	0	2.4115	0	0	13.3132	0	0	0	0
Face to Face Guidance Pilot	South Yorkshire	0	3.5	17.31	17	47	North	1	0	0	0	1652	155	1.1	7.845	14	0	0	0	0	10	0	0	2.07266	0	0	14.3531	0	0	0	0
Face to Face Guidance Pilot	Staffordshire	0	2.2	20.32	3	36	Midlands	0	1	0	0	656	271	0.2	6.501	5	0	0	0	0	7	0	0	1.66897	0	0	6.38517	0	0	0	0
Face to Face Guidance Pilot	Surrey and Sussex	0	1.5	15.65	30	5	South	0	0	0	1	2168	544	0.4	15.376	10	0	0	0	0	10	0	0	1.09781	0	0	3.7526	0	0	0	0
Face to Face Guidance Pilot	Tees Valley	0	4.8	13.63	36	29	North	1	0	0	0	1226	79	1.6	3.984	9	0	0	0	0	6	0	0	4.10392	0	0	18.6145	0	0	0	0
Face to Face Guidance Pilot	Thames Valley (Berks, Bucks, Oxfs)	1	1.4	17.46	16	14	South	0	0	0	1	1052	574	0.2	13.476	10	0	0	0	0	14	0	0	2.68106	0	0	3.32072	0	0	0	0
Face to Face Guidance Pilot	West Of England	0	1.7	18.84	8	1	South	0	0	0	1	1674	133	1.3	6.329	8	0	0	0	0	10	0	0	1.83441	0	0	5.71022	0	0	0	0
Face to Face Guidance Pilot	West Yorkshire	0	3.3	17.7	13	33	North	1	0	0	0	2180	203	1.1	13.065	19	0	0	0	0	16	0	0	1.41906	0	0	2.33295	0	0	0	0
Fair Cities	Bedfordshire and Hertfordshire	0	2	18.82	16		South	0	0	0	1	1221	288	0.4	10.06	7	0	0			15	1	15	1.55467	0	0	3.32505	0	0	0	0
Fair Cities	Birmingham and Solihull	1	6.9	13.14	38		Midlands	0	1	0	0	1834	45	4.1	7.242	12	0	0			29	1	29	0.7636	0	0	6.24827	0	0	0	0
Fair Cities	Black Country	0	5.4	18.12	19		Midlands	0	1	0	0	1636	36	4.5	6.501	12	0	0			19	1	19	5.12844	0	0	4.99923	0	0	0	0
Fair Cities	Cambridgeshire and Suffolk	0	2	17.56	23		South	0	0	0	1	1639	719	0.2	8.607	4	0	0			11	1	11	1.31637	0	0	4.89601	0	0	0	0
Fair Cities	Cheshire, Halton and Warrington	0	2.2	21.19	7		North	1	0	0	0	1654	234	0.7	6.067	4	0	0			4	1	4	3.57013	0	0	9.15774	0	0	0	0
Fair Cities	Coventry and Warwickshire	0	2.9	16.55	29		Midlands	0	1	0	0	734	207	0.4	5.056	7	0	0			14	1	14	1.17089	0	0	7.97666	0	0	0	0
Fair Cities	Cumbria and Lancashire	0	2.3	20.97	8		North	1	0	0	0	1212	984	0.1	11.59	10	0	0			8	1	8	1.22174	0	0	2.47714	0	0	0	0
Fair Cities	Derbyshire	0	2.6	18.06	20		Midlands	0	1	0	0	825	262	0.3	5.96	7	0	0			7	1	7	1.04362	0	0	12.0721	0	0	0	0
Fair Cities	Devon and Cornwall	0	1.7	18.68	18		South	0	0	0	1	684	1027	0.1	9.404	10	0	0			5	1	5	2.47554	0	0	3.83879	0	0	0	0
Fair Cities	Dorset and Somerset	0	1.3	20.55	10		South	0	0	0	1	841	610	0.1	6.932	7	0	0			6	1	6	2.75534	0	0	6.36757	0	0	0	0
Fair Cities	Essex	0	2	19.54	13		South	0	0	0	1	879	367	0.2	9.899	8	0	0			10	1	10	1.16173	0	0	3.55793	0	0	0	0
Fair Cities	Gloucestershire, Wiltshire and Swindon	0	1.5	17.86	21		South	0	0	0	1	847	614	0.1	7.24	3	0	0			7	1	7	2.09392	0	0	8.88536	0	0	0	0
Fair Cities	Hampshire and Isle of Wight	0	1.6	21.41	5		South	0	0	0	1	706	415	0.2	11.11	5	0	0			8	1	8	2.75248	0	0	4.12781	0	0	0	0
Fair Cities	Kent	0	2.2	19.52	14		South	0	0	0	1	1380	374	0.4	9.63	6	0	0			9	1	9	1.26168	0	0	5.66978	0	0	0	0
Fair Cities	Leicestershire, Rutland and Northamptonshire	0	2.5	14.01	36		Midlands	0	1	0	0	706	490	0.1	9.88	8	0	0			14	1	14	2.51518	0	0	4.81174	0	0	0	0
Fair Cities	London (Brent, Harrow and Hillingdon)	1	3.5	12.7	39		London	0	0	1	0	900	21	4.3	4.681	6	0	0			39	1	39	2.62551	0	0	7.93207	0	0	0	0
Fair Cities	London (Central)	0	3.6	13.51	37		London	0	0	1	0	1879	7	26.8	5.527	8	0	0			29	1	29	3.56432	0	0	9.81907	0	0	0	0
Fair Cities	London (City and East)	0	7.3	14.28	35		London	0	0	1	0	1179	8	14.7	4.534	12	0	0			43	1	43	2.74151	0	0	23.7583	0	0	0	0
Fair Cities	London (Lambeth, Southwark and Wandsworth)	0	4.3	12.49	40		London	0	0	1	0	1354	9	15	5.698	8	0	0			29	1	29	4.48403	0	0	14.0347	0	0	0	0
Fair Cities	London (North East)	0	3.8	16.61	27		London	0	0	1	0	834	24	3.5	5.397	6	0	0			31	1	31	3.81323	0	0	7.99333	0	0	0	0
Fair Cities	London (North)	0	4.5	14.65	34		London	0	0	1	0	1687	20	8.4	5.391	7	0	0			31	1	31	5.76145	0	0	15.4183	0	0	0	0
Fair Cities	London (South East)	0	3.8	21.8	4		London	0	0	1	0	1119	14	8	4.467	10	0	0			26	1	26	3.98702	0	0	14.1639	0	0	0	0
Fair Cities	London (South)	0	2	15.78	31		London	0	0	1	0	1748	41	4.3	8.583	7	0	0			23	1	23	4.71513	0	0	6.48841	0	0	0	0
Fair Cities	London (West)	0	3.3	17.32	25		London	0	0	1	0	781	13	6	4.73	5	0	0			34	1	34	3.64693	0	0	22.2896	0	0	0	0
Fair Cities	Manchester (Central)	0	4	15.86	30		North	1	0	0	0	1084	32	3.4	5.512	11	0	0			18	1	18	2.39478	0	0	9.082	0	0	0	0
Fair Cities	Manchester (East and West)	0	3.1	20.83	9		North	1	0	0	0	1458	96	1.5	10.233	9	0	0			11	1	11	3.41933	0	0	6.24059	0	0	0	0
Fair Cities	Marches	0	2	21.92	2		Midlands	0	1	0	0	1297	741	0.2	7.062	8	0	0			6	1	6	2.18918	0	0	15.6938	0	0	0	0
Fair Cities	Merseyside	0	5.5	14.75	33		North	1	0	0	0	1000	64	1.6	8.258	12	0	0			6	1	6	1.61298	0	0	4.73965	0	0	0	0
Fair Cities	Norfolk	0	2.3	17.52	24		South	0	0	0	1	1061	537	0.2	4.791	3	0	0			7	1	7	0.30683	0	0	11.2169	0	0	0	0
Fair Cities	North East Yorkshire and the Humber	0	2.8	18.95	15		North	1	0	0	0	833	1183	0.1	10.006	4	0	0			7	1	7	2.29562	0	0	2.78133	0	0	0	0
Fair Cities	Northumbria	0	3.1	17.32	26		North	1	0	0	0	1944	542	0.4	6.841	16	0	0			7	1	7	2.70136	0	0	11.0072	0	0	0	0
Fair Cities	Nottinghamshire and Lincolnshire	0	2.7	19.57	12		Midlands	0	1	0	0	2622	808	0.3	10.397	10	0	0			9	1	9	0.89353	0	0	3.2721	0	0	0	0
Fair Cities	South Tyne and Wear Valley	0	4.3	21.86	3		North	1	0	0	0	993	236	0.4	4.802	9	0	0			5	1	5	2.4115	0	0	13.3132	0	0	0	0
Fair Cities	South Yorkshire	0	3.5	18.72	17		North	1	0	0	0	1652	155	1.1	7.845	11	0	0			10	1	10	2.07266	0	0	14.3531	0	0	0	0
Fair Cities	Staffordshire	0	2.2	23.59	1		Midlands	0	1	0	0	656	271	0.2	6.501	2	0	0			7	1	7	1.66897	0	0	6.38517	0	0	0	0
Fair Cities	Surrey and Sussex	0	1.5	16.56	28		South	0	0	0	1	2168	544	0.4	15.376	7	0	0			10	1	10	1.09781	0	0	3.7526	0	0	0	0
Fair Cities	Tees Valley	0	4.8	17.64	22		North	1	0	0	0	1226	79	1.6	3.984	7	0	0			6	1	6	4.10392	0	0	18.6145	0	0	0	0
Fair Cities	Thames Valley (Berks, Bucks, Oxfs)	0	1.4	15.31	32		South	0	0	0	1	1052	574	0.2	13.476	7	0	0			14	1	14	2.68106	0	0	3.32072	0	0	0	0
Fair Cities	West Of England	0	1.7	21.28	6		South	0	0	0	1	1674	133	1.3	6.329	6	0	0			10	1	10	1.83441	0	0	5.71022	0	0	0	0
Fair Cities	West Yorkshire	1	3.3	20.29	11		North	1	0	0	0	2180	203	1.1	13.065	14	0	0			16	1	16	1.41906	0	0	2.33295	0	0	0	0
Fit For Work Service	Bedfordshire and Hertfordshire	0	2	17.01	16		South	0	0	0	1	1221	288	0.4	10.06	11	0	0			15	0	0	1.55467	0	0	3.32505	1	3.32505	0	0
Fit For Work Service	Birmingham and Solihull	1	6.9	11.56	40		Midlands	0	1	0	0	1834	45	4.1	7.242	24	0	0			29	0	0	0.7636	0	0	6.24827	1	6.24827	0	0
Fit For Work Service	Black Country	1	5.4	14.38	33		Midlands	0	1	0	0	1636	36	4.5	6.501	16	0	0			19	0	0	5.12844	0	0	4.99923	1	4.99923	0	0
Fit For Work Service	Cambridgeshire and Suffolk	0	2	15.54	25		South	0	0	0	1	1639	719	0.2	8.607	8	0	0			11	0	0	1.31637	0	0	4.89601	1	4.89601	0	0
Fit For Work Service	Cheshire, Halton and Warrington	0	2.2	17.24	12		North	1	0	0	0	1654	234	0.7	6.067	8	0	0			4	0	0	3.57013	0	0	9.15774	1	9.15774	0	0
Fit For Work Service	Coventry and Warwickshire	1	2.9	17.18	13		Midlands	0	1	0	0	734	207	0.4	5.056	12	0	0			14	0	0	1.17089	0	0	7.97666	1	7.97666	0	0
Fit For Work Service	Cumbria and Lancashire	0	2.3	19.86	3		North	1	0	0	0	1212	984	0.1	11.59	14	0	0			8	0	0	1.22174	0	0	2.47714	1	2.47714	0	0
Fit For Work Service	Derbyshire	0	2.6	16.8	17		Midlands	0	1	0	0	825	262	0.3	5.96	8	0	0			7	0	0	1.04362	0	0	12.0721	1	12.0721	0	0
Fit For Work Service	Devon and Cornwall	0	1.7	16.59	21		South	0	0	0	1	684	1027	0.1	9.404	12	0	0			5	0	0	2.47554	0	0	3.83879	1	3.83879	0	0
Fit For Work Service	Dorset and Somerset	0	1.3	21.04	2		South	0	0	0	1	841	610	0.1	6.932	9	0	0			6	0	0	2.75534	0	0	6.36757	1	6.36757	0	0
Fit For Work Service	Essex	0	2	16.68	20		South	0	0	0	1	879	367	0.2	9.899	10	0	0			10	0	0	1.16173	0	0	3.55793	1	3.55793	0	0
Fit For Work Service	Gloucestershire, Wiltshire and Swindon	0	1.5	15.11	28		South	0	0	0	1	847	614	0.1	7.24	6	0	0			7	0	0	2.09392	0	0	8.88536	1	8.88536	0	0
Fit For Work Service	Hampshire and Isle of Wight	0	1.6	17.03	15		South	0	0	0	1	706	415	0.2	11.11	6	0	0			8	0	0	2.75248	0	0	4.12781	1	4.12781	0	0
Fit For Work Service	Kent	1	2.2	15.81	24		South	0	0	0	1	1380	374	0.4	9.63	7	0	0			9	0	0	1.26168	0	0	5.66978	1	5.66978	0	0
Fit For Work Service	Leicestershire, Rutland and Northamptonshire	1	2.5	15.24	27		Midlands	0	1	0	0	706	490	0.1	9.88	12	0	0			14	0	0	2.51518	0	0	4.81174	1	4.81174	0	0
Fit For Work Service	London (Brent, Harrow and Hillingdon)	0	3.5	16.39	22		London	0	0	1	0	900	21	4.3	4.681	8	0	0			39	0	0	2.62551	0	0	7.93207	1	7.93207	0	0
Fit For Work Service	London (Central)	1	3.6	14.97	30		London	0	0	1	0	1879	7	26.8	5.527	17	0	0			29	0	0	3.56432	0	0	9.81907	1	9.81907	0	0
Fit For Work Service	London (City and East)	0	7.3	13.89	37		London	0	0	1	0	1179	8	14.7	4.534	17	0	0			43	0	0	2.74151	0	0	23.7583	1	23.7583	0	0
Fit For Work Service	London (Lambeth, Southwark and Wandsworth)	0	4.3	13.29	38		London	0	0	1	0	1354	9	15	5.698	16	0	0			29	0	0	4.48403	0	0	14.0347	1	14.0347	0	0
Fit For Work Service	London (North East)	0	3.8	17.82	10		London	0	0	1	0	834	24	3.5	5.397	11	0	0			31	0	0	3.81323	0	0	7.99333	1	7.99333	0	0
Fit For Work Service	London (North)	0	4.5	15.88	23		London	0	0	1	0	1687	20	8.4	5.391	11	0	0			31	0	0	5.76145	0	0	15.4183	1	15.4183	0	0
Fit For Work Service	London (South East)	0	3.8	27.37	1		London	0	0	1	0	1119	14	8	4.467	15	0	0			26	0	0	3.98702	0	0	14.1639	1	14.1639	0	0
Fit For Work Service	London (South)	0	2	19.1	5		London	0	0	1	0	1748	41	4.3	8.583	12	0	0			23	0	0	4.71513	0	0	6.48841	1	6.48841	0	0
Fit For Work Service	London (West)	0	3.3	18.24	7		London	0	0	1	0	781	13	6	4.73	11	0	0			34	0	0	3.64693	0	0	22.2896	1	22.2896	0	0
Fit For Work Service	Manchester (Central)	1	4	17.07	14		North	1	0	0	0	1084	32	3.4	5.512	19	0	0			18	0	0	2.39478	0	0	9.082	1	9.082	0	0
Fit For Work Service	Manchester (East and West)	1	3.1	14.72	31		North	1	0	0	0	1458	96	1.5	10.233	16	0	0			11	0	0	3.41933	0	0	6.24059	1	6.24059	0	0
Fit For Work Service	Marches	0	2	18.52	6		Midlands	0	1	0	0	1297	741	0.2	7.062	14	0	0			6	0	0	2.18918	0	0	15.6938	1	15.6938	0	0
Fit For Work Service	Merseyside	0	5.5	14.18	35		North	1	0	0	0	1000	64	1.6	8.258	16	0	0			6	0	0	1.61298	0	0	4.73965	1	4.73965	0	0
Fit For Work Service	Norfolk	0	2.3	15.06	29		South	0	0	0	1	1061	537	0.2	4.791	6	0	0			7	0	0	0.30683	0	0	11.2169	1	11.2169	0	0
Fit For Work Service	North East Yorkshire and the Humber	0	2.8	15.35	26		North	1	0	0	0	833	1183	0.1	10.006	10	0	0			7	0	0	2.29562	0	0	2.78133	1	2.78133	0	0
Fit For Work Service	Northumbria	0	3.1	19.26	4		North	1	0	0	0	1944	542	0.4	6.841	21	0	0			7	0	0	2.70136	0	0	11.0072	1	11.0072	0	0
Fit For Work Service	Nottinghamshire and Lincolnshire	1	2.7	14.54	32		Midlands	0	1	0	0	2622	808	0.3	10.397	16	0	0			9	0	0	0.89353	0	0	3.2721	1	3.2721	0	0
Fit For Work Service	South Tyne and Wear Valley	0	4.3	17.86	8		North	1	0	0	0	993	236	0.4	4.802	12	0	0			5	0	0	2.4115	0	0	13.3132	1	13.3132	0	0
Fit For Work Service	South Yorkshire	0	3.5	14.16	36		North	1	0	0	0	1652	155	1.1	7.845	15	0	0			10	0	0	2.07266	0	0	14.3531	1	14.3531	0	0
Fit For Work Service	Staffordshire	1	2.2	17.86	9		Midlands	0	1	0	0	656	271	0.2	6.501	6	0	0			7	0	0	1.66897	0	0	6.38517	1	6.38517	0	0
Fit For Work Service	Surrey and Sussex	0	1.5	14.31	34		South	0	0	0	1	2168	544	0.4	15.376	10	0	0			10	0	0	1.09781	0	0	3.7526	1	3.7526	0	0
Fit For Work Service	Tees Valley	0	4.8	12.47	39		North	1	0	0	0	1226	79	1.6	3.984	11	0	0			6	0	0	4.10392	0	0	18.6145	1	18.6145	0	0
Fit For Work Service	Thames Valley (Berks, Bucks, Oxfs)	0	1.4	16.8	18		South	0	0	0	1	1052	574	0.2	13.476	12	0	0			14	0	0	2.68106	0	0	3.32072	1	3.32072	0	0
Fit For Work Service	West Of England	0	1.7	16.75	19		South	0	0	0	1	1674	133	1.3	6.329	8	0	0			10	0	0	1.83441	0	0	5.71022	1	5.71022	0	0
Fit For Work Service	West Yorkshire	1	3.3	17.31	11		North	1	0	0	0	2180	203	1.1	13.065	20	0	0			16	0	0	1.41906	0	0	2.33295	1	2.33295	0	0
Integrated Employment and Skills	Bedfordshire and Hertfordshire	0	2	18.4	10	21	South	0	0	0	1	1221	288	0.4	10.06	11	0	1	0	21	15	0	0	1.55467	0	0	3.32505	0	0	0	10
Integrated Employment and Skills	Birmingham and Solihull	1	6.9	11.97	40	10	Midlands	0	1	0	0	1834	45	4.1	7.242	22	0	1	0	10	29	0	0	0.7636	0	0	6.24827	0	0	0	40
Integrated Employment and Skills	Black Country	1	5.4	14.93	33	46	Midlands	0	1	0	0	1636	36	4.5	6.501	14	0	1	0	46	19	0	0	5.12844	0	0	4.99923	0	0	0	33
Integrated Employment and Skills	Cambridgeshire and Suffolk	1	2	15.85	29	8	South	0	0	0	1	1639	719	0.2	8.607	6	0	1	0	8	11	0	0	1.31637	0	0	4.89601	0	0	0	29
Integrated Employment and Skills	Cheshire, Halton and Warrington	0	2.2	19.2	6	43	North	1	0	0	0	1654	234	0.7	6.067	6	0	1	0	43	4	0	0	3.57013	0	0	9.15774	0	0	0	6
Integrated Employment and Skills	Coventry and Warwickshire	1	2.9	14.76	34	9	Midlands	0	1	0	0	734	207	0.4	5.056	10	0	1	0	9	14	0	0	1.17089	0	0	7.97666	0	0	0	34
Integrated Employment and Skills	Cumbria and Lancashire	0	2.3	19.08	7		North	1	0	0	0	1212	984	0.1	11.59	13	0	1			8	0	0	1.22174	0	0	2.47714	0	0	0	7
Integrated Employment and Skills	Derbyshire	0	2.6	17.46	15	6	Midlands	0	1	0	0	825	262	0.3	5.96	8	0	1	0	6	7	0	0	1.04362	0	0	12.0721	0	0	0	15
Integrated Employment and Skills	Devon and Cornwall	0	1.7	18.49	9	20	South	0	0	0	1	684	1027	0.1	9.404	12	0	1	0	20	5	0	0	2.47554	0	0	3.83879	0	0	0	9
Integrated Employment and Skills	Dorset and Somerset	0	1.3	23.01	2	2	South	0	0	0	1	841	610	0.1	6.932	8	0	1	0	2	6	0	0	2.75534	0	0	6.36757	0	0	0	2
Integrated Employment and Skills	Essex	0	2	15.86	28	11	South	0	0	0	1	879	367	0.2	9.899	10	0	1	0	11	10	0	0	1.16173	0	0	3.55793	0	0	0	28
Integrated Employment and Skills	Gloucestershire, Wiltshire and Swindon	0	1.5	15.31	32	3	South	0	0	0	1	847	614	0.1	7.24	5	0	1	0	3	7	0	0	2.09392	0	0	8.88536	0	0	0	32
Integrated Employment and Skills	Hampshire and Isle of Wight	0	1.6	19.27	5	7	South	0	0	0	1	706	415	0.2	11.11	5	0	1	0	7	8	0	0	2.75248	0	0	4.12781	0	0	0	5
Integrated Employment and Skills	Kent	0	2.2	17.62	14	23	South	0	0	0	1	1380	374	0.4	9.63	6	0	1	0	23	9	0	0	1.26168	0	0	5.66978	0	0	0	14
Integrated Employment and Skills	Leicestershire, Rutland and Northamptonshire	0	2.5	16.17	25		Midlands	0	1	0	0	706	490	0.1	9.88	12	0	1			14	0	0	2.51518	0	0	4.81174	0	0	0	25
Integrated Employment and Skills	London (Brent, Harrow and Hillingdon)	0	3.5	15.54	31		London	0	0	1	0	900	21	4.3	4.681	8	0	1			39	0	0	2.62551	0	0	7.93207	0	0	0	31
Integrated Employment and Skills	London (Central)	1	3.6	14.31	35	13	London	0	0	1	0	1879	7	26.8	5.527	13	0	1	0	13	29	0	0	3.56432	0	0	9.81907	0	0	0	35
Integrated Employment and Skills	London (City and East)	0	7.3	13.02	39	17	London	0	0	1	0	1179	8	14.7	4.534	16	0	1	0	17	43	0	0	2.74151	0	0	23.7583	0	0	0	39
Integrated Employment and Skills	London (Lambeth, Southwark and Wandsworth)	1	4.3	13.6	37	27	London	0	0	1	0	1354	9	15	5.698	13	0	1	0	27	29	0	0	4.48403	0	0	14.0347	0	0	0	37
Integrated Employment and Skills	London (North East)	0	3.8	16.6	21		London	0	0	1	0	834	24	3.5	5.397	10	0	1			31	0	0	3.81323	0	0	7.99333	0	0	0	21
Integrated Employment and Skills	London (North)	0	4.5	16.12	26		London	0	0	1	0	1687	20	8.4	5.391	10	0	1			31	0	0	5.76145	0	0	15.4183	0	0	0	26
Integrated Employment and Skills	London (South East)	0	3.8	28.87	1		London	0	0	1	0	1119	14	8	4.467	14	0	1			26	0	0	3.98702	0	0	14.1639	0	0	0	1
Integrated Employment and Skills	London (South)	0	2	19.41	4		London	0	0	1	0	1748	41	4.3	8.583	12	0	1			23	0	0	4.71513	0	0	6.48841	0	0	0	4
Integrated Employment and Skills	London (West)	0	3.3	16.07	27		London	0	0	1	0	781	13	6	4.73	8	0	1			34	0	0	3.64693	0	0	22.2896	0	0	0	27
Integrated Employment and Skills	Manchester (Central)	1	4	16.46	22	42	North	1	0	0	0	1084	32	3.4	5.512	17	0	1	0	42	18	0	0	2.39478	0	0	9.082	0	0	0	22
Integrated Employment and Skills	Manchester (East and West)	1	3.1	17.73	12	37	North	1	0	0	0	1458	96	1.5	10.233	15	0	1	0	37	11	0	0	3.41933	0	0	6.24059	0	0	0	12
Integrated Employment and Skills	Marches	1	2	17.97	11	32	Midlands	0	1	0	0	1297	741	0.2	7.062	12	0	1	0	32	6	0	0	2.18918	0	0	15.6938	0	0	0	11
Integrated Employment and Skills	Merseyside	0	5.5	13.54	38		North	1	0	0	0	1000	64	1.6	8.258	15	0	1			6	0	0	1.61298	0	0	4.73965	0	0	0	38
Integrated Employment and Skills	Norfolk	1	2.3	17.19	18	39	South	0	0	0	1	1061	537	0.2	4.791	5	0	1	0	39	7	0	0	0.30683	0	0	11.2169	0	0	0	18
Integrated Employment and Skills	North East Yorkshire and the Humber	0	2.8	16.23	24	18	North	1	0	0	0	833	1183	0.1	10.006	6	0	1	0	18	7	0	0	2.29562	0	0	2.78133	0	0	0	24
Integrated Employment and Skills	Northumbria	0	3.1	16.24	23	28	North	1	0	0	0	1944	542	0.4	6.841	20	0	1	0	28	7	0	0	2.70136	0	0	11.0072	0	0	0	23
Integrated Employment and Skills	Nottinghamshire and Lincolnshire	0	2.7	17.02	19		Midlands	0	1	0	0	2622	808	0.3	10.397	13	0	1			9	0	0	0.89353	0	0	3.2721	0	0	0	19
Integrated Employment and Skills	South Tyne and Wear Valley	0	4.3	17.02	20	41	North	1	0	0	0	993	236	0.4	4.802	11	0	1	0	41	5	0	0	2.4115	0	0	13.3132	0	0	0	20
Integrated Employment and Skills	South Yorkshire	0	3.5	17.31	17	47	North	1	0	0	0	1652	155	1.1	7.845	14	0	1	0	47	10	0	0	2.07266	0	0	14.3531	0	0	0	17
Integrated Employment and Skills	Staffordshire	1	2.2	20.32	3	36	Midlands	0	1	0	0	656	271	0.2	6.501	5	0	1	0	36	7	0	0	1.66897	0	0	6.38517	0	0	0	3
Integrated Employment and Skills	Surrey and Sussex	0	1.5	15.65	30	5	South	0	0	0	1	2168	544	0.4	15.376	10	0	1	0	5	10	0	0	1.09781	0	0	3.7526	0	0	0	30
Integrated Employment and Skills	Tees Valley	0	4.8	13.63	36	29	North	1	0	0	0	1226	79	1.6	3.984	9	0	1	0	29	6	0	0	4.10392	0	0	18.6145	0	0	0	36
Integrated Employment and Skills	Thames Valley (Berks, Bucks, Oxfs)	0	1.4	17.46	16	14	South	0	0	0	1	1052	574	0.2	13.476	11	0	1	0	14	14	0	0	2.68106	0	0	3.32072	0	0	0	16
Integrated Employment and Skills	West Of England	0	1.7	18.84	8	1	South	0	0	0	1	1674	133	1.3	6.329	8	0	1	0	1	10	0	0	1.83441	0	0	5.71022	0	0	0	8
Integrated Employment and Skills	West Yorkshire	0	3.3	17.7	13	33	North	1	0	0	0	2180	203	1.1	13.065	19	0	1	0	33	16	0	0	1.41906	0	0	2.33295	0	0	0	13
Integrated Services Prototype	Bedfordshire and Hertfordshire	0	2	18.12	7		South	0	0	0	1	1221	288	0.4	10.06	1	0	0			15	0	0	1.55467	0	0	3.32505	0	0	0	0
Integrated Services Prototype	Birmingham and Solihull	0	6.9	11.33	39		Midlands	0	1	0	0	1834	45	4.1	7.242	0	0	0			29	0	0	0.7636	0	0	6.24827	0	0	0	0
Integrated Services Prototype	Black Country	0	5.4	15.3	22		Midlands	0	1	0	0	1636	36	4.5	6.501	1	0	0			19	0	0	5.12844	0	0	4.99923	0	0	0	0
Integrated Services Prototype	Cambridgeshire and Suffolk	0	2	17.45	13		South	0	0	0	1	1639	719	0.2	8.607	1	0	0			11	0	0	1.31637	0	0	4.89601	0	0	0	0
Integrated Services Prototype	Cheshire, Halton and Warrington	0	2.2	17.91	9		North	1	0	0	0	1654	234	0.7	6.067	1	0	0			4	0	0	3.57013	0	0	9.15774	0	0	0	0
Integrated Services Prototype	Coventry and Warwickshire	0	2.9	14.18	29		Midlands	0	1	0	0	734	207	0.4	5.056	1	0	0			14	0	0	1.17089	0	0	7.97666	0	0	0	0
Integrated Services Prototype	Cumbria and Lancashire	0	2.3	17.8	11		North	1	0	0	0	1212	984	0.1	11.59	1	0	0			8	0	0	1.22174	0	0	2.47714	0	0	0	0
Integrated Services Prototype	Derbyshire	0	2.6	18.54	4		Midlands	0	1	0	0	825	262	0.3	5.96	1	0	0			7	0	0	1.04362	0	0	12.0721	0	0	0	0
Integrated Services Prototype	Devon and Cornwall	0	1.7	14.06	30		South	0	0	0	1	684	1027	0.1	9.404	2	0	0			5	0	0	2.47554	0	0	3.83879	0	0	0	0
Integrated Services Prototype	Dorset and Somerset	0	1.3	15.88	20		South	0	0	0	1	841	610	0.1	6.932	0	0	0			6	0	0	2.75534	0	0	6.36757	0	0	0	0
Integrated Services Prototype	Essex	0	2	15.78	21		South	0	0	0	1	879	367	0.2	9.899	0	0	0			10	0	0	1.16173	0	0	3.55793	0	0	0	0
Integrated Services Prototype	Gloucestershire, Wiltshire and Swindon	0	1.5	17	16		South	0	0	0	1	847	614	0.1	7.24	0	0	0			7	0	0	2.09392	0	0	8.88536	0	0	0	0
Integrated Services Prototype	Hampshire and Isle of Wight	0	1.6	16.44	18		South	0	0	0	1	706	415	0.2	11.11	0	0	0			8	0	0	2.75248	0	0	4.12781	0	0	0	0
Integrated Services Prototype	Kent	0	2.2	16.25	19		South	0	0	0	1	1380	374	0.4	9.63	0	0	0			9	0	0	1.26168	0	0	5.66978	0	0	0	0
Integrated Services Prototype	Leicestershire, Rutland and Northamptonshire	0	2.5	18.37	6		Midlands	0	1	0	0	706	490	0.1	9.88	0	0	0			14	0	0	2.51518	0	0	4.81174	0	0	0	0
Integrated Services Prototype	London (Brent, Harrow and Hillingdon)	0	3.5	13.85	32		London	0	0	1	0	900	21	4.3	4.681	0	0	0			39	0	0	2.62551	0	0	7.93207	0	0	0	0
Integrated Services Prototype	London (Central)	0	3.6	11.74	37		London	0	0	1	0	1879	7	26.8	5.527	0	0	0			29	0	0	3.56432	0	0	9.81907	0	0	0	0
Integrated Services Prototype	London (City and East)	0	7.3	14.84	26		London	0	0	1	0	1179	8	14.7	4.534	0	0	0			43	0	0	2.74151	0	0	23.7583	0	0	0	0
Integrated Services Prototype	London (Lambeth, Southwark and Wandsworth)	0	4.3	13.26	33		London	0	0	1	0	1354	9	15	5.698	1	0	0			29	0	0	4.48403	0	0	14.0347	0	0	0	0
Integrated Services Prototype	London (North East)	0	3.8	17.96	8		London	0	0	1	0	834	24	3.5	5.397	0	0	0			31	0	0	3.81323	0	0	7.99333	0	0	0	0
Integrated Services Prototype	London (North)	0	4.5	12.54	35		London	0	0	1	0	1687	20	8.4	5.391	0	0	0			31	0	0	5.76145	0	0	15.4183	0	0	0	0
Integrated Services Prototype	London (South East)	1	3.8	17.13	14		London	0	0	1	0	1119	14	8	4.467	0	0	0			26	0	0	3.98702	0	0	14.1639	0	0	0	0
Integrated Services Prototype	London (South)	0	2	13.89	31		London	0	0	1	0	1748	41	4.3	8.583	0	0	0			23	0	0	4.71513	0	0	6.48841	0	0	0	0
Integrated Services Prototype	London (West)	0	3.3	14.87	25		London	0	0	1	0	781	13	6	4.73	0	0	0			34	0	0	3.64693	0	0	22.2896	0	0	0	0
Integrated Services Prototype	Manchester (Central)	0	4	14.42	28		North	1	0	0	0	1084	32	3.4	5.512	0	0	0			18	0	0	2.39478	0	0	9.082	0	0	0	0
Integrated Services Prototype	Manchester (East and West)	0	3.1	20.9	2		North	1	0	0	0	1458	96	1.5	10.233	0	0	0			11	0	0	3.41933	0	0	6.24059	0	0	0	0
Integrated Services Prototype	Marches	0	2	17.07	15		Midlands	0	1	0	0	1297	741	0.2	7.062	1	0	0			6	0	0	2.18918	0	0	15.6938	0	0	0	0
Integrated Services Prototype	Merseyside	0	5.5	12.27	36		North	1	0	0	0	1000	64	1.6	8.258	2	0	0			6	0	0	1.61298	0	0	4.73965	0	0	0	0
Integrated Services Prototype	Norfolk	0	2.3	14.9	24		South	0	0	0	1	1061	537	0.2	4.791	0	0	0			7	0	0	0.30683	0	0	11.2169	0	0	0	0
Integrated Services Prototype	North East Yorkshire and the Humber	0	2.8	14.58	27		North	1	0	0	0	833	1183	0.1	10.006	0	0	0			7	0	0	2.29562	0	0	2.78133	0	0	0	0
Integrated Services Prototype	Northumbria	0	3.1	10.95	40		North	1	0	0	0	1944	542	0.4	6.841	1	0	0			7	0	0	2.70136	0	0	11.0072	0	0	0	0
Integrated Services Prototype	Nottinghamshire and Lincolnshire	0	2.7	17.91	10		Midlands	0	1	0	0	2622	808	0.3	10.397	0	0	0			9	0	0	0.89353	0	0	3.2721	0	0	0	0
Integrated Services Prototype	South Tyne and Wear Valley	0	4.3	19.01	3		North	1	0	0	0	993	236	0.4	4.802	0	0	0			5	0	0	2.4115	0	0	13.3132	0	0	0	0
Integrated Services Prototype	South Yorkshire	0	3.5	12.56	34		North	1	0	0	0	1652	155	1.1	7.845	2	0	0			10	0	0	2.07266	0	0	14.3531	0	0	0	0
Integrated Services Prototype	Staffordshire	0	2.2	17.69	12		Midlands	0	1	0	0	656	271	0.2	6.501	0	0	0			7	0	0	1.66897	0	0	6.38517	0	0	0	0
Integrated Services Prototype	Surrey and Sussex	0	1.5	16.99	17		South	0	0	0	1	2168	544	0.4	15.376	2	0	0			10	0	0	1.09781	0	0	3.7526	0	0	0	0
Integrated Services Prototype	Tees Valley	0	4.8	11.38	38		North	1	0	0	0	1226	79	1.6	3.984	1	0	0			6	0	0	4.10392	0	0	18.6145	0	0	0	0
Integrated Services Prototype	Thames Valley (Berks, Bucks, Oxfs)	0	1.4	18.49	5		South	0	0	0	1	1052	574	0.2	13.476	0	0	0			14	0	0	2.68106	0	0	3.32072	0	0	0	0
Integrated Services Prototype	West Of England	0	1.7	23.5	1		South	0	0	0	1	1674	133	1.3	6.329	0	0	0			10	0	0	1.83441	0	0	5.71022	0	0	0	0
Integrated Services Prototype	West Yorkshire	0	3.3	15.01	23		North	1	0	0	0	2180	203	1.1	13.065	0	0	0			16	0	0	1.41906	0	0	2.33295	0	0	0	0
In-Work Retention Pilot	Bedfordshire and Hertfordshire	0	2	18.4	10	21	South	0	0	0	1	1221	288	0.4	10.06	11	0	1	0	21	15	0	0	1.55467	1	1.55467	3.32505	0	0	0	10
In-Work Retention Pilot	Birmingham and Solihull	0	6.9	11.97	40	10	Midlands	0	1	0	0	1834	45	4.1	7.242	22	0	1	0	10	29	0	0	0.7636	1	0.7636	6.24827	0	0	0	40
In-Work Retention Pilot	Black Country	0	5.4	14.93	33	46	Midlands	0	1	0	0	1636	36	4.5	6.501	14	0	1	0	46	19	0	0	5.12844	1	5.12844	4.99923	0	0	0	33
In-Work Retention Pilot	Cambridgeshire and Suffolk	0	2	15.85	29	8	South	0	0	0	1	1639	719	0.2	8.607	6	0	1	0	8	11	0	0	1.31637	1	1.31637	4.89601	0	0	0	29
In-Work Retention Pilot	Cheshire, Halton and Warrington	0	2.2	19.2	6	43	North	1	0	0	0	1654	234	0.7	6.067	6	0	1	0	43	4	0	0	3.57013	1	3.57013	9.15774	0	0	0	6
In-Work Retention Pilot	Coventry and Warwickshire	0	2.9	14.76	34	9	Midlands	0	1	0	0	734	207	0.4	5.056	10	0	1	0	9	14	0	0	1.17089	1	1.17089	7.97666	0	0	0	34
In-Work Retention Pilot	Cumbria and Lancashire	0	2.3	19.08	7		North	1	0	0	0	1212	984	0.1	11.59	13	0	1			8	0	0	1.22174	1	1.22174	2.47714	0	0	0	7
In-Work Retention Pilot	Derbyshire	0	2.6	17.46	15	6	Midlands	0	1	0	0	825	262	0.3	5.96	8	0	1	0	6	7	0	0	1.04362	1	1.04362	12.0721	0	0	0	15
In-Work Retention Pilot	Devon and Cornwall	0	1.7	18.49	9	20	South	0	0	0	1	684	1027	0.1	9.404	12	0	1	0	20	5	0	0	2.47554	1	2.47554	3.83879	0	0	0	9
In-Work Retention Pilot	Dorset and Somerset	0	1.3	23.01	2	2	South	0	0	0	1	841	610	0.1	6.932	8	0	1	0	2	6	0	0	2.75534	1	2.75534	6.36757	0	0	0	2
In-Work Retention Pilot	Essex	0	2	15.86	28	11	South	0	0	0	1	879	367	0.2	9.899	10	0	1	0	11	10	0	0	1.16173	1	1.16173	3.55793	0	0	0	28
In-Work Retention Pilot	Gloucestershire, Wiltshire and Swindon	0	1.5	15.31	32	3	South	0	0	0	1	847	614	0.1	7.24	5	0	1	0	3	7	0	0	2.09392	1	2.09392	8.88536	0	0	0	32
In-Work Retention Pilot	Hampshire and Isle of Wight	0	1.6	19.27	5	7	South	0	0	0	1	706	415	0.2	11.11	5	0	1	0	7	8	0	0	2.75248	1	2.75248	4.12781	0	0	0	5
In-Work Retention Pilot	Kent	0	2.2	17.62	14	23	South	0	0	0	1	1380	374	0.4	9.63	6	0	1	0	23	9	0	0	1.26168	1	1.26168	5.66978	0	0	0	14
In-Work Retention Pilot	Leicestershire, Rutland and Northamptonshire	0	2.5	16.17	25		Midlands	0	1	0	0	706	490	0.1	9.88	12	0	1			14	0	0	2.51518	1	2.51518	4.81174	0	0	0	25
In-Work Retention Pilot	London (Brent, Harrow and Hillingdon)	0	3.5	15.54	31		London	0	0	1	0	900	21	4.3	4.681	8	0	1			39	0	0	2.62551	1	2.62551	7.93207	0	0	0	31
In-Work Retention Pilot	London (Central)	0	3.6	14.31	35	13	London	0	0	1	0	1879	7	26.8	5.527	13	0	1	0	13	29	0	0	3.56432	1	3.56432	9.81907	0	0	0	35
In-Work Retention Pilot	London (City and East)	0	7.3	13.02	39	17	London	0	0	1	0	1179	8	14.7	4.534	16	0	1	0	17	43	0	0	2.74151	1	2.74151	23.7583	0	0	0	39
In-Work Retention Pilot	London (Lambeth, Southwark and Wandsworth)	0	4.3	13.6	37	27	London	0	0	1	0	1354	9	15	5.698	13	0	1	0	27	29	0	0	4.48403	1	4.48403	14.0347	0	0	0	37
In-Work Retention Pilot	London (North East)	0	3.8	16.6	21		London	0	0	1	0	834	24	3.5	5.397	10	0	1			31	0	0	3.81323	1	3.81323	7.99333	0	0	0	21
In-Work Retention Pilot	London (North)	0	4.5	16.12	26		London	0	0	1	0	1687	20	8.4	5.391	10	0	1			31	0	0	5.76145	1	5.76145	15.4183	0	0	0	26
In-Work Retention Pilot	London (South East)	0	3.8	28.87	1		London	0	0	1	0	1119	14	8	4.467	14	0	1			26	0	0	3.98702	1	3.98702	14.1639	0	0	0	1
In-Work Retention Pilot	London (South)	0	2	19.41	4		London	0	0	1	0	1748	41	4.3	8.583	12	0	1			23	0	0	4.71513	1	4.71513	6.48841	0	0	0	4
In-Work Retention Pilot	London (West)	0	3.3	16.07	27		London	0	0	1	0	781	13	6	4.73	8	0	1			34	0	0	3.64693	1	3.64693	22.2896	0	0	0	27
In-Work Retention Pilot	Manchester (Central)	1	4	16.46	22	42	North	1	0	0	0	1084	32	3.4	5.512	16	0	1	0	42	18	0	0	2.39478	1	2.39478	9.082	0	0	0	22
In-Work Retention Pilot	Manchester (East and West)	1	3.1	17.73	12	37	North	1	0	0	0	1458	96	1.5	10.233	14	0	1	0	37	11	0	0	3.41933	1	3.41933	6.24059	0	0	0	12
In-Work Retention Pilot	Marches	0	2	17.97	11	32	Midlands	0	1	0	0	1297	741	0.2	7.062	12	0	1	0	32	6	0	0	2.18918	1	2.18918	15.6938	0	0	0	11
In-Work Retention Pilot	Merseyside	0	5.5	13.54	38		North	1	0	0	0	1000	64	1.6	8.258	15	0	1			6	0	0	1.61298	1	1.61298	4.73965	0	0	0	38
In-Work Retention Pilot	Norfolk	0	2.3	17.19	18	39	South	0	0	0	1	1061	537	0.2	4.791	5	0	1	0	39	7	0	0	0.30683	1	0.30683	11.2169	0	0	0	18
In-Work Retention Pilot	North East Yorkshire and the Humber	0	2.8	16.23	24	18	North	1	0	0	0	833	1183	0.1	10.006	6	0	1	0	18	7	0	0	2.29562	1	2.29562	2.78133	0	0	0	24
In-Work Retention Pilot	Northumbria	0	3.1	16.24	23	28	North	1	0	0	0	1944	542	0.4	6.841	20	0	1	0	28	7	0	0	2.70136	1	2.70136	11.0072	0	0	0	23
In-Work Retention Pilot	Nottinghamshire and Lincolnshire	0	2.7	17.02	19		Midlands	0	1	0	0	2622	808	0.3	10.397	13	0	1			9	0	0	0.89353	1	0.89353	3.2721	0	0	0	19
In-Work Retention Pilot	South Tyne and Wear Valley	0	4.3	17.02	20	41	North	1	0	0	0	993	236	0.4	4.802	11	0	1	0	41	5	0	0	2.4115	1	2.4115	13.3132	0	0	0	20
In-Work Retention Pilot	South Yorkshire	0	3.5	17.31	17	47	North	1	0	0	0	1652	155	1.1	7.845	14	0	1	0	47	10	0	0	2.07266	1	2.07266	14.3531	0	0	0	17
In-Work Retention Pilot	Staffordshire	0	2.2	20.32	3	36	Midlands	0	1	0	0	656	271	0.2	6.501	5	0	1	0	36	7	0	0	1.66897	1	1.66897	6.38517	0	0	0	3
In-Work Retention Pilot	Surrey and Sussex	0	1.5	15.65	30	5	South	0	0	0	1	2168	544	0.4	15.376	10	0	1	0	5	10	0	0	1.09781	1	1.09781	3.7526	0	0	0	30
In-Work Retention Pilot	Tees Valley	0	4.8	13.63	36	29	North	1	0	0	0	1226	79	1.6	3.984	9	0	1	0	29	6	0	0	4.10392	1	4.10392	18.6145	0	0	0	36
In-Work Retention Pilot	Thames Valley (Berks, Bucks, Oxfs)	0	1.4	17.46	16	14	South	0	0	0	1	1052	574	0.2	13.476	11	0	1	0	14	14	0	0	2.68106	1	2.68106	3.32072	0	0	0	16
In-Work Retention Pilot	West Of England	0	1.7	18.84	8	1	South	0	0	0	1	1674	133	1.3	6.329	8	0	1	0	1	10	0	0	1.83441	1	1.83441	5.71022	0	0	0	8
In-Work Retention Pilot	West Yorkshire	0	3.3	17.7	13	33	North	1	0	0	0	2180	203	1.1	13.065	19	0	1	0	33	16	0	0	1.41906	1	1.41906	2.33295	0	0	0	13
Job Retention and Rehabilitation Pilot	Bedfordshire and Hertfordshire	0	2	18.56	12		South	0	0	0	1	1221	288	0.4	10.06	5	0	0			15	0	0	1.55467	0	0	3.32505	1	3.32505	0	0
Job Retention and Rehabilitation Pilot	Birmingham and Solihull	1	6.9	13.11	39		Midlands	0	1	0	0	1834	45	4.1	7.242	8	0	0			29	0	0	0.7636	0	0	6.24827	1	6.24827	0	0
Job Retention and Rehabilitation Pilot	Black Country	0	5.4	16.57	26		Midlands	0	1	0	0	1636	36	4.5	6.501	8	0	0			19	0	0	5.12844	0	0	4.99923	1	4.99923	0	0
Job Retention and Rehabilitation Pilot	Cambridgeshire and Suffolk	0	2	17.78	17		South	0	0	0	1	1639	719	0.2	8.607	3	0	0			11	0	0	1.31637	0	0	4.89601	1	4.89601	0	0
Job Retention and Rehabilitation Pilot	Cheshire, Halton and Warrington	0	2.2	20.33	6		North	1	0	0	0	1654	234	0.7	6.067	3	0	0			4	0	0	3.57013	0	0	9.15774	1	9.15774	0	0
Job Retention and Rehabilitation Pilot	Coventry and Warwickshire	0	2.9	16.58	24		Midlands	0	1	0	0	734	207	0.4	5.056	6	0	0			14	0	0	1.17089	0	0	7.97666	1	7.97666	0	0
Job Retention and Rehabilitation Pilot	Cumbria and Lancashire	0	2.3	19.87	7		North	1	0	0	0	1212	984	0.1	11.59	7	0	0			8	0	0	1.22174	0	0	2.47714	1	2.47714	0	0
Job Retention and Rehabilitation Pilot	Derbyshire	0	2.6	17.69	20		Midlands	0	1	0	0	825	262	0.3	5.96	4	0	0			7	0	0	1.04362	0	0	12.0721	1	12.0721	0	0
Job Retention and Rehabilitation Pilot	Devon and Cornwall	0	1.7	18.69	11		South	0	0	0	1	684	1027	0.1	9.404	9	0	0			5	0	0	2.47554	0	0	3.83879	1	3.83879	0	0
Job Retention and Rehabilitation Pilot	Dorset and Somerset	0	1.3	20.57	4		South	0	0	0	1	841	610	0.1	6.932	3	0	0			6	0	0	2.75534	0	0	6.36757	1	6.36757	0	0
Job Retention and Rehabilitation Pilot	Essex	0	2	19.22	10		South	0	0	0	1	879	367	0.2	9.899	5	0	0			10	0	0	1.16173	0	0	3.55793	1	3.55793	0	0
Job Retention and Rehabilitation Pilot	Gloucestershire, Wiltshire and Swindon	0	1.5	16.55	27		South	0	0	0	1	847	614	0.1	7.24	2	0	0			7	0	0	2.09392	0	0	8.88536	1	8.88536	0	0
Job Retention and Rehabilitation Pilot	Hampshire and Isle of Wight	0	1.6	20.82	3		South	0	0	0	1	706	415	0.2	11.11	3	0	0			8	0	0	2.75248	0	0	4.12781	1	4.12781	0	0
Job Retention and Rehabilitation Pilot	Kent	1	2.2	17.8	16		South	0	0	0	1	1380	374	0.4	9.63	3	0	0			9	0	0	1.26168	0	0	5.66978	1	5.66978	0	0
Job Retention and Rehabilitation Pilot	Leicestershire, Rutland and Northamptonshire	0	2.5	17.41	22		Midlands	0	1	0	0	706	490	0.1	9.88	4	0	0			14	0	0	2.51518	0	0	4.81174	1	4.81174	0	0
Job Retention and Rehabilitation Pilot	London (Brent, Harrow and Hillingdon)	0	3.5	13.33	37		London	0	0	1	0	900	21	4.3	4.681	3	0	0			39	0	0	2.62551	0	0	7.93207	1	7.93207	0	0
Job Retention and Rehabilitation Pilot	London (Central)	0	3.6	13.16	38		London	0	0	1	0	1879	7	26.8	5.527	5	0	0			29	0	0	3.56432	0	0	9.81907	1	9.81907	0	0
Job Retention and Rehabilitation Pilot	London (City and East)	0	7.3	15.29	32		London	0	0	1	0	1179	8	14.7	4.534	7	0	0			43	0	0	2.74151	0	0	23.7583	1	23.7583	0	0
Job Retention and Rehabilitation Pilot	London (Lambeth, Southwark and Wandsworth)	0	4.3	12.32	40		London	0	0	1	0	1354	9	15	5.698	5	0	0			29	0	0	4.48403	0	0	14.0347	1	14.0347	0	0
Job Retention and Rehabilitation Pilot	London (North East)	0	3.8	16.23	28		London	0	0	1	0	834	24	3.5	5.397	4	0	0			31	0	0	3.81323	0	0	7.99333	1	7.99333	0	0
Job Retention and Rehabilitation Pilot	London (North)	0	4.5	14.38	35		London	0	0	1	0	1687	20	8.4	5.391	3	0	0			31	0	0	5.76145	0	0	15.4183	1	15.4183	0	0
Job Retention and Rehabilitation Pilot	London (South East)	0	3.8	20.49	5		London	0	0	1	0	1119	14	8	4.467	6	0	0			26	0	0	3.98702	0	0	14.1639	1	14.1639	0	0
Job Retention and Rehabilitation Pilot	London (South)	0	2	14.84	34		London	0	0	1	0	1748	41	4.3	8.583	3	0	0			23	0	0	4.71513	0	0	6.48841	1	6.48841	0	0
Job Retention and Rehabilitation Pilot	London (West)	0	3.3	15.68	30		London	0	0	1	0	781	13	6	4.73	2	0	0			34	0	0	3.64693	0	0	22.2896	1	22.2896	0	0
Job Retention and Rehabilitation Pilot	Manchester (Central)	0	4	15.06	33		North	1	0	0	0	1084	32	3.4	5.512	7	0	0			18	0	0	2.39478	0	0	9.082	1	9.082	0	0
Job Retention and Rehabilitation Pilot	Manchester (East and West)	0	3.1	19.54	9		North	1	0	0	0	1458	96	1.5	10.233	7	0	0			11	0	0	3.41933	0	0	6.24059	1	6.24059	0	0
Job Retention and Rehabilitation Pilot	Marches	0	2	21.13	1		Midlands	0	1	0	0	1297	741	0.2	7.062	7	0	0			6	0	0	2.18918	0	0	15.6938	1	15.6938	0	0
Job Retention and Rehabilitation Pilot	Merseyside	0	5.5	14.37	36		North	1	0	0	0	1000	64	1.6	8.258	9	0	0			6	0	0	1.61298	0	0	4.73965	1	4.73965	0	0
Job Retention and Rehabilitation Pilot	Norfolk	0	2.3	17.77	18		South	0	0	0	1	1061	537	0.2	4.791	2	0	0			7	0	0	0.30683	0	0	11.2169	1	11.2169	0	0
Job Retention and Rehabilitation Pilot	North East Yorkshire and the Humber	0	2.8	17.9	15		North	1	0	0	0	833	1183	0.1	10.006	3	0	0			7	0	0	2.29562	0	0	2.78133	1	2.78133	0	0
Job Retention and Rehabilitation Pilot	Northumbria	1	3.1	15.31	31		North	1	0	0	0	1944	542	0.4	6.841	10	0	0			7	0	0	2.70136	0	0	11.0072	1	11.0072	0	0
Job Retention and Rehabilitation Pilot	Nottinghamshire and Lincolnshire	0	2.7	18.26	14		Midlands	0	1	0	0	2622	808	0.3	10.397	8	0	0			9	0	0	0.89353	0	0	3.2721	1	3.2721	0	0
Job Retention and Rehabilitation Pilot	South Tyne and Wear Valley	0	4.3	17.66	21		North	1	0	0	0	993	236	0.4	4.802	8	0	0			5	0	0	2.4115	0	0	13.3132	1	13.3132	0	0
Job Retention and Rehabilitation Pilot	South Yorkshire	1	3.5	17.72	19		North	1	0	0	0	1652	155	1.1	7.845	9	0	0			10	0	0	2.07266	0	0	14.3531	1	14.3531	0	0
Job Retention and Rehabilitation Pilot	Staffordshire	0	2.2	20.86	2		Midlands	0	1	0	0	656	271	0.2	6.501	1	0	0			7	0	0	1.66897	0	0	6.38517	1	6.38517	0	0
Job Retention and Rehabilitation Pilot	Surrey and Sussex	0	1.5	16.58	25		South	0	0	0	1	2168	544	0.4	15.376	5	0	0			10	0	0	1.09781	0	0	3.7526	1	3.7526	0	0
Job Retention and Rehabilitation Pilot	Tees Valley	1	4.8	16.66	23		North	1	0	0	0	1226	79	1.6	3.984	5	0	0			6	0	0	4.10392	0	0	18.6145	1	18.6145	0	0
Job Retention and Rehabilitation Pilot	Thames Valley (Berks, Bucks, Oxfs)	0	1.4	16.03	29		South	0	0	0	1	1052	574	0.2	13.476	4	0	0			14	0	0	2.68106	0	0	3.32072	1	3.32072	0	0
Job Retention and Rehabilitation Pilot	West Of England	0	1.7	19.76	8		South	0	0	0	1	1674	133	1.3	6.329	6	0	0			10	0	0	1.83441	0	0	5.71022	1	5.71022	0	0
Job Retention and Rehabilitation Pilot	West Yorkshire	0	3.3	18.49	13		North	1	0	0	0	2180	203	1.1	13.065	9	0	0			16	0	0	1.41906	0	0	2.33295	1	2.33295	0	0
Jobcentre Plus Pathfinder	Bedfordshire and Hertfordshire	0	2	14.91	12		South	0	0	0	1	1221	288	0.4	10.06	4	1	1			15	0	0	1.55467	0	0	3.32505	0	0	12	12
Jobcentre Plus Pathfinder	Birmingham and Solihull	1	6.9	9.95	40		Midlands	0	1	0	0	1834	45	4.1	7.242	5	1	1			29	0	0	0.7636	0	0	6.24827	0	0	40	40
Jobcentre Plus Pathfinder	Black Country	0	5.4	11.53	37		Midlands	0	1	0	0	1636	36	4.5	6.501	3	1	1			19	0	0	5.12844	0	0	4.99923	0	0	37	37
Jobcentre Plus Pathfinder	Cambridgeshire and Suffolk	0	2	14.7	14		South	0	0	0	1	1639	719	0.2	8.607	3	1	1			11	0	0	1.31637	0	0	4.89601	0	0	14	14
Jobcentre Plus Pathfinder	Cheshire, Halton and Warrington	0	2.2	17.46	2		North	1	0	0	0	1654	234	0.7	6.067	3	1	1			4	0	0	3.57013	0	0	9.15774	0	0	2	2
Jobcentre Plus Pathfinder	Coventry and Warwickshire	0	2.9	13.84	21		Midlands	0	1	0	0	734	207	0.4	5.056	4	1	1			14	0	0	1.17089	0	0	7.97666	0	0	21	21
Jobcentre Plus Pathfinder	Cumbria and Lancashire	1	2.3	15.99	6		North	1	0	0	0	1212	984	0.1	11.59	3	1	1			8	0	0	1.22174	0	0	2.47714	0	0	6	6
Jobcentre Plus Pathfinder	Derbyshire	1	2.6	12.5	33		Midlands	0	1	0	0	825	262	0.3	5.96	3	1	1			7	0	0	1.04362	0	0	12.0721	0	0	33	33
Jobcentre Plus Pathfinder	Devon and Cornwall	1	1.7	16.3	4		South	0	0	0	1	684	1027	0.1	9.404	7	1	1			5	0	0	2.47554	0	0	3.83879	0	0	4	4
Jobcentre Plus Pathfinder	Dorset and Somerset	0	1.3	15.88	9		South	0	0	0	1	841	610	0.1	6.932	3	1	1			6	0	0	2.75534	0	0	6.36757	0	0	9	9
Jobcentre Plus Pathfinder	Essex	1	2	15.69	10		South	0	0	0	1	879	367	0.2	9.899	3	1	1			10	0	0	1.16173	0	0	3.55793	0	0	10	10
Jobcentre Plus Pathfinder	Gloucestershire, Wiltshire and Swindon	0	1.5	14.51	15		South	0	0	0	1	847	614	0.1	7.24	2	1	1			7	0	0	2.09392	0	0	8.88536	0	0	15	15
Jobcentre Plus Pathfinder	Hampshire and Isle of Wight	1	1.6	15.94	8		South	0	0	0	1	706	415	0.2	11.11	2	1	1			8	0	0	2.75248	0	0	4.12781	0	0	8	8
Jobcentre Plus Pathfinder	Kent	0	2.2	13.95	20		South	0	0	0	1	1380	374	0.4	9.63	2	1	1			9	0	0	1.26168	0	0	5.66978	0	0	20	20
Jobcentre Plus Pathfinder	Leicestershire, Rutland and Northamptonshire	0	2.5	14.35	18		Midlands	0	1	0	0	706	490	0.1	9.88	3	1	1			14	0	0	2.51518	0	0	4.81174	0	0	18	18
Jobcentre Plus Pathfinder	London (Brent, Harrow and Hillingdon)	1	3.5	12.54	32		London	0	0	1	0	900	21	4.3	4.681	1	1	1			39	0	0	2.62551	0	0	7.93207	0	0	32	32
Jobcentre Plus Pathfinder	London (Central)	0	3.6	11	38		London	0	0	1	0	1879	7	26.8	5.527	3	1	1			29	0	0	3.56432	0	0	9.81907	0	0	38	38
Jobcentre Plus Pathfinder	London (City and East)	0	7.3	12.76	29		London	0	0	1	0	1179	8	14.7	4.534	5	1	1			43	0	0	2.74151	0	0	23.7583	0	0	29	29
Jobcentre Plus Pathfinder	London (Lambeth, Southwark and Wandsworth)	1	4.3	10.44	39		London	0	0	1	0	1354	9	15	5.698	2	1	1			29	0	0	4.48403	0	0	14.0347	0	0	39	39
Jobcentre Plus Pathfinder	London (North East)	0	3.8	12.56	31		London	0	0	1	0	834	24	3.5	5.397	3	1	1			31	0	0	3.81323	0	0	7.99333	0	0	31	31
Jobcentre Plus Pathfinder	London (North)	0	4.5	12.29	34		London	0	0	1	0	1687	20	8.4	5.391	2	1	1			31	0	0	5.76145	0	0	15.4183	0	0	34	34
Jobcentre Plus Pathfinder	London (South East)	0	3.8	17.86	1		London	0	0	1	0	1119	14	8	4.467	3	1	1			26	0	0	3.98702	0	0	14.1639	0	0	1	1
Jobcentre Plus Pathfinder	London (South)	0	2	13.36	26		London	0	0	1	0	1748	41	4.3	8.583	2	1	1			23	0	0	4.71513	0	0	6.48841	0	0	26	26
Jobcentre Plus Pathfinder	London (West)	0	3.3	14.46	16		London	0	0	1	0	781	13	6	4.73	2	1	1			34	0	0	3.64693	0	0	22.2896	0	0	16	16
Jobcentre Plus Pathfinder	Manchester (Central)	1	4	13.1	27		North	1	0	0	0	1084	32	3.4	5.512	2	1	1			18	0	0	2.39478	0	0	9.082	0	0	27	27
Jobcentre Plus Pathfinder	Manchester (East and West)	0	3.1	16.28	5		North	1	0	0	0	1458	96	1.5	10.233	4	1	1			11	0	0	3.41933	0	0	6.24059	0	0	5	5
Jobcentre Plus Pathfinder	Marches	1	2	15.98	7		Midlands	0	1	0	0	1297	741	0.2	7.062	6	1	1			6	0	0	2.18918	0	0	15.6938	0	0	7	7
Jobcentre Plus Pathfinder	Merseyside	1	5.5	11.57	36		North	1	0	0	0	1000	64	1.6	8.258	5	1	1			6	0	0	1.61298	0	0	4.73965	0	0	36	36
Jobcentre Plus Pathfinder	Norfolk	0	2.3	13.55	25		South	0	0	0	1	1061	537	0.2	4.791	1	1	1			7	0	0	0.30683	0	0	11.2169	0	0	25	25
Jobcentre Plus Pathfinder	North East Yorkshire and the Humber	0	2.8	13.99	19		North	1	0	0	0	833	1183	0.1	10.006	3	1	1			7	0	0	2.29562	0	0	2.78133	0	0	19	19
Jobcentre Plus Pathfinder	Northumbria	1	3.1	12.84	28		North	1	0	0	0	1944	542	0.4	6.841	8	1	1			7	0	0	2.70136	0	0	11.0072	0	0	28	28
Jobcentre Plus Pathfinder	Nottinghamshire and Lincolnshire	0	2.7	13.79	23		Midlands	0	1	0	0	2622	808	0.3	10.397	6	1	1			9	0	0	0.89353	0	0	3.2721	0	0	23	23
Jobcentre Plus Pathfinder	South Tyne and Wear Valley	0	4.3	12.64	30		North	1	0	0	0	993	236	0.4	4.802	7	1	1			5	0	0	2.4115	0	0	13.3132	0	0	30	30
Jobcentre Plus Pathfinder	South Yorkshire	0	3.5	14.73	13		North	1	0	0	0	1652	155	1.1	7.845	6	1	1			10	0	0	2.07266	0	0	14.3531	0	0	13	13
Jobcentre Plus Pathfinder	Staffordshire	0	2.2	15.13	11		Midlands	0	1	0	0	656	271	0.2	6.501	1	1	1			7	0	0	1.66897	0	0	6.38517	0	0	11	11
Jobcentre Plus Pathfinder	Surrey and Sussex	0	1.5	13.83	22		South	0	0	0	1	2168	544	0.4	15.376	4	1	1			10	0	0	1.09781	0	0	3.7526	0	0	22	22
Jobcentre Plus Pathfinder	Tees Valley	0	4.8	11.95	35		North	1	0	0	0	1226	79	1.6	3.984	4	1	1			6	0	0	4.10392	0	0	18.6145	0	0	35	35
Jobcentre Plus Pathfinder	Thames Valley (Berks, Bucks, Oxfs)	0	1.4	14.44	17		South	0	0	0	1	1052	574	0.2	13.476	4	1	1			14	0	0	2.68106	0	0	3.32072	0	0	17	17
Jobcentre Plus Pathfinder	West Of England	0	1.7	17.03	3		South	0	0	0	1	1674	133	1.3	6.329	3	1	1			10	0	0	1.83441	0	0	5.71022	0	0	3	3
Jobcentre Plus Pathfinder	West Yorkshire	1	3.3	13.66	24		North	1	0	0	0	2180	203	1.1	13.065	4	1	1			16	0	0	1.41906	0	0	2.33295	0	0	24	24
Jobcentre Plus Window Display Pilot	Bedfordshire and Hertfordshire	0	2	18.56	12		South	0	0	0	1	1221	288	0.4	10.06	5	0	1			15	0	0	1.55467	0	0	3.32505	0	0	0	12
Jobcentre Plus Window Display Pilot	Birmingham and Solihull	0	6.9	13.11	39		Midlands	0	1	0	0	1834	45	4.1	7.242	9	0	1			29	0	0	0.7636	0	0	6.24827	0	0	0	39
Jobcentre Plus Window Display Pilot	Black Country	0	5.4	16.57	26		Midlands	0	1	0	0	1636	36	4.5	6.501	8	0	1			19	0	0	5.12844	0	0	4.99923	0	0	0	26
Jobcentre Plus Window Display Pilot	Cambridgeshire and Suffolk	0	2	17.78	17		South	0	0	0	1	1639	719	0.2	8.607	3	0	1			11	0	0	1.31637	0	0	4.89601	0	0	0	17
Jobcentre Plus Window Display Pilot	Cheshire, Halton and Warrington	0	2.2	20.33	6		North	1	0	0	0	1654	234	0.7	6.067	3	0	1			4	0	0	3.57013	0	0	9.15774	0	0	0	6
Jobcentre Plus Window Display Pilot	Coventry and Warwickshire	0	2.9	16.58	24		Midlands	0	1	0	0	734	207	0.4	5.056	6	0	1			14	0	0	1.17089	0	0	7.97666	0	0	0	24
Jobcentre Plus Window Display Pilot	Cumbria and Lancashire	0	2.3	19.87	7		North	1	0	0	0	1212	984	0.1	11.59	8	0	1			8	0	0	1.22174	0	0	2.47714	0	0	0	7
Jobcentre Plus Window Display Pilot	Derbyshire	0	2.6	17.69	20		Midlands	0	1	0	0	825	262	0.3	5.96	6	0	1			7	0	0	1.04362	0	0	12.0721	0	0	0	20
Jobcentre Plus Window Display Pilot	Devon and Cornwall	1	1.7	18.69	11		South	0	0	0	1	684	1027	0.1	9.404	9	0	1			5	0	0	2.47554	0	0	3.83879	0	0	0	11
Jobcentre Plus Window Display Pilot	Dorset and Somerset	1	1.3	20.57	4		South	0	0	0	1	841	610	0.1	6.932	4	0	1			6	0	0	2.75534	0	0	6.36757	0	0	0	4
Jobcentre Plus Window Display Pilot	Essex	0	2	19.22	10		South	0	0	0	1	879	367	0.2	9.899	6	0	1			10	0	0	1.16173	0	0	3.55793	0	0	0	10
Jobcentre Plus Window Display Pilot	Gloucestershire, Wiltshire and Swindon	1	1.5	16.55	27		South	0	0	0	1	847	614	0.1	7.24	2	0	1			7	0	0	2.09392	0	0	8.88536	0	0	0	27
Jobcentre Plus Window Display Pilot	Hampshire and Isle of Wight	0	1.6	20.82	3		South	0	0	0	1	706	415	0.2	11.11	3	0	1			8	0	0	2.75248	0	0	4.12781	0	0	0	3
Jobcentre Plus Window Display Pilot	Kent	0	2.2	17.8	16		South	0	0	0	1	1380	374	0.4	9.63	4	0	1			9	0	0	1.26168	0	0	5.66978	0	0	0	16
Jobcentre Plus Window Display Pilot	Leicestershire, Rutland and Northamptonshire	0	2.5	17.41	22		Midlands	0	1	0	0	706	490	0.1	9.88	4	0	1			14	0	0	2.51518	0	0	4.81174	0	0	0	22
Jobcentre Plus Window Display Pilot	London (Brent, Harrow and Hillingdon)	0	3.5	13.33	37		London	0	0	1	0	900	21	4.3	4.681	4	0	1			39	0	0	2.62551	0	0	7.93207	0	0	0	37
Jobcentre Plus Window Display Pilot	London (Central)	0	3.6	13.16	38		London	0	0	1	0	1879	7	26.8	5.527	6	0	1			29	0	0	3.56432	0	0	9.81907	0	0	0	38
Jobcentre Plus Window Display Pilot	London (City and East)	0	7.3	15.29	32		London	0	0	1	0	1179	8	14.7	4.534	9	0	1			43	0	0	2.74151	0	0	23.7583	0	0	0	32
Jobcentre Plus Window Display Pilot	London (Lambeth, Southwark and Wandsworth)	0	4.3	12.32	40		London	0	0	1	0	1354	9	15	5.698	6	0	1			29	0	0	4.48403	0	0	14.0347	0	0	0	40
Jobcentre Plus Window Display Pilot	London (North East)	0	3.8	16.23	28		London	0	0	1	0	834	24	3.5	5.397	5	0	1			31	0	0	3.81323	0	0	7.99333	0	0	0	28
Jobcentre Plus Window Display Pilot	London (North)	0	4.5	14.38	35		London	0	0	1	0	1687	20	8.4	5.391	4	0	1			31	0	0	5.76145	0	0	15.4183	0	0	0	35
Jobcentre Plus Window Display Pilot	London (South East)	0	3.8	20.49	5		London	0	0	1	0	1119	14	8	4.467	7	0	1			26	0	0	3.98702	0	0	14.1639	0	0	0	5
Jobcentre Plus Window Display Pilot	London (South)	0	2	14.84	34		London	0	0	1	0	1748	41	4.3	8.583	4	0	1			23	0	0	4.71513	0	0	6.48841	0	0	0	34
Jobcentre Plus Window Display Pilot	London (West)	0	3.3	15.68	30		London	0	0	1	0	781	13	6	4.73	3	0	1			34	0	0	3.64693	0	0	22.2896	0	0	0	30
Jobcentre Plus Window Display Pilot	Manchester (Central)	0	4	15.06	33		North	1	0	0	0	1084	32	3.4	5.512	9	0	1			18	0	0	2.39478	0	0	9.082	0	0	0	33
Jobcentre Plus Window Display Pilot	Manchester (East and West)	0	3.1	19.54	9		North	1	0	0	0	1458	96	1.5	10.233	7	0	1			11	0	0	3.41933	0	0	6.24059	0	0	0	9
Jobcentre Plus Window Display Pilot	Marches	0	2	21.13	1		Midlands	0	1	0	0	1297	741	0.2	7.062	7	0	1			6	0	0	2.18918	0	0	15.6938	0	0	0	1
Jobcentre Plus Window Display Pilot	Merseyside	0	5.5	14.37	36		North	1	0	0	0	1000	64	1.6	8.258	9	0	1			6	0	0	1.61298	0	0	4.73965	0	0	0	36
Jobcentre Plus Window Display Pilot	Norfolk	0	2.3	17.77	18		South	0	0	0	1	1061	537	0.2	4.791	2	0	1			7	0	0	0.30683	0	0	11.2169	0	0	0	18
Jobcentre Plus Window Display Pilot	North East Yorkshire and the Humber	0	2.8	17.9	15		North	1	0	0	0	833	1183	0.1	10.006	3	0	1			7	0	0	2.29562	0	0	2.78133	0	0	0	15
Jobcentre Plus Window Display Pilot	Northumbria	0	3.1	15.31	31		North	1	0	0	0	1944	542	0.4	6.841	13	0	1			7	0	0	2.70136	0	0	11.0072	0	0	0	31
Jobcentre Plus Window Display Pilot	Nottinghamshire and Lincolnshire	0	2.7	18.26	14		Midlands	0	1	0	0	2622	808	0.3	10.397	8	0	1			9	0	0	0.89353	0	0	3.2721	0	0	0	14
Jobcentre Plus Window Display Pilot	South Tyne and Wear Valley	0	4.3	17.66	21		North	1	0	0	0	993	236	0.4	4.802	8	0	1			5	0	0	2.4115	0	0	13.3132	0	0	0	21
Jobcentre Plus Window Display Pilot	South Yorkshire	0	3.5	17.72	19		North	1	0	0	0	1652	155	1.1	7.845	10	0	1			10	0	0	2.07266	0	0	14.3531	0	0	0	19
Jobcentre Plus Window Display Pilot	Staffordshire	0	2.2	20.86	2		Midlands	0	1	0	0	656	271	0.2	6.501	1	0	1			7	0	0	1.66897	0	0	6.38517	0	0	0	2
Jobcentre Plus Window Display Pilot	Surrey and Sussex	0	1.5	16.58	25		South	0	0	0	1	2168	544	0.4	15.376	5	0	1			10	0	0	1.09781	0	0	3.7526	0	0	0	25
Jobcentre Plus Window Display Pilot	Tees Valley	0	4.8	16.66	23		North	1	0	0	0	1226	79	1.6	3.984	6	0	1			6	0	0	4.10392	0	0	18.6145	0	0	0	23
Jobcentre Plus Window Display Pilot	Thames Valley (Berks, Bucks, Oxfs)	0	1.4	16.03	29		South	0	0	0	1	1052	574	0.2	13.476	4	0	1			14	0	0	2.68106	0	0	3.32072	0	0	0	29
Jobcentre Plus Window Display Pilot	West Of England	0	1.7	19.76	8		South	0	0	0	1	1674	133	1.3	6.329	6	0	1			10	0	0	1.83441	0	0	5.71022	0	0	0	8
Jobcentre Plus Window Display Pilot	West Yorkshire	0	3.3	18.49	13		North	1	0	0	0	2180	203	1.1	13.065	9	0	1			16	0	0	1.41906	0	0	2.33295	0	0	0	13
Jobseeker Mandatory Activity	Bedfordshire and Hertfordshire	1	2	15.62	18		South	0	0	0	1	1221	288	0.4	10.06	7	0	1			15	0	0	1.55467	0	0	3.32505	0	0	0	18
Jobseeker Mandatory Activity	Birmingham and Solihull	0	6.9	10.2	40		Midlands	0	1	0	0	1834	45	4.1	7.242	15	0	1			29	0	0	0.7636	0	0	6.24827	0	0	0	40
Jobseeker Mandatory Activity	Black Country	0	5.4	15.54	19		Midlands	0	1	0	0	1636	36	4.5	6.501	12	0	1			19	0	0	5.12844	0	0	4.99923	0	0	0	19
Jobseeker Mandatory Activity	Cambridgeshire and Suffolk	0	2	13.94	26		South	0	0	0	1	1639	719	0.2	8.607	5	0	1			11	0	0	1.31637	0	0	4.89601	0	0	0	26
Jobseeker Mandatory Activity	Cheshire, Halton and Warrington	1	2.2	16.68	12		North	1	0	0	0	1654	234	0.7	6.067	4	0	1			4	0	0	3.57013	0	0	9.15774	0	0	0	12
Jobseeker Mandatory Activity	Coventry and Warwickshire	0	2.9	13.68	31		Midlands	0	1	0	0	734	207	0.4	5.056	8	0	1			14	0	0	1.17089	0	0	7.97666	0	0	0	31
Jobseeker Mandatory Activity	Cumbria and Lancashire	1	2.3	16.79	10		North	1	0	0	0	1212	984	0.1	11.59	11	0	1			8	0	0	1.22174	0	0	2.47714	0	0	0	10
Jobseeker Mandatory Activity	Derbyshire	0	2.6	13.76	28		Midlands	0	1	0	0	825	262	0.3	5.96	8	0	1			7	0	0	1.04362	0	0	12.0721	0	0	0	28
Jobseeker Mandatory Activity	Devon and Cornwall	0	1.7	16.26	13		South	0	0	0	1	684	1027	0.1	9.404	12	0	1			5	0	0	2.47554	0	0	3.83879	0	0	0	13
Jobseeker Mandatory Activity	Dorset and Somerset	0	1.3	18.5	3		South	0	0	0	1	841	610	0.1	6.932	8	0	1			6	0	0	2.75534	0	0	6.36757	0	0	0	3
Jobseeker Mandatory Activity	Essex	0	2	16.73	11		South	0	0	0	1	879	367	0.2	9.899	9	0	1			10	0	0	1.16173	0	0	3.55793	0	0	0	11
Jobseeker Mandatory Activity	Gloucestershire, Wiltshire and Swindon	0	1.5	14.93	22		South	0	0	0	1	847	614	0.1	7.24	4	0	1			7	0	0	2.09392	0	0	8.88536	0	0	0	22
Jobseeker Mandatory Activity	Hampshire and Isle of Wight	0	1.6	20.08	1		South	0	0	0	1	706	415	0.2	11.11	5	0	1			8	0	0	2.75248	0	0	4.12781	0	0	0	1
Jobseeker Mandatory Activity	Kent	0	2.2	17.24	8		South	0	0	0	1	1380	374	0.4	9.63	6	0	1			9	0	0	1.26168	0	0	5.66978	0	0	0	8
Jobseeker Mandatory Activity	Leicestershire, Rutland and Northamptonshire	0	2.5	13.85	27		Midlands	0	1	0	0	706	490	0.1	9.88	10	0	1			14	0	0	2.51518	0	0	4.81174	0	0	0	27
Jobseeker Mandatory Activity	London (Brent, Harrow and Hillingdon)	0	3.5	13.33	33		London	0	0	1	0	900	21	4.3	4.681	7	0	1			39	0	0	2.62551	0	0	7.93207	0	0	0	33
Jobseeker Mandatory Activity	London (Central)	0	3.6	11.81	39		London	0	0	1	0	1879	7	26.8	5.527	10	0	1			29	0	0	3.56432	0	0	9.81907	0	0	0	39
Jobseeker Mandatory Activity	London (City and East)	0	7.3	11.89	38		London	0	0	1	0	1179	8	14.7	4.534	13	0	1			43	0	0	2.74151	0	0	23.7583	0	0	0	38
Jobseeker Mandatory Activity	London (Lambeth, Southwark and Wandsworth)	0	4.3	12.14	37		London	0	0	1	0	1354	9	15	5.698	8	0	1			29	0	0	4.48403	0	0	14.0347	0	0	0	37
Jobseeker Mandatory Activity	London (North East)	0	3.8	13.76	29		London	0	0	1	0	834	24	3.5	5.397	8	0	1			31	0	0	3.81323	0	0	7.99333	0	0	0	29
Jobseeker Mandatory Activity	London (North)	0	4.5	12.91	35		London	0	0	1	0	1687	20	8.4	5.391	8	0	1			31	0	0	5.76145	0	0	15.4183	0	0	0	35
Jobseeker Mandatory Activity	London (South East)	1	3.8	19.61	2		London	0	0	1	0	1119	14	8	4.467	11	0	1			26	0	0	3.98702	0	0	14.1639	0	0	0	2
Jobseeker Mandatory Activity	London (South)	1	2	14	25		London	0	0	1	0	1748	41	4.3	8.583	8	0	1			23	0	0	4.71513	0	0	6.48841	0	0	0	25
Jobseeker Mandatory Activity	London (West)	0	3.3	15.85	17		London	0	0	1	0	781	13	6	4.73	6	0	1			34	0	0	3.64693	0	0	22.2896	0	0	0	17
Jobseeker Mandatory Activity	Manchester (Central)	0	4	16.2	15		North	1	0	0	0	1084	32	3.4	5.512	13	0	1			18	0	0	2.39478	0	0	9.082	0	0	0	15
Jobseeker Mandatory Activity	Manchester (East and West)	0	3.1	17.08	9		North	1	0	0	0	1458	96	1.5	10.233	11	0	1			11	0	0	3.41933	0	0	6.24059	0	0	0	9
Jobseeker Mandatory Activity	Marches	0	2	17.61	6		Midlands	0	1	0	0	1297	741	0.2	7.062	9	0	1			6	0	0	2.18918	0	0	15.6938	0	0	0	6
Jobseeker Mandatory Activity	Merseyside	0	5.5	12.37	36		North	1	0	0	0	1000	64	1.6	8.258	12	0	1			6	0	0	1.61298	0	0	4.73965	0	0	0	36
Jobseeker Mandatory Activity	Norfolk	0	2.3	12.92	34		South	0	0	0	1	1061	537	0.2	4.791	4	0	1			7	0	0	0.30683	0	0	11.2169	0	0	0	34
Jobseeker Mandatory Activity	North East Yorkshire and the Humber	0	2.8	14.55	23		North	1	0	0	0	833	1183	0.1	10.006	5	0	1			7	0	0	2.29562	0	0	2.78133	0	0	0	23
Jobseeker Mandatory Activity	Northumbria	0	3.1	15.49	20		North	1	0	0	0	1944	542	0.4	6.841	19	0	1			7	0	0	2.70136	0	0	11.0072	0	0	0	20
Jobseeker Mandatory Activity	Nottinghamshire and Lincolnshire	0	2.7	15.92	16		Midlands	0	1	0	0	2622	808	0.3	10.397	12	0	1			9	0	0	0.89353	0	0	3.2721	0	0	0	16
Jobseeker Mandatory Activity	South Tyne and Wear Valley	0	4.3	18	4		North	1	0	0	0	993	236	0.4	4.802	9	0	1			5	0	0	2.4115	0	0	13.3132	0	0	0	4
Jobseeker Mandatory Activity	South Yorkshire	0	3.5	15.43	21		North	1	0	0	0	1652	155	1.1	7.845	12	0	1			10	0	0	2.07266	0	0	14.3531	0	0	0	21
Jobseeker Mandatory Activity	Staffordshire	1	2.2	17.93	5		Midlands	0	1	0	0	656	271	0.2	6.501	3	0	1			7	0	0	1.66897	0	0	6.38517	0	0	0	5
Jobseeker Mandatory Activity	Surrey and Sussex	1	1.5	13.59	32		South	0	0	0	1	2168	544	0.4	15.376	9	0	1			10	0	0	1.09781	0	0	3.7526	0	0	0	32
Jobseeker Mandatory Activity	Tees Valley	0	4.8	14.52	24		North	1	0	0	0	1226	79	1.6	3.984	8	0	1			6	0	0	4.10392	0	0	18.6145	0	0	0	24
Jobseeker Mandatory Activity	Thames Valley (Berks, Bucks, Oxfs)	1	1.4	13.75	30		South	0	0	0	1	1052	574	0.2	13.476	8	0	1			14	0	0	2.68106	0	0	3.32072	0	0	0	30
Jobseeker Mandatory Activity	West Of England	0	1.7	17.32	7		South	0	0	0	1	1674	133	1.3	6.329	7	0	1			10	0	0	1.83441	0	0	5.71022	0	0	0	7
Jobseeker Mandatory Activity	West Yorkshire	1	3.3	16.24	14		North	1	0	0	0	2180	203	1.1	13.065	16	0	1			16	0	0	1.41906	0	0	2.33295	0	0	0	14
JSA Intervention Regime Pilots	Bedfordshire and Hertfordshire	0	2	19.81	20		South	0	0	0	1	1221	288	0.4	10.06	7	0	1			15	0	0	1.55467	0	0	3.32505	0	0	0	20
JSA Intervention Regime Pilots	Birmingham and Solihull	1	6.9	13.46	38		Midlands	0	1	0	0	1834	45	4.1	7.242	13	0	1			29	0	0	0.7636	0	0	6.24827	0	0	0	38
JSA Intervention Regime Pilots	Black Country	0	5.4	20.22	18		Midlands	0	1	0	0	1636	36	4.5	6.501	12	0	1			19	0	0	5.12844	0	0	4.99923	0	0	0	18
JSA Intervention Regime Pilots	Cambridgeshire and Suffolk	0	2	17.37	28		South	0	0	0	1	1639	719	0.2	8.607	4	0	1			11	0	0	1.31637	0	0	4.89601	0	0	0	28
JSA Intervention Regime Pilots	Cheshire, Halton and Warrington	0	2.2	24.52	3		North	1	0	0	0	1654	234	0.7	6.067	4	0	1			4	0	0	3.57013	0	0	9.15774	0	0	0	3
JSA Intervention Regime Pilots	Coventry and Warwickshire	0	2.9	18.34	24		Midlands	0	1	0	0	734	207	0.4	5.056	7	0	1			14	0	0	1.17089	0	0	7.97666	0	0	0	24
JSA Intervention Regime Pilots	Cumbria and Lancashire	0	2.3	21.08	12		North	1	0	0	0	1212	984	0.1	11.59	10	0	1			8	0	0	1.22174	0	0	2.47714	0	0	0	12
JSA Intervention Regime Pilots	Derbyshire	0	2.6	17.58	26		Midlands	0	1	0	0	825	262	0.3	5.96	7	0	1			7	0	0	1.04362	0	0	12.0721	0	0	0	26
JSA Intervention Regime Pilots	Devon and Cornwall	1	1.7	20.72	15		South	0	0	0	1	684	1027	0.1	9.404	10	0	1			5	0	0	2.47554	0	0	3.83879	0	0	0	15
JSA Intervention Regime Pilots	Dorset and Somerset	0	1.3	22.91	7		South	0	0	0	1	841	610	0.1	6.932	7	0	1			6	0	0	2.75534	0	0	6.36757	0	0	0	7
JSA Intervention Regime Pilots	Essex	0	2	20.83	14		South	0	0	0	1	879	367	0.2	9.899	8	0	1			10	0	0	1.16173	0	0	3.55793	0	0	0	14
JSA Intervention Regime Pilots	Gloucestershire, Wiltshire and Swindon	0	1.5	21.03	13		South	0	0	0	1	847	614	0.1	7.24	3	0	1			7	0	0	2.09392	0	0	8.88536	0	0	0	13
JSA Intervention Regime Pilots	Hampshire and Isle of Wight	0	1.6	24.61	2		South	0	0	0	1	706	415	0.2	11.11	5	0	1			8	0	0	2.75248	0	0	4.12781	0	0	0	2
JSA Intervention Regime Pilots	Kent	0	2.2	23.01	6		South	0	0	0	1	1380	374	0.4	9.63	6	0	1			9	0	0	1.26168	0	0	5.66978	0	0	0	6
JSA Intervention Regime Pilots	Leicestershire, Rutland and Northamptonshire	0	2.5	17.47	27		Midlands	0	1	0	0	706	490	0.1	9.88	8	0	1			14	0	0	2.51518	0	0	4.81174	0	0	0	27
JSA Intervention Regime Pilots	London (Brent, Harrow and Hillingdon)	0	3.5	13.03	40		London	0	0	1	0	900	21	4.3	4.681	7	0	1			39	0	0	2.62551	0	0	7.93207	0	0	0	40
JSA Intervention Regime Pilots	London (Central)	0	3.6	13.57	37		London	0	0	1	0	1879	7	26.8	5.527	8	0	1			29	0	0	3.56432	0	0	9.81907	0	0	0	37
JSA Intervention Regime Pilots	London (City and East)	0	7.3	15.28	35		London	0	0	1	0	1179	8	14.7	4.534	12	0	1			43	0	0	2.74151	0	0	23.7583	0	0	0	35
JSA Intervention Regime Pilots	London (Lambeth, Southwark and Wandsworth)	0	4.3	13.42	39		London	0	0	1	0	1354	9	15	5.698	8	0	1			29	0	0	4.48403	0	0	14.0347	0	0	0	39
JSA Intervention Regime Pilots	London (North East)	1	3.8	16.72	30		London	0	0	1	0	834	24	3.5	5.397	6	0	1			31	0	0	3.81323	0	0	7.99333	0	0	0	30
JSA Intervention Regime Pilots	London (North)	0	4.5	14.96	36		London	0	0	1	0	1687	20	8.4	5.391	7	0	1			31	0	0	5.76145	0	0	15.4183	0	0	0	36
JSA Intervention Regime Pilots	London (South East)	1	3.8	22.27	9		London	0	0	1	0	1119	14	8	4.467	10	0	1			26	0	0	3.98702	0	0	14.1639	0	0	0	9
JSA Intervention Regime Pilots	London (South)	0	2	16.86	29		London	0	0	1	0	1748	41	4.3	8.583	7	0	1			23	0	0	4.71513	0	0	6.48841	0	0	0	29
JSA Intervention Regime Pilots	London (West)	0	3.3	18.3	25		London	0	0	1	0	781	13	6	4.73	5	0	1			34	0	0	3.64693	0	0	22.2896	0	0	0	25
JSA Intervention Regime Pilots	Manchester (Central)	0	4	19.47	21		North	1	0	0	0	1084	32	3.4	5.512	11	0	1			18	0	0	2.39478	0	0	9.082	0	0	0	21
JSA Intervention Regime Pilots	Manchester (East and West)	0	3.1	23.31	5		North	1	0	0	0	1458	96	1.5	10.233	9	0	1			11	0	0	3.41933	0	0	6.24059	0	0	0	5
JSA Intervention Regime Pilots	Marches	1	2	22.8	8		Midlands	0	1	0	0	1297	741	0.2	7.062	8	0	1			6	0	0	2.18918	0	0	15.6938	0	0	0	8
JSA Intervention Regime Pilots	Merseyside	0	5.5	15.66	34		North	1	0	0	0	1000	64	1.6	8.258	12	0	1			6	0	0	1.61298	0	0	4.73965	0	0	0	34
JSA Intervention Regime Pilots	Norfolk	0	2.3	16.5	31		South	0	0	0	1	1061	537	0.2	4.791	3	0	1			7	0	0	0.30683	0	0	11.2169	0	0	0	31
JSA Intervention Regime Pilots	North East Yorkshire and the Humber	0	2.8	20.27	17		North	1	0	0	0	833	1183	0.1	10.006	4	0	1			7	0	0	2.29562	0	0	2.78133	0	0	0	17
JSA Intervention Regime Pilots	Northumbria	0	3.1	19.83	19		North	1	0	0	0	1944	542	0.4	6.841	16	0	1			7	0	0	2.70136	0	0	11.0072	0	0	0	19
JSA Intervention Regime Pilots	Nottinghamshire and Lincolnshire	0	2.7	20.31	16		Midlands	0	1	0	0	2622	808	0.3	10.397	10	0	1			9	0	0	0.89353	0	0	3.2721	0	0	0	16
JSA Intervention Regime Pilots	South Tyne and Wear Valley	1	4.3	24.65	1		North	1	0	0	0	993	236	0.4	4.802	9	0	1			5	0	0	2.4115	0	0	13.3132	0	0	0	1
JSA Intervention Regime Pilots	South Yorkshire	0	3.5	19.45	22		North	1	0	0	0	1652	155	1.1	7.845	11	0	1			10	0	0	2.07266	0	0	14.3531	0	0	0	22
JSA Intervention Regime Pilots	Staffordshire	1	2.2	24.09	4		Midlands	0	1	0	0	656	271	0.2	6.501	2	0	1			7	0	0	1.66897	0	0	6.38517	0	0	0	4
JSA Intervention Regime Pilots	Surrey and Sussex	0	1.5	15.76	33		South	0	0	0	1	2168	544	0.4	15.376	7	0	1			10	0	0	1.09781	0	0	3.7526	0	0	0	33
JSA Intervention Regime Pilots	Tees Valley	0	4.8	19.02	23		North	1	0	0	0	1226	79	1.6	3.984	7	0	1			6	0	0	4.10392	0	0	18.6145	0	0	0	23
JSA Intervention Regime Pilots	Thames Valley (Berks, Bucks, Oxfs)	1	1.4	16.17	32		South	0	0	0	1	1052	574	0.2	13.476	7	0	1			14	0	0	2.68106	0	0	3.32072	0	0	0	32
JSA Intervention Regime Pilots	West Of England	0	1.7	21.27	11		South	0	0	0	1	1674	133	1.3	6.329	6	0	1			10	0	0	1.83441	0	0	5.71022	0	0	0	11
JSA Intervention Regime Pilots	West Yorkshire	0	3.3	22.11	10		North	1	0	0	0	2180	203	1.1	13.065	15	0	1			16	0	0	1.41906	0	0	2.33295	0	0	0	10
Lone Parent Prototype	Bedfordshire and Hertfordshire	0	2	18.12	7		South	0	0	0	1	1221	288	0.4	10.06	1	0	0			15	0	0	1.55467	1	1.55467	3.32505	0	0	0	0
Lone Parent Prototype	Birmingham and Solihull	0	6.9	11.33	39		Midlands	0	1	0	0	1834	45	4.1	7.242	0	0	0			29	0	0	0.7636	1	0.7636	6.24827	0	0	0	0
Lone Parent Prototype	Black Country	0	5.4	15.3	22		Midlands	0	1	0	0	1636	36	4.5	6.501	1	0	0			19	0	0	5.12844	1	5.12844	4.99923	0	0	0	0
Lone Parent Prototype	Cambridgeshire and Suffolk	0	2	17.45	13		South	0	0	0	1	1639	719	0.2	8.607	1	0	0			11	0	0	1.31637	1	1.31637	4.89601	0	0	0	0
Lone Parent Prototype	Cheshire, Halton and Warrington	0	2.2	17.91	9		North	1	0	0	0	1654	234	0.7	6.067	1	0	0			4	0	0	3.57013	1	3.57013	9.15774	0	0	0	0
Lone Parent Prototype	Coventry and Warwickshire	0	2.9	14.18	29		Midlands	0	1	0	0	734	207	0.4	5.056	1	0	0			14	0	0	1.17089	1	1.17089	7.97666	0	0	0	0
Lone Parent Prototype	Cumbria and Lancashire	0	2.3	17.8	11		North	1	0	0	0	1212	984	0.1	11.59	1	0	0			8	0	0	1.22174	1	1.22174	2.47714	0	0	0	0
Lone Parent Prototype	Derbyshire	0	2.6	18.54	4		Midlands	0	1	0	0	825	262	0.3	5.96	1	0	0			7	0	0	1.04362	1	1.04362	12.0721	0	0	0	0
Lone Parent Prototype	Devon and Cornwall	0	1.7	14.06	30		South	0	0	0	1	684	1027	0.1	9.404	2	0	0			5	0	0	2.47554	1	2.47554	3.83879	0	0	0	0
Lone Parent Prototype	Dorset and Somerset	0	1.3	15.88	20		South	0	0	0	1	841	610	0.1	6.932	0	0	0			6	0	0	2.75534	1	2.75534	6.36757	0	0	0	0
Lone Parent Prototype	Essex	0	2	15.78	21		South	0	0	0	1	879	367	0.2	9.899	0	0	0			10	0	0	1.16173	1	1.16173	3.55793	0	0	0	0
Lone Parent Prototype	Gloucestershire, Wiltshire and Swindon	0	1.5	17	16		South	0	0	0	1	847	614	0.1	7.24	0	0	0			7	0	0	2.09392	1	2.09392	8.88536	0	0	0	0
Lone Parent Prototype	Hampshire and Isle of Wight	0	1.6	16.44	18		South	0	0	0	1	706	415	0.2	11.11	0	0	0			8	0	0	2.75248	1	2.75248	4.12781	0	0	0	0
Lone Parent Prototype	Kent	0	2.2	16.25	19		South	0	0	0	1	1380	374	0.4	9.63	0	0	0			9	0	0	1.26168	1	1.26168	5.66978	0	0	0	0
Lone Parent Prototype	Leicestershire, Rutland and Northamptonshire	0	2.5	18.37	6		Midlands	0	1	0	0	706	490	0.1	9.88	0	0	0			14	0	0	2.51518	1	2.51518	4.81174	0	0	0	0
Lone Parent Prototype	London (Brent, Harrow and Hillingdon)	0	3.5	13.85	32		London	0	0	1	0	900	21	4.3	4.681	0	0	0			39	0	0	2.62551	1	2.62551	7.93207	0	0	0	0
Lone Parent Prototype	London (Central)	1	3.6	11.74	37		London	0	0	1	0	1879	7	26.8	5.527	0	0	0			29	0	0	3.56432	1	3.56432	9.81907	0	0	0	0
Lone Parent Prototype	London (City and East)	0	7.3	14.84	26		London	0	0	1	0	1179	8	14.7	4.534	0	0	0			43	0	0	2.74151	1	2.74151	23.7583	0	0	0	0
Lone Parent Prototype	London (Lambeth, Southwark and Wandsworth)	0	4.3	13.26	33		London	0	0	1	0	1354	9	15	5.698	1	0	0			29	0	0	4.48403	1	4.48403	14.0347	0	0	0	0
Lone Parent Prototype	London (North East)	0	3.8	17.96	8		London	0	0	1	0	834	24	3.5	5.397	0	0	0			31	0	0	3.81323	1	3.81323	7.99333	0	0	0	0
Lone Parent Prototype	London (North)	0	4.5	12.54	35		London	0	0	1	0	1687	20	8.4	5.391	0	0	0			31	0	0	5.76145	1	5.76145	15.4183	0	0	0	0
Lone Parent Prototype	London (South East)	0	3.8	17.13	14		London	0	0	1	0	1119	14	8	4.467	0	0	0			26	0	0	3.98702	1	3.98702	14.1639	0	0	0	0
Lone Parent Prototype	London (South)	0	2	13.89	31		London	0	0	1	0	1748	41	4.3	8.583	0	0	0			23	0	0	4.71513	1	4.71513	6.48841	0	0	0	0
Lone Parent Prototype	London (West)	0	3.3	14.87	25		London	0	0	1	0	781	13	6	4.73	0	0	0			34	0	0	3.64693	1	3.64693	22.2896	0	0	0	0
Lone Parent Prototype	Manchester (Central)	0	4	14.42	28		North	1	0	0	0	1084	32	3.4	5.512	0	0	0			18	0	0	2.39478	1	2.39478	9.082	0	0	0	0
Lone Parent Prototype	Manchester (East and West)	0	3.1	20.9	2		North	1	0	0	0	1458	96	1.5	10.233	0	0	0			11	0	0	3.41933	1	3.41933	6.24059	0	0	0	0
Lone Parent Prototype	Marches	0	2	17.07	15		Midlands	0	1	0	0	1297	741	0.2	7.062	1	0	0			6	0	0	2.18918	1	2.18918	15.6938	0	0	0	0
Lone Parent Prototype	Merseyside	0	5.5	12.27	36		North	1	0	0	0	1000	64	1.6	8.258	2	0	0			6	0	0	1.61298	1	1.61298	4.73965	0	0	0	0
Lone Parent Prototype	Norfolk	0	2.3	14.9	24		South	0	0	0	1	1061	537	0.2	4.791	0	0	0			7	0	0	0.30683	1	0.30683	11.2169	0	0	0	0
Lone Parent Prototype	North East Yorkshire and the Humber	0	2.8	14.58	27		North	1	0	0	0	833	1183	0.1	10.006	0	0	0			7	0	0	2.29562	1	2.29562	2.78133	0	0	0	0
Lone Parent Prototype	Northumbria	0	3.1	10.95	40		North	1	0	0	0	1944	542	0.4	6.841	1	0	0			7	0	0	2.70136	1	2.70136	11.0072	0	0	0	0
Lone Parent Prototype	Nottinghamshire and Lincolnshire	0	2.7	17.91	10		Midlands	0	1	0	0	2622	808	0.3	10.397	0	0	0			9	0	0	0.89353	1	0.89353	3.2721	0	0	0	0
Lone Parent Prototype	South Tyne and Wear Valley	0	4.3	19.01	3		North	1	0	0	0	993	236	0.4	4.802	0	0	0			5	0	0	2.4115	1	2.4115	13.3132	0	0	0	0
Lone Parent Prototype	South Yorkshire	0	3.5	12.56	34		North	1	0	0	0	1652	155	1.1	7.845	2	0	0			10	0	0	2.07266	1	2.07266	14.3531	0	0	0	0
Lone Parent Prototype	Staffordshire	0	2.2	17.69	12		Midlands	0	1	0	0	656	271	0.2	6.501	0	0	0			7	0	0	1.66897	1	1.66897	6.38517	0	0	0	0
Lone Parent Prototype	Surrey and Sussex	0	1.5	16.99	17		South	0	0	0	1	2168	544	0.4	15.376	2	0	0			10	0	0	1.09781	1	1.09781	3.7526	0	0	0	0
Lone Parent Prototype	Tees Valley	0	4.8	11.38	38		North	1	0	0	0	1226	79	1.6	3.984	1	0	0			6	0	0	4.10392	1	4.10392	18.6145	0	0	0	0
Lone Parent Prototype	Thames Valley (Berks, Bucks, Oxfs)	0	1.4	18.49	5		South	0	0	0	1	1052	574	0.2	13.476	0	0	0			14	0	0	2.68106	1	2.68106	3.32072	0	0	0	0
Lone Parent Prototype	West Of England	0	1.7	23.5	1		South	0	0	0	1	1674	133	1.3	6.329	0	0	0			10	0	0	1.83441	1	1.83441	5.71022	0	0	0	0
Lone Parent Prototype	West Yorkshire	0	3.3	15.01	23		North	1	0	0	0	2180	203	1.1	13.065	0	0	0			16	0	0	1.41906	1	1.41906	2.33295	0	0	0	0
Lone Parents Pilot (IWC)	Bedfordshire and Hertfordshire	0	2	18.82	16		South	0	0	0	1	1221	288	0.4	10.06	5	0	1			15	0	0	1.55467	1	1.55467	3.32505	0	0	0	16
Lone Parents Pilot (IWC)	Birmingham and Solihull	0	6.9	13.14	38		Midlands	0	1	0	0	1834	45	4.1	7.242	9	0	1			29	0	0	0.7636	1	0.7636	6.24827	0	0	0	38
Lone Parents Pilot (IWC)	Black Country	1	5.4	18.12	19		Midlands	0	1	0	0	1636	36	4.5	6.501	8	0	1			19	0	0	5.12844	1	5.12844	4.99923	0	0	0	19
Lone Parents Pilot (IWC)	Cambridgeshire and Suffolk	0	2	17.56	23		South	0	0	0	1	1639	719	0.2	8.607	3	0	1			11	0	0	1.31637	1	1.31637	4.89601	0	0	0	23
Lone Parents Pilot (IWC)	Cheshire, Halton and Warrington	0	2.2	21.19	7		North	1	0	0	0	1654	234	0.7	6.067	3	0	1			4	0	0	3.57013	1	3.57013	9.15774	0	0	0	7
Lone Parents Pilot (IWC)	Coventry and Warwickshire	0	2.9	16.55	29		Midlands	0	1	0	0	734	207	0.4	5.056	6	0	1			14	0	0	1.17089	1	1.17089	7.97666	0	0	0	29
Lone Parents Pilot (IWC)	Cumbria and Lancashire	1	2.3	20.97	8		North	1	0	0	0	1212	984	0.1	11.59	8	0	1			8	0	0	1.22174	1	1.22174	2.47714	0	0	0	8
Lone Parents Pilot (IWC)	Derbyshire	0	2.6	18.06	20		Midlands	0	1	0	0	825	262	0.3	5.96	6	0	1			7	0	0	1.04362	1	1.04362	12.0721	0	0	0	20
Lone Parents Pilot (IWC)	Devon and Cornwall	0	1.7	18.68	18		South	0	0	0	1	684	1027	0.1	9.404	10	0	1			5	0	0	2.47554	1	2.47554	3.83879	0	0	0	18
Lone Parents Pilot (IWC)	Dorset and Somerset	0	1.3	20.55	10		South	0	0	0	1	841	610	0.1	6.932	5	0	1			6	0	0	2.75534	1	2.75534	6.36757	0	0	0	10
Lone Parents Pilot (IWC)	Essex	0	2	19.54	13		South	0	0	0	1	879	367	0.2	9.899	6	0	1			10	0	0	1.16173	1	1.16173	3.55793	0	0	0	13
Lone Parents Pilot (IWC)	Gloucestershire, Wiltshire and Swindon	0	1.5	17.86	21		South	0	0	0	1	847	614	0.1	7.24	3	0	1			7	0	0	2.09392	1	2.09392	8.88536	0	0	0	21
Lone Parents Pilot (IWC)	Hampshire and Isle of Wight	0	1.6	21.41	5		South	0	0	0	1	706	415	0.2	11.11	3	0	1			8	0	0	2.75248	1	2.75248	4.12781	0	0	0	5
Lone Parents Pilot (IWC)	Kent	0	2.2	19.52	14		South	0	0	0	1	1380	374	0.4	9.63	4	0	1			9	0	0	1.26168	1	1.26168	5.66978	0	0	0	14
Lone Parents Pilot (IWC)	Leicestershire, Rutland and Northamptonshire	1	2.5	14.01	36		Midlands	0	1	0	0	706	490	0.1	9.88	4	0	1			14	0	0	2.51518	1	2.51518	4.81174	0	0	0	36
Lone Parents Pilot (IWC)	London (Brent, Harrow and Hillingdon)	1	3.5	12.7	39		London	0	0	1	0	900	21	4.3	4.681	4	0	1			39	0	0	2.62551	1	2.62551	7.93207	0	0	0	39
Lone Parents Pilot (IWC)	London (Central)	1	3.6	13.51	37		London	0	0	1	0	1879	7	26.8	5.527	6	0	1			29	0	0	3.56432	1	3.56432	9.81907	0	0	0	37
Lone Parents Pilot (IWC)	London (City and East)	1	7.3	14.28	35		London	0	0	1	0	1179	8	14.7	4.534	9	0	1			43	0	0	2.74151	1	2.74151	23.7583	0	0	0	35
Lone Parents Pilot (IWC)	London (Lambeth, Southwark and Wandsworth)	1	4.3	12.49	40		London	0	0	1	0	1354	9	15	5.698	6	0	1			29	0	0	4.48403	1	4.48403	14.0347	0	0	0	40
Lone Parents Pilot (IWC)	London (North East)	0	3.8	16.61	27		London	0	0	1	0	834	24	3.5	5.397	5	0	1			31	0	0	3.81323	1	3.81323	7.99333	0	0	0	27
Lone Parents Pilot (IWC)	London (North)	1	4.5	14.65	34		London	0	0	1	0	1687	20	8.4	5.391	4	0	1			31	0	0	5.76145	1	5.76145	15.4183	0	0	0	34
Lone Parents Pilot (IWC)	London (South East)	1	3.8	21.8	4		London	0	0	1	0	1119	14	8	4.467	7	0	1			26	0	0	3.98702	1	3.98702	14.1639	0	0	0	4
Lone Parents Pilot (IWC)	London (South)	1	2	15.78	31		London	0	0	1	0	1748	41	4.3	8.583	4	0	1			23	0	0	4.71513	1	4.71513	6.48841	0	0	0	31
Lone Parents Pilot (IWC)	London (West)	1	3.3	17.32	25		London	0	0	1	0	781	13	6	4.73	3	0	1			34	0	0	3.64693	1	3.64693	22.2896	0	0	0	25
Lone Parents Pilot (IWC)	Manchester (Central)	0	4	15.86	30		North	1	0	0	0	1084	32	3.4	5.512	9	0	1			18	0	0	2.39478	1	2.39478	9.082	0	0	0	30
Lone Parents Pilot (IWC)	Manchester (East and West)	0	3.1	20.83	9		North	1	0	0	0	1458	96	1.5	10.233	7	0	1			11	0	0	3.41933	1	3.41933	6.24059	0	0	0	9
Lone Parents Pilot (IWC)	Marches	0	2	21.92	2		Midlands	0	1	0	0	1297	741	0.2	7.062	7	0	1			6	0	0	2.18918	1	2.18918	15.6938	0	0	0	2
Lone Parents Pilot (IWC)	Merseyside	0	5.5	14.75	33		North	1	0	0	0	1000	64	1.6	8.258	9	0	1			6	0	0	1.61298	1	1.61298	4.73965	0	0	0	33
Lone Parents Pilot (IWC)	Norfolk	0	2.3	17.52	24		South	0	0	0	1	1061	537	0.2	4.791	2	0	1			7	0	0	0.30683	1	0.30683	11.2169	0	0	0	24
Lone Parents Pilot (IWC)	North East Yorkshire and the Humber	0	2.8	18.95	15		North	1	0	0	0	833	1183	0.1	10.006	3	0	1			7	0	0	2.29562	1	2.29562	2.78133	0	0	0	15
Lone Parents Pilot (IWC)	Northumbria	0	3.1	17.32	26		North	1	0	0	0	1944	542	0.4	6.841	13	0	1			7	0	0	2.70136	1	2.70136	11.0072	0	0	0	26
Lone Parents Pilot (IWC)	Nottinghamshire and Lincolnshire	0	2.7	19.57	12		Midlands	0	1	0	0	2622	808	0.3	10.397	8	0	1			9	0	0	0.89353	1	0.89353	3.2721	0	0	0	12
Lone Parents Pilot (IWC)	South Tyne and Wear Valley	0	4.3	21.86	3		North	1	0	0	0	993	236	0.4	4.802	8	0	1			5	0	0	2.4115	1	2.4115	13.3132	0	0	0	3
Lone Parents Pilot (IWC)	South Yorkshire	0	3.5	18.72	17		North	1	0	0	0	1652	155	1.1	7.845	10	0	1			10	0	0	2.07266	1	2.07266	14.3531	0	0	0	17
Lone Parents Pilot (IWC)	Staffordshire	1	2.2	23.59	1		Midlands	0	1	0	0	656	271	0.2	6.501	1	0	1			7	0	0	1.66897	1	1.66897	6.38517	0	0	0	1
Lone Parents Pilot (IWC)	Surrey and Sussex	0	1.5	16.56	28		South	0	0	0	1	2168	544	0.4	15.376	5	0	1			10	0	0	1.09781	1	1.09781	3.7526	0	0	0	28
Lone Parents Pilot (IWC)	Tees Valley	0	4.8	17.64	22		North	1	0	0	0	1226	79	1.6	3.984	6	0	1			6	0	0	4.10392	1	4.10392	18.6145	0	0	0	22
Lone Parents Pilot (IWC)	Thames Valley (Berks, Bucks, Oxfs)	0	1.4	15.31	32		South	0	0	0	1	1052	574	0.2	13.476	4	0	1			14	0	0	2.68106	1	2.68106	3.32072	0	0	0	32
Lone Parents Pilot (IWC)	West Of England	0	1.7	21.28	6		South	0	0	0	1	1674	133	1.3	6.329	6	0	1			10	0	0	1.83441	1	1.83441	5.71022	0	0	0	6
Lone Parents Pilot (IWC)	West Yorkshire	1	3.3	20.29	11		North	1	0	0	0	2180	203	1.1	13.065	9	0	1			16	0	0	1.41906	1	1.41906	2.33295	0	0	0	11
ND25+ (1) Pilots	Bedfordshire and Hertfordshire	0	2	18.12	7		South	0	0	0	1	1221	288	0.4	10.06	2	0	1			15	0	0	1.55467	0	0	3.32505	0	0	0	7
ND25+ (1) Pilots	Birmingham and Solihull	1	6.9	11.33	39		Midlands	0	1	0	0	1834	45	4.1	7.242	1	0	1			29	0	0	0.7636	0	0	6.24827	0	0	0	39
ND25+ (1) Pilots	Black Country	0	5.4	15.3	22		Midlands	0	1	0	0	1636	36	4.5	6.501	2	0	1			19	0	0	5.12844	0	0	4.99923	0	0	0	22
ND25+ (1) Pilots	Cambridgeshire and Suffolk	1	2	17.45	13		South	0	0	0	1	1639	719	0.2	8.607	1	0	1			11	0	0	1.31637	0	0	4.89601	0	0	0	13
ND25+ (1) Pilots	Cheshire, Halton and Warrington	0	2.2	17.91	9		North	1	0	0	0	1654	234	0.7	6.067	2	0	1			4	0	0	3.57013	0	0	9.15774	0	0	0	9
ND25+ (1) Pilots	Coventry and Warwickshire	1	2.9	14.18	29		Midlands	0	1	0	0	734	207	0.4	5.056	2	0	1			14	0	0	1.17089	0	0	7.97666	0	0	0	29
ND25+ (1) Pilots	Cumbria and Lancashire	1	2.3	17.8	11		North	1	0	0	0	1212	984	0.1	11.59	2	0	1			8	0	0	1.22174	0	0	2.47714	0	0	0	11
ND25+ (1) Pilots	Derbyshire	0	2.6	18.54	4		Midlands	0	1	0	0	825	262	0.3	5.96	2	0	1			7	0	0	1.04362	0	0	12.0721	0	0	0	4
ND25+ (1) Pilots	Devon and Cornwall	1	1.7	14.06	30		South	0	0	0	1	684	1027	0.1	9.404	4	0	1			5	0	0	2.47554	0	0	3.83879	0	0	0	30
ND25+ (1) Pilots	Dorset and Somerset	0	1.3	15.88	20		South	0	0	0	1	841	610	0.1	6.932	1	0	1			6	0	0	2.75534	0	0	6.36757	0	0	0	20
ND25+ (1) Pilots	Essex	1	2	15.78	21		South	0	0	0	1	879	367	0.2	9.899	1	0	1			10	0	0	1.16173	0	0	3.55793	0	0	0	21
ND25+ (1) Pilots	Gloucestershire, Wiltshire and Swindon	1	1.5	17	16		South	0	0	0	1	847	614	0.1	7.24	2	0	1			7	0	0	2.09392	0	0	8.88536	0	0	0	16
ND25+ (1) Pilots	Hampshire and Isle of Wight	1	1.6	16.44	18		South	0	0	0	1	706	415	0.2	11.11	1	0	1			8	0	0	2.75248	0	0	4.12781	0	0	0	18
ND25+ (1) Pilots	Kent	0	2.2	16.25	19		South	0	0	0	1	1380	374	0.4	9.63	1	0	1			9	0	0	1.26168	0	0	5.66978	0	0	0	19
ND25+ (1) Pilots	Leicestershire, Rutland and Northamptonshire	1	2.5	18.37	6		Midlands	0	1	0	0	706	490	0.1	9.88	2	0	1			14	0	0	2.51518	0	0	4.81174	0	0	0	6
ND25+ (1) Pilots	London (Brent, Harrow and Hillingdon)	0	3.5	13.85	32		London	0	0	1	0	900	21	4.3	4.681	1	0	1			39	0	0	2.62551	0	0	7.93207	0	0	0	32
ND25+ (1) Pilots	London (Central)	1	3.6	11.74	37		London	0	0	1	0	1879	7	26.8	5.527	2	0	1			29	0	0	3.56432	0	0	9.81907	0	0	0	37
ND25+ (1) Pilots	London (City and East)	1	7.3	14.84	26		London	0	0	1	0	1179	8	14.7	4.534	2	0	1			43	0	0	2.74151	0	0	23.7583	0	0	0	26
ND25+ (1) Pilots	London (Lambeth, Southwark and Wandsworth)	0	4.3	13.26	33		London	0	0	1	0	1354	9	15	5.698	2	0	1			29	0	0	4.48403	0	0	14.0347	0	0	0	33
ND25+ (1) Pilots	London (North East)	0	3.8	17.96	8		London	0	0	1	0	834	24	3.5	5.397	1	0	1			31	0	0	3.81323	0	0	7.99333	0	0	0	8
ND25+ (1) Pilots	London (North)	0	4.5	12.54	35		London	0	0	1	0	1687	20	8.4	5.391	1	0	1			31	0	0	5.76145	0	0	15.4183	0	0	0	35
ND25+ (1) Pilots	London (South East)	1	3.8	17.13	14		London	0	0	1	0	1119	14	8	4.467	2	0	1			26	0	0	3.98702	0	0	14.1639	0	0	0	14
ND25+ (1) Pilots	London (South)	0	2	13.89	31		London	0	0	1	0	1748	41	4.3	8.583	1	0	1			23	0	0	4.71513	0	0	6.48841	0	0	0	31
ND25+ (1) Pilots	London (West)	1	3.3	14.87	25		London	0	0	1	0	781	13	6	4.73	1	0	1			34	0	0	3.64693	0	0	22.2896	0	0	0	25
ND25+ (1) Pilots	Manchester (Central)	0	4	14.42	28		North	1	0	0	0	1084	32	3.4	5.512	1	0	1			18	0	0	2.39478	0	0	9.082	0	0	0	28
ND25+ (1) Pilots	Manchester (East and West)	1	3.1	20.9	2		North	1	0	0	0	1458	96	1.5	10.233	3	0	1			11	0	0	3.41933	0	0	6.24059	0	0	0	2
ND25+ (1) Pilots	Marches	1	2	17.07	15		Midlands	0	1	0	0	1297	741	0.2	7.062	3	0	1			6	0	0	2.18918	0	0	15.6938	0	0	0	15
ND25+ (1) Pilots	Merseyside	0	5.5	12.27	36		North	1	0	0	0	1000	64	1.6	8.258	3	0	1			6	0	0	1.61298	0	0	4.73965	0	0	0	36
ND25+ (1) Pilots	Norfolk	0	2.3	14.9	24		South	0	0	0	1	1061	537	0.2	4.791	0	0	1			7	0	0	0.30683	0	0	11.2169	0	0	0	24
ND25+ (1) Pilots	North East Yorkshire and the Humber	1	2.8	14.58	27		North	1	0	0	0	833	1183	0.1	10.006	1	0	1			7	0	0	2.29562	0	0	2.78133	0	0	0	27
ND25+ (1) Pilots	Northumbria	1	3.1	10.95	40		North	1	0	0	0	1944	542	0.4	6.841	4	0	1			7	0	0	2.70136	0	0	11.0072	0	0	0	40
ND25+ (1) Pilots	Nottinghamshire and Lincolnshire	0	2.7	17.91	10		Midlands	0	1	0	0	2622	808	0.3	10.397	1	0	1			9	0	0	0.89353	0	0	3.2721	0	0	0	10
ND25+ (1) Pilots	South Tyne and Wear Valley	0	4.3	19.01	3		North	1	0	0	0	993	236	0.4	4.802	1	0	1			5	0	0	2.4115	0	0	13.3132	0	0	0	3
ND25+ (1) Pilots	South Yorkshire	1	3.5	12.56	34		North	1	0	0	0	1652	155	1.1	7.845	3	0	1			10	0	0	2.07266	0	0	14.3531	0	0	0	34
ND25+ (1) Pilots	Staffordshire	0	2.2	17.69	12		Midlands	0	1	0	0	656	271	0.2	6.501	1	0	1			7	0	0	1.66897	0	0	6.38517	0	0	0	12
ND25+ (1) Pilots	Surrey and Sussex	0	1.5	16.99	17		South	0	0	0	1	2168	544	0.4	15.376	4	0	1			10	0	0	1.09781	0	0	3.7526	0	0	0	17
ND25+ (1) Pilots	Tees Valley	1	4.8	11.38	38		North	1	0	0	0	1226	79	1.6	3.984	2	0	1			6	0	0	4.10392	0	0	18.6145	0	0	0	38
ND25+ (1) Pilots	Thames Valley (Berks, Bucks, Oxfs)	0	1.4	18.49	5		South	0	0	0	1	1052	574	0.2	13.476	1	0	1			14	0	0	2.68106	0	0	3.32072	0	0	0	5
ND25+ (1) Pilots	West Of England	0	1.7	23.5	1		South	0	0	0	1	1674	133	1.3	6.329	2	0	1			10	0	0	1.83441	0	0	5.71022	0	0	0	1
ND25+ (1) Pilots	West Yorkshire	0	3.3	15.01	23		North	1	0	0	0	2180	203	1.1	13.065	1	0	1			16	0	0	1.41906	0	0	2.33295	0	0	0	23
ND25+ (2) GtW	Bedfordshire and Hertfordshire	0	2	18.56	12		South	0	0	0	1	1221	288	0.4	10.06	5	0	1			15	0	0	1.55467	0	0	3.32505	0	0	0	12
ND25+ (2) GtW	Birmingham and Solihull	0	6.9	13.11	39		Midlands	0	1	0	0	1834	45	4.1	7.242	8	0	1			29	0	0	0.7636	0	0	6.24827	0	0	0	39
ND25+ (2) GtW	Black Country	0	5.4	16.57	26		Midlands	0	1	0	0	1636	36	4.5	6.501	8	0	1			19	0	0	5.12844	0	0	4.99923	0	0	0	26
ND25+ (2) GtW	Cambridgeshire and Suffolk	0	2	17.78	17		South	0	0	0	1	1639	719	0.2	8.607	3	0	1			11	0	0	1.31637	0	0	4.89601	0	0	0	17
ND25+ (2) GtW	Cheshire, Halton and Warrington	0	2.2	20.33	6		North	1	0	0	0	1654	234	0.7	6.067	3	0	1			4	0	0	3.57013	0	0	9.15774	0	0	0	6
ND25+ (2) GtW	Coventry and Warwickshire	0	2.9	16.58	24		Midlands	0	1	0	0	734	207	0.4	5.056	6	0	1			14	0	0	1.17089	0	0	7.97666	0	0	0	24
ND25+ (2) GtW	Cumbria and Lancashire	0	2.3	19.87	7		North	1	0	0	0	1212	984	0.1	11.59	7	0	1			8	0	0	1.22174	0	0	2.47714	0	0	0	7
ND25+ (2) GtW	Derbyshire	0	2.6	17.69	20		Midlands	0	1	0	0	825	262	0.3	5.96	4	0	1			7	0	0	1.04362	0	0	12.0721	0	0	0	20
ND25+ (2) GtW	Devon and Cornwall	0	1.7	18.69	11		South	0	0	0	1	684	1027	0.1	9.404	9	0	1			5	0	0	2.47554	0	0	3.83879	0	0	0	11
ND25+ (2) GtW	Dorset and Somerset	0	1.3	20.57	4		South	0	0	0	1	841	610	0.1	6.932	3	0	1			6	0	0	2.75534	0	0	6.36757	0	0	0	4
ND25+ (2) GtW	Essex	0	2	19.22	10		South	0	0	0	1	879	367	0.2	9.899	5	0	1			10	0	0	1.16173	0	0	3.55793	0	0	0	10
ND25+ (2) GtW	Gloucestershire, Wiltshire and Swindon	0	1.5	16.55	27		South	0	0	0	1	847	614	0.1	7.24	2	0	1			7	0	0	2.09392	0	0	8.88536	0	0	0	27
ND25+ (2) GtW	Hampshire and Isle of Wight	0	1.6	20.82	3		South	0	0	0	1	706	415	0.2	11.11	3	0	1			8	0	0	2.75248	0	0	4.12781	0	0	0	3
ND25+ (2) GtW	Kent	0	2.2	17.8	16		South	0	0	0	1	1380	374	0.4	9.63	3	0	1			9	0	0	1.26168	0	0	5.66978	0	0	0	16
ND25+ (2) GtW	Leicestershire, Rutland and Northamptonshire	0	2.5	17.41	22		Midlands	0	1	0	0	706	490	0.1	9.88	4	0	1			14	0	0	2.51518	0	0	4.81174	0	0	0	22
ND25+ (2) GtW	London (Brent, Harrow and Hillingdon)	1	3.5	13.33	37		London	0	0	1	0	900	21	4.3	4.681	3	0	1			39	0	0	2.62551	0	0	7.93207	0	0	0	37
ND25+ (2) GtW	London (Central)	1	3.6	13.16	38		London	0	0	1	0	1879	7	26.8	5.527	5	0	1			29	0	0	3.56432	0	0	9.81907	0	0	0	38
ND25+ (2) GtW	London (City and East)	1	7.3	15.29	32		London	0	0	1	0	1179	8	14.7	4.534	7	0	1			43	0	0	2.74151	0	0	23.7583	0	0	0	32
ND25+ (2) GtW	London (Lambeth, Southwark and Wandsworth)	1	4.3	12.32	40		London	0	0	1	0	1354	9	15	5.698	5	0	1			29	0	0	4.48403	0	0	14.0347	0	0	0	40
ND25+ (2) GtW	London (North East)	1	3.8	16.23	28		London	0	0	1	0	834	24	3.5	5.397	4	0	1			31	0	0	3.81323	0	0	7.99333	0	0	0	28
ND25+ (2) GtW	London (North)	1	4.5	14.38	35		London	0	0	1	0	1687	20	8.4	5.391	3	0	1			31	0	0	5.76145	0	0	15.4183	0	0	0	35
ND25+ (2) GtW	London (South East)	1	3.8	20.49	5		London	0	0	1	0	1119	14	8	4.467	6	0	1			26	0	0	3.98702	0	0	14.1639	0	0	0	5
ND25+ (2) GtW	London (South)	1	2	14.84	34		London	0	0	1	0	1748	41	4.3	8.583	3	0	1			23	0	0	4.71513	0	0	6.48841	0	0	0	34
ND25+ (2) GtW	London (West)	1	3.3	15.68	30		London	0	0	1	0	781	13	6	4.73	2	0	1			34	0	0	3.64693	0	0	22.2896	0	0	0	30
ND25+ (2) GtW	Manchester (Central)	1	4	15.06	33		North	1	0	0	0	1084	32	3.4	5.512	7	0	1			18	0	0	2.39478	0	0	9.082	0	0	0	33
ND25+ (2) GtW	Manchester (East and West)	1	3.1	19.54	9		North	1	0	0	0	1458	96	1.5	10.233	7	0	1			11	0	0	3.41933	0	0	6.24059	0	0	0	9
ND25+ (2) GtW	Marches	0	2	21.13	1		Midlands	0	1	0	0	1297	741	0.2	7.062	7	0	1			6	0	0	2.18918	0	0	15.6938	0	0	0	1
ND25+ (2) GtW	Merseyside	0	5.5	14.37	36		North	1	0	0	0	1000	64	1.6	8.258	9	0	1			6	0	0	1.61298	0	0	4.73965	0	0	0	36
ND25+ (2) GtW	Norfolk	0	2.3	17.77	18		South	0	0	0	1	1061	537	0.2	4.791	2	0	1			7	0	0	0.30683	0	0	11.2169	0	0	0	18
ND25+ (2) GtW	North East Yorkshire and the Humber	0	2.8	17.9	15		North	1	0	0	0	833	1183	0.1	10.006	3	0	1			7	0	0	2.29562	0	0	2.78133	0	0	0	15
ND25+ (2) GtW	Northumbria	0	3.1	15.31	31		North	1	0	0	0	1944	542	0.4	6.841	10	0	1			7	0	0	2.70136	0	0	11.0072	0	0	0	31
ND25+ (2) GtW	Nottinghamshire and Lincolnshire	0	2.7	18.26	14		Midlands	0	1	0	0	2622	808	0.3	10.397	8	0	1			9	0	0	0.89353	0	0	3.2721	0	0	0	14
ND25+ (2) GtW	South Tyne and Wear Valley	0	4.3	17.66	21		North	1	0	0	0	993	236	0.4	4.802	8	0	1			5	0	0	2.4115	0	0	13.3132	0	0	0	21
ND25+ (2) GtW	South Yorkshire	0	3.5	17.72	19		North	1	0	0	0	1652	155	1.1	7.845	9	0	1			10	0	0	2.07266	0	0	14.3531	0	0	0	19
ND25+ (2) GtW	Staffordshire	0	2.2	20.86	2		Midlands	0	1	0	0	656	271	0.2	6.501	1	0	1			7	0	0	1.66897	0	0	6.38517	0	0	0	2
ND25+ (2) GtW	Surrey and Sussex	0	1.5	16.58	25		South	0	0	0	1	2168	544	0.4	15.376	5	0	1			10	0	0	1.09781	0	0	3.7526	0	0	0	25
ND25+ (2) GtW	Tees Valley	0	4.8	16.66	23		North	1	0	0	0	1226	79	1.6	3.984	5	0	1			6	0	0	4.10392	0	0	18.6145	0	0	0	23
ND25+ (2) GtW	Thames Valley (Berks, Bucks, Oxfs)	0	1.4	16.03	29		South	0	0	0	1	1052	574	0.2	13.476	4	0	1			14	0	0	2.68106	0	0	3.32072	0	0	0	29
ND25+ (2) GtW	West Of England	0	1.7	19.76	8		South	0	0	0	1	1674	133	1.3	6.329	6	0	1			10	0	0	1.83441	0	0	5.71022	0	0	0	8
ND25+ (2) GtW	West Yorkshire	0	3.3	18.49	13		North	1	0	0	0	2180	203	1.1	13.065	9	0	1			16	0	0	1.41906	0	0	2.33295	0	0	0	13
ND50+ (1) Pathfinder	Bedfordshire and Hertfordshire	0	2	15.25	8		South	0	0	0	1	1221	288	0.4	10.06	3	1	1			15	0	0	1.55467	0	0	3.32505	1	3.32505	8	8
ND50+ (1) Pathfinder	Birmingham and Solihull	0	6.9	9.7	39		Midlands	0	1	0	0	1834	45	4.1	7.242	3	1	1			29	0	0	0.7636	0	0	6.24827	1	6.24827	39	39
ND50+ (1) Pathfinder	Black Country	1	5.4	13.68	21		Midlands	0	1	0	0	1636	36	4.5	6.501	2	1	1			19	0	0	5.12844	0	0	4.99923	1	4.99923	21	21
ND50+ (1) Pathfinder	Cambridgeshire and Suffolk	0	2	14.25	16		South	0	0	0	1	1639	719	0.2	8.607	3	1	1			11	0	0	1.31637	0	0	4.89601	1	4.89601	16	16
ND50+ (1) Pathfinder	Cheshire, Halton and Warrington	0	2.2	15.96	4		North	1	0	0	0	1654	234	0.7	6.067	3	1	1			4	0	0	3.57013	0	0	9.15774	1	9.15774	4	4
ND50+ (1) Pathfinder	Coventry and Warwickshire	0	2.9	12.26	31		Midlands	0	1	0	0	734	207	0.4	5.056	4	1	1			14	0	0	1.17089	0	0	7.97666	1	7.97666	31	31
ND50+ (1) Pathfinder	Cumbria and Lancashire	0	2.3	15.38	7		North	1	0	0	0	1212	984	0.1	11.59	3	1	1			8	0	0	1.22174	0	0	2.47714	1	2.47714	7	7
ND50+ (1) Pathfinder	Derbyshire	1	2.6	14.61	13		Midlands	0	1	0	0	825	262	0.3	5.96	2	1	1			7	0	0	1.04362	0	0	12.0721	1	12.0721	13	13
ND50+ (1) Pathfinder	Devon and Cornwall	0	1.7	13.82	20		South	0	0	0	1	684	1027	0.1	9.404	6	1	1			5	0	0	2.47554	0	0	3.83879	1	3.83879	20	20
ND50+ (1) Pathfinder	Dorset and Somerset	1	1.3	13.63	22		South	0	0	0	1	841	610	0.1	6.932	2	1	1			6	0	0	2.75534	0	0	6.36757	1	6.36757	22	22
ND50+ (1) Pathfinder	Essex	0	2	13.47	24		South	0	0	0	1	879	367	0.2	9.899	3	1	1			10	0	0	1.16173	0	0	3.55793	1	3.55793	24	24
ND50+ (1) Pathfinder	Gloucestershire, Wiltshire and Swindon	0	1.5	14.82	12		South	0	0	0	1	847	614	0.1	7.24	2	1	1			7	0	0	2.09392	0	0	8.88536	1	8.88536	12	12
ND50+ (1) Pathfinder	Hampshire and Isle of Wight	0	1.6	14.38	14		South	0	0	0	1	706	415	0.2	11.11	2	1	1			8	0	0	2.75248	0	0	4.12781	1	4.12781	14	14
ND50+ (1) Pathfinder	Kent	0	2.2	13.6	23		South	0	0	0	1	1380	374	0.4	9.63	1	1	1			9	0	0	1.26168	0	0	5.66978	1	5.66978	23	23
ND50+ (1) Pathfinder	Leicestershire, Rutland and Northamptonshire	0	2.5	15.62	6		Midlands	0	1	0	0	706	490	0.1	9.88	3	1	1			14	0	0	2.51518	0	0	4.81174	1	4.81174	6	6
ND50+ (1) Pathfinder	London (Brent, Harrow and Hillingdon)	0	3.5	12.05	33		London	0	0	1	0	900	21	4.3	4.681	1	1	1			39	0	0	2.62551	0	0	7.93207	1	7.93207	33	33
ND50+ (1) Pathfinder	London (Central)	0	3.6	9.38	40		London	0	0	1	0	1879	7	26.8	5.527	3	1	1			29	0	0	3.56432	0	0	9.81907	1	9.81907	40	40
ND50+ (1) Pathfinder	London (City and East)	0	7.3	12.26	32		London	0	0	1	0	1179	8	14.7	4.534	5	1	1			43	0	0	2.74151	0	0	23.7583	1	23.7583	32	32
ND50+ (1) Pathfinder	London (Lambeth, Southwark and Wandsworth)	0	4.3	11.19	35		London	0	0	1	0	1354	9	15	5.698	2	1	1			29	0	0	4.48403	0	0	14.0347	1	14.0347	35	35
ND50+ (1) Pathfinder	London (North East)	0	3.8	14.38	15		London	0	0	1	0	834	24	3.5	5.397	3	1	1			31	0	0	3.81323	0	0	7.99333	1	7.99333	15	15
ND50+ (1) Pathfinder	London (North)	0	4.5	10.07	38		London	0	0	1	0	1687	20	8.4	5.391	1	1	1			31	0	0	5.76145	0	0	15.4183	1	15.4183	38	38
ND50+ (1) Pathfinder	London (South East)	0	3.8	15.03	11		London	0	0	1	0	1119	14	8	4.467	3	1	1			26	0	0	3.98702	0	0	14.1639	1	14.1639	11	11
ND50+ (1) Pathfinder	London (South)	0	2	12.6	29		London	0	0	1	0	1748	41	4.3	8.583	2	1	1			23	0	0	4.71513	0	0	6.48841	1	6.48841	29	29
ND50+ (1) Pathfinder	London (West)	0	3.3	12.4	30		London	0	0	1	0	781	13	6	4.73	2	1	1			34	0	0	3.64693	0	0	22.2896	1	22.2896	30	30
ND50+ (1) Pathfinder	Manchester (Central)	1	4	12.88	28		North	1	0	0	0	1084	32	3.4	5.512	1	1	1			18	0	0	2.39478	0	0	9.082	1	9.082	28	28
ND50+ (1) Pathfinder	Manchester (East and West)	0	3.1	16.94	2		North	1	0	0	0	1458	96	1.5	10.233	4	1	1			11	0	0	3.41933	0	0	6.24059	1	6.24059	2	2
ND50+ (1) Pathfinder	Marches	0	2	15.72	5		Midlands	0	1	0	0	1297	741	0.2	7.062	5	1	1			6	0	0	2.18918	0	0	15.6938	1	15.6938	5	5
ND50+ (1) Pathfinder	Merseyside	0	5.5	11.44	34		North	1	0	0	0	1000	64	1.6	8.258	4	1	1			6	0	0	1.61298	0	0	4.73965	1	4.73965	34	34
ND50+ (1) Pathfinder	Norfolk	0	2.3	13.26	25		South	0	0	0	1	1061	537	0.2	4.791	1	1	1			7	0	0	0.30683	0	0	11.2169	1	11.2169	25	25
ND50+ (1) Pathfinder	North East Yorkshire and the Humber	1	2.8	13.12	26		North	1	0	0	0	833	1183	0.1	10.006	1	1	1			7	0	0	2.29562	0	0	2.78133	1	2.78133	26	26
ND50+ (1) Pathfinder	Northumbria	0	3.1	10.31	37		North	1	0	0	0	1944	542	0.4	6.841	6	1	1			7	0	0	2.70136	0	0	11.0072	1	11.0072	37	37
ND50+ (1) Pathfinder	Nottinghamshire and Lincolnshire	0	2.7	14.05	17		Midlands	0	1	0	0	2622	808	0.3	10.397	5	1	1			9	0	0	0.89353	0	0	3.2721	1	3.2721	17	17
ND50+ (1) Pathfinder	South Tyne and Wear Valley	1	4.3	17.82	1		North	1	0	0	0	993	236	0.4	4.802	3	1	1			5	0	0	2.4115	0	0	13.3132	1	13.3132	1	1
ND50+ (1) Pathfinder	South Yorkshire	0	3.5	12.91	27		North	1	0	0	0	1652	155	1.1	7.845	6	1	1			10	0	0	2.07266	0	0	14.3531	1	14.3531	27	27
ND50+ (1) Pathfinder	Staffordshire	0	2.2	15.23	9		Midlands	0	1	0	0	656	271	0.2	6.501	1	1	1			7	0	0	1.66897	0	0	6.38517	1	6.38517	9	9
ND50+ (1) Pathfinder	Surrey and Sussex	0	1.5	13.98	18		South	0	0	0	1	2168	544	0.4	15.376	4	1	1			10	0	0	1.09781	0	0	3.7526	1	3.7526	18	18
ND50+ (1) Pathfinder	Tees Valley	0	4.8	11.13	36		North	1	0	0	0	1226	79	1.6	3.984	4	1	1			6	0	0	4.10392	0	0	18.6145	1	18.6145	36	36
ND50+ (1) Pathfinder	Thames Valley (Berks, Bucks, Oxfs)	1	1.4	15.12	10		South	0	0	0	1	1052	574	0.2	13.476	3	1	1			14	0	0	2.68106	0	0	3.32072	1	3.32072	10	10
ND50+ (1) Pathfinder	West Of England	0	1.7	16.52	3		South	0	0	0	1	1674	133	1.3	6.329	3	1	1			10	0	0	1.83441	0	0	5.71022	1	5.71022	3	3
ND50+ (1) Pathfinder	West Yorkshire	0	3.3	13.86	19		North	1	0	0	0	2180	203	1.1	13.065	3	1	1			16	0	0	1.41906	0	0	2.33295	1	2.33295	19	19
ND50+ (2) Mandatory IAP	Bedfordshire and Hertfordshire	0	2	18.82	16		South	0	0	0	1	1221	288	0.4	10.06	5	0	1			15	0	0	1.55467	0	0	3.32505	1	3.32505	0	16
ND50+ (2) Mandatory IAP	Birmingham and Solihull	0	6.9	13.14	38		Midlands	0	1	0	0	1834	45	4.1	7.242	9	0	1			29	0	0	0.7636	0	0	6.24827	1	6.24827	0	38
ND50+ (2) Mandatory IAP	Black Country	0	5.4	18.12	19		Midlands	0	1	0	0	1636	36	4.5	6.501	8	0	1			19	0	0	5.12844	0	0	4.99923	1	4.99923	0	19
ND50+ (2) Mandatory IAP	Cambridgeshire and Suffolk	1	2	17.56	23		South	0	0	0	1	1639	719	0.2	8.607	3	0	1			11	0	0	1.31637	0	0	4.89601	1	4.89601	0	23
ND50+ (2) Mandatory IAP	Cheshire, Halton and Warrington	0	2.2	21.19	7		North	1	0	0	0	1654	234	0.7	6.067	3	0	1			4	0	0	3.57013	0	0	9.15774	1	9.15774	0	7
ND50+ (2) Mandatory IAP	Coventry and Warwickshire	1	2.9	16.55	29		Midlands	0	1	0	0	734	207	0.4	5.056	6	0	1			14	0	0	1.17089	0	0	7.97666	1	7.97666	0	29
ND50+ (2) Mandatory IAP	Cumbria and Lancashire	1	2.3	20.97	8		North	1	0	0	0	1212	984	0.1	11.59	8	0	1			8	0	0	1.22174	0	0	2.47714	1	2.47714	0	8
ND50+ (2) Mandatory IAP	Derbyshire	1	2.6	18.06	20		Midlands	0	1	0	0	825	262	0.3	5.96	6	0	1			7	0	0	1.04362	0	0	12.0721	1	12.0721	0	20
ND50+ (2) Mandatory IAP	Devon and Cornwall	0	1.7	18.68	18		South	0	0	0	1	684	1027	0.1	9.404	10	0	1			5	0	0	2.47554	0	0	3.83879	1	3.83879	0	18
ND50+ (2) Mandatory IAP	Dorset and Somerset	0	1.3	20.55	10		South	0	0	0	1	841	610	0.1	6.932	5	0	1			6	0	0	2.75534	0	0	6.36757	1	6.36757	0	10
ND50+ (2) Mandatory IAP	Essex	1	2	19.54	13		South	0	0	0	1	879	367	0.2	9.899	6	0	1			10	0	0	1.16173	0	0	3.55793	1	3.55793	0	13
ND50+ (2) Mandatory IAP	Gloucestershire, Wiltshire and Swindon	0	1.5	17.86	21		South	0	0	0	1	847	614	0.1	7.24	3	0	1			7	0	0	2.09392	0	0	8.88536	1	8.88536	0	21
ND50+ (2) Mandatory IAP	Hampshire and Isle of Wight	1	1.6	21.41	5		South	0	0	0	1	706	415	0.2	11.11	3	0	1			8	0	0	2.75248	0	0	4.12781	1	4.12781	0	5
ND50+ (2) Mandatory IAP	Kent	0	2.2	19.52	14		South	0	0	0	1	1380	374	0.4	9.63	4	0	1			9	0	0	1.26168	0	0	5.66978	1	5.66978	0	14
ND50+ (2) Mandatory IAP	Leicestershire, Rutland and Northamptonshire	1	2.5	14.01	36		Midlands	0	1	0	0	706	490	0.1	9.88	4	0	1			14	0	0	2.51518	0	0	4.81174	1	4.81174	0	36
ND50+ (2) Mandatory IAP	London (Brent, Harrow and Hillingdon)	0	3.5	12.7	39		London	0	0	1	0	900	21	4.3	4.681	4	0	1			39	0	0	2.62551	0	0	7.93207	1	7.93207	0	39
ND50+ (2) Mandatory IAP	London (Central)	0	3.6	13.51	37		London	0	0	1	0	1879	7	26.8	5.527	6	0	1			29	0	0	3.56432	0	0	9.81907	1	9.81907	0	37
ND50+ (2) Mandatory IAP	London (City and East)	0	7.3	14.28	35		London	0	0	1	0	1179	8	14.7	4.534	9	0	1			43	0	0	2.74151	0	0	23.7583	1	23.7583	0	35
ND50+ (2) Mandatory IAP	London (Lambeth, Southwark and Wandsworth)	0	4.3	12.49	40		London	0	0	1	0	1354	9	15	5.698	6	0	1			29	0	0	4.48403	0	0	14.0347	1	14.0347	0	40
ND50+ (2) Mandatory IAP	London (North East)	0	3.8	16.61	27		London	0	0	1	0	834	24	3.5	5.397	5	0	1			31	0	0	3.81323	0	0	7.99333	1	7.99333	0	27
ND50+ (2) Mandatory IAP	London (North)	0	4.5	14.65	34		London	0	0	1	0	1687	20	8.4	5.391	4	0	1			31	0	0	5.76145	0	0	15.4183	1	15.4183	0	34
ND50+ (2) Mandatory IAP	London (South East)	0	3.8	21.8	4		London	0	0	1	0	1119	14	8	4.467	7	0	1			26	0	0	3.98702	0	0	14.1639	1	14.1639	0	4
ND50+ (2) Mandatory IAP	London (South)	0	2	15.78	31		London	0	0	1	0	1748	41	4.3	8.583	4	0	1			23	0	0	4.71513	0	0	6.48841	1	6.48841	0	31
ND50+ (2) Mandatory IAP	London (West)	0	3.3	17.32	25		London	0	0	1	0	781	13	6	4.73	3	0	1			34	0	0	3.64693	0	0	22.2896	1	22.2896	0	25
ND50+ (2) Mandatory IAP	Manchester (Central)	0	4	15.86	30		North	1	0	0	0	1084	32	3.4	5.512	9	0	1			18	0	0	2.39478	0	0	9.082	1	9.082	0	30
ND50+ (2) Mandatory IAP	Manchester (East and West)	0	3.1	20.83	9		North	1	0	0	0	1458	96	1.5	10.233	7	0	1			11	0	0	3.41933	0	0	6.24059	1	6.24059	0	9
ND50+ (2) Mandatory IAP	Marches	1	2	21.92	2		Midlands	0	1	0	0	1297	741	0.2	7.062	7	0	1			6	0	0	2.18918	0	0	15.6938	1	15.6938	0	2
ND50+ (2) Mandatory IAP	Merseyside	0	5.5	14.75	33		North	1	0	0	0	1000	64	1.6	8.258	9	0	1			6	0	0	1.61298	0	0	4.73965	1	4.73965	0	33
ND50+ (2) Mandatory IAP	Norfolk	0	2.3	17.52	24		South	0	0	0	1	1061	537	0.2	4.791	2	0	1			7	0	0	0.30683	0	0	11.2169	1	11.2169	0	24
ND50+ (2) Mandatory IAP	North East Yorkshire and the Humber	0	2.8	18.95	15		North	1	0	0	0	833	1183	0.1	10.006	3	0	1			7	0	0	2.29562	0	0	2.78133	1	2.78133	0	15
ND50+ (2) Mandatory IAP	Northumbria	0	3.1	17.32	26		North	1	0	0	0	1944	542	0.4	6.841	13	0	1			7	0	0	2.70136	0	0	11.0072	1	11.0072	0	26
ND50+ (2) Mandatory IAP	Nottinghamshire and Lincolnshire	0	2.7	19.57	12		Midlands	0	1	0	0	2622	808	0.3	10.397	8	0	1			9	0	0	0.89353	0	0	3.2721	1	3.2721	0	12
ND50+ (2) Mandatory IAP	South Tyne and Wear Valley	1	4.3	21.86	3		North	1	0	0	0	993	236	0.4	4.802	8	0	1			5	0	0	2.4115	0	0	13.3132	1	13.3132	0	3
ND50+ (2) Mandatory IAP	South Yorkshire	0	3.5	18.72	17		North	1	0	0	0	1652	155	1.1	7.845	10	0	1			10	0	0	2.07266	0	0	14.3531	1	14.3531	0	17
ND50+ (2) Mandatory IAP	Staffordshire	0	2.2	23.59	1		Midlands	0	1	0	0	656	271	0.2	6.501	1	0	1			7	0	0	1.66897	0	0	6.38517	1	6.38517	0	1
ND50+ (2) Mandatory IAP	Surrey and Sussex	0	1.5	16.56	28		South	0	0	0	1	2168	544	0.4	15.376	5	0	1			10	0	0	1.09781	0	0	3.7526	1	3.7526	0	28
ND50+ (2) Mandatory IAP	Tees Valley	0	4.8	17.64	22		North	1	0	0	0	1226	79	1.6	3.984	6	0	1			6	0	0	4.10392	0	0	18.6145	1	18.6145	0	22
ND50+ (2) Mandatory IAP	Thames Valley (Berks, Bucks, Oxfs)	1	1.4	15.31	32		South	0	0	0	1	1052	574	0.2	13.476	4	0	1			14	0	0	2.68106	0	0	3.32072	1	3.32072	0	32
ND50+ (2) Mandatory IAP	West Of England	1	1.7	21.28	6		South	0	0	0	1	1674	133	1.3	6.329	6	0	1			10	0	0	1.83441	0	0	5.71022	1	5.71022	0	6
ND50+ (2) Mandatory IAP	West Yorkshire	1	3.3	20.29	11		North	1	0	0	0	2180	203	1.1	13.065	9	0	1			16	0	0	1.41906	0	0	2.33295	1	2.33295	0	11
ND50+ (3) Outreach	Bedfordshire and Hertfordshire	0	2	18.82	16		South	0	0	0	1	1221	288	0.4	10.06	5	0	1			15	0	0	1.55467	0	0	3.32505	1	3.32505	0	16
ND50+ (3) Outreach	Birmingham and Solihull	0	6.9	13.14	38		Midlands	0	1	0	0	1834	45	4.1	7.242	9	0	1			29	0	0	0.7636	0	0	6.24827	1	6.24827	0	38
ND50+ (3) Outreach	Black Country	1	5.4	18.12	19		Midlands	0	1	0	0	1636	36	4.5	6.501	8	0	1			19	0	0	5.12844	0	0	4.99923	1	4.99923	0	19
ND50+ (3) Outreach	Cambridgeshire and Suffolk	0	2	17.56	23		South	0	0	0	1	1639	719	0.2	8.607	3	0	1			11	0	0	1.31637	0	0	4.89601	1	4.89601	0	23
ND50+ (3) Outreach	Cheshire, Halton and Warrington	0	2.2	21.19	7		North	1	0	0	0	1654	234	0.7	6.067	3	0	1			4	0	0	3.57013	0	0	9.15774	1	9.15774	0	7
ND50+ (3) Outreach	Coventry and Warwickshire	0	2.9	16.55	29		Midlands	0	1	0	0	734	207	0.4	5.056	6	0	1			14	0	0	1.17089	0	0	7.97666	1	7.97666	0	29
ND50+ (3) Outreach	Cumbria and Lancashire	0	2.3	20.97	8		North	1	0	0	0	1212	984	0.1	11.59	8	0	1			8	0	0	1.22174	0	0	2.47714	1	2.47714	0	8
ND50+ (3) Outreach	Derbyshire	0	2.6	18.06	20		Midlands	0	1	0	0	825	262	0.3	5.96	6	0	1			7	0	0	1.04362	0	0	12.0721	1	12.0721	0	20
ND50+ (3) Outreach	Devon and Cornwall	0	1.7	18.68	18		South	0	0	0	1	684	1027	0.1	9.404	10	0	1			5	0	0	2.47554	0	0	3.83879	1	3.83879	0	18
ND50+ (3) Outreach	Dorset and Somerset	0	1.3	20.55	10		South	0	0	0	1	841	610	0.1	6.932	5	0	1			6	0	0	2.75534	0	0	6.36757	1	6.36757	0	10
ND50+ (3) Outreach	Essex	0	2	19.54	13		South	0	0	0	1	879	367	0.2	9.899	6	0	1			10	0	0	1.16173	0	0	3.55793	1	3.55793	0	13
ND50+ (3) Outreach	Gloucestershire, Wiltshire and Swindon	0	1.5	17.86	21		South	0	0	0	1	847	614	0.1	7.24	3	0	1			7	0	0	2.09392	0	0	8.88536	1	8.88536	0	21
ND50+ (3) Outreach	Hampshire and Isle of Wight	0	1.6	21.41	5		South	0	0	0	1	706	415	0.2	11.11	3	0	1			8	0	0	2.75248	0	0	4.12781	1	4.12781	0	5
ND50+ (3) Outreach	Kent	0	2.2	19.52	14		South	0	0	0	1	1380	374	0.4	9.63	4	0	1			9	0	0	1.26168	0	0	5.66978	1	5.66978	0	14
ND50+ (3) Outreach	Leicestershire, Rutland and Northamptonshire	0	2.5	14.01	36		Midlands	0	1	0	0	706	490	0.1	9.88	4	0	1			14	0	0	2.51518	0	0	4.81174	1	4.81174	0	36
ND50+ (3) Outreach	London (Brent, Harrow and Hillingdon)	0	3.5	12.7	39		London	0	0	1	0	900	21	4.3	4.681	4	0	1			39	0	0	2.62551	0	0	7.93207	1	7.93207	0	39
ND50+ (3) Outreach	London (Central)	0	3.6	13.51	37		London	0	0	1	0	1879	7	26.8	5.527	6	0	1			29	0	0	3.56432	0	0	9.81907	1	9.81907	0	37
ND50+ (3) Outreach	London (City and East)	0	7.3	14.28	35		London	0	0	1	0	1179	8	14.7	4.534	9	0	1			43	0	0	2.74151	0	0	23.7583	1	23.7583	0	35
ND50+ (3) Outreach	London (Lambeth, Southwark and Wandsworth)	0	4.3	12.49	40		London	0	0	1	0	1354	9	15	5.698	6	0	1			29	0	0	4.48403	0	0	14.0347	1	14.0347	0	40
ND50+ (3) Outreach	London (North East)	0	3.8	16.61	27		London	0	0	1	0	834	24	3.5	5.397	5	0	1			31	0	0	3.81323	0	0	7.99333	1	7.99333	0	27
ND50+ (3) Outreach	London (North)	0	4.5	14.65	34		London	0	0	1	0	1687	20	8.4	5.391	4	0	1			31	0	0	5.76145	0	0	15.4183	1	15.4183	0	34
ND50+ (3) Outreach	London (South East)	0	3.8	21.8	4		London	0	0	1	0	1119	14	8	4.467	7	0	1			26	0	0	3.98702	0	0	14.1639	1	14.1639	0	4
ND50+ (3) Outreach	London (South)	0	2	15.78	31		London	0	0	1	0	1748	41	4.3	8.583	4	0	1			23	0	0	4.71513	0	0	6.48841	1	6.48841	0	31
ND50+ (3) Outreach	London (West)	0	3.3	17.32	25		London	0	0	1	0	781	13	6	4.73	3	0	1			34	0	0	3.64693	0	0	22.2896	1	22.2896	0	25
ND50+ (3) Outreach	Manchester (Central)	0	4	15.86	30		North	1	0	0	0	1084	32	3.4	5.512	9	0	1			18	0	0	2.39478	0	0	9.082	1	9.082	0	30
ND50+ (3) Outreach	Manchester (East and West)	1	3.1	20.83	9		North	1	0	0	0	1458	96	1.5	10.233	7	0	1			11	0	0	3.41933	0	0	6.24059	1	6.24059	0	9
ND50+ (3) Outreach	Marches	0	2	21.92	2		Midlands	0	1	0	0	1297	741	0.2	7.062	7	0	1			6	0	0	2.18918	0	0	15.6938	1	15.6938	0	2
ND50+ (3) Outreach	Merseyside	1	5.5	14.75	33		North	1	0	0	0	1000	64	1.6	8.258	9	0	1			6	0	0	1.61298	0	0	4.73965	1	4.73965	0	33
ND50+ (3) Outreach	Norfolk	0	2.3	17.52	24		South	0	0	0	1	1061	537	0.2	4.791	2	0	1			7	0	0	0.30683	0	0	11.2169	1	11.2169	0	24
ND50+ (3) Outreach	North East Yorkshire and the Humber	0	2.8	18.95	15		North	1	0	0	0	833	1183	0.1	10.006	3	0	1			7	0	0	2.29562	0	0	2.78133	1	2.78133	0	15
ND50+ (3) Outreach	Northumbria	1	3.1	17.32	26		North	1	0	0	0	1944	542	0.4	6.841	13	0	1			7	0	0	2.70136	0	0	11.0072	1	11.0072	0	26
ND50+ (3) Outreach	Nottinghamshire and Lincolnshire	0	2.7	19.57	12		Midlands	0	1	0	0	2622	808	0.3	10.397	8	0	1			9	0	0	0.89353	0	0	3.2721	1	3.2721	0	12
ND50+ (3) Outreach	South Tyne and Wear Valley	0	4.3	21.86	3		North	1	0	0	0	993	236	0.4	4.802	8	0	1			5	0	0	2.4115	0	0	13.3132	1	13.3132	0	3
ND50+ (3) Outreach	South Yorkshire	0	3.5	18.72	17		North	1	0	0	0	1652	155	1.1	7.845	10	0	1			10	0	0	2.07266	0	0	14.3531	1	14.3531	0	17
ND50+ (3) Outreach	Staffordshire	0	2.2	23.59	1		Midlands	0	1	0	0	656	271	0.2	6.501	1	0	1			7	0	0	1.66897	0	0	6.38517	1	6.38517	0	1
ND50+ (3) Outreach	Surrey and Sussex	0	1.5	16.56	28		South	0	0	0	1	2168	544	0.4	15.376	5	0	1			10	0	0	1.09781	0	0	3.7526	1	3.7526	0	28
ND50+ (3) Outreach	Tees Valley	0	4.8	17.64	22		North	1	0	0	0	1226	79	1.6	3.984	6	0	1			6	0	0	4.10392	0	0	18.6145	1	18.6145	0	22
ND50+ (3) Outreach	Thames Valley (Berks, Bucks, Oxfs)	0	1.4	15.31	32		South	0	0	0	1	1052	574	0.2	13.476	4	0	1			14	0	0	2.68106	0	0	3.32072	1	3.32072	0	32
ND50+ (3) Outreach	West Of England	0	1.7	21.28	6		South	0	0	0	1	1674	133	1.3	6.329	6	0	1			10	0	0	1.83441	0	0	5.71022	1	5.71022	0	6
ND50+ (3) Outreach	West Yorkshire	0	3.3	20.29	11		North	1	0	0	0	2180	203	1.1	13.065	9	0	1			16	0	0	1.41906	0	0	2.33295	1	2.33295	0	11
NDDP (1) Pilots	Bedfordshire and Hertfordshire	1	2	18.12	7		South	0	0	0	1	1221	288	0.4	10.06	1	0	1			15	0	0	1.55467	0	0	3.32505	1	3.32505	0	7
NDDP (1) Pilots	Birmingham and Solihull	0	6.9	11.33	39		Midlands	0	1	0	0	1834	45	4.1	7.242	0	0	1			29	0	0	0.7636	0	0	6.24827	1	6.24827	0	39
NDDP (1) Pilots	Black Country	1	5.4	15.3	22		Midlands	0	1	0	0	1636	36	4.5	6.501	1	0	1			19	0	0	5.12844	0	0	4.99923	1	4.99923	0	22
NDDP (1) Pilots	Cambridgeshire and Suffolk	0	2	17.45	13		South	0	0	0	1	1639	719	0.2	8.607	1	0	1			11	0	0	1.31637	0	0	4.89601	1	4.89601	0	13
NDDP (1) Pilots	Cheshire, Halton and Warrington	0	2.2	17.91	9		North	1	0	0	0	1654	234	0.7	6.067	1	0	1			4	0	0	3.57013	0	0	9.15774	1	9.15774	0	9
NDDP (1) Pilots	Coventry and Warwickshire	0	2.9	14.18	29		Midlands	0	1	0	0	734	207	0.4	5.056	1	0	1			14	0	0	1.17089	0	0	7.97666	1	7.97666	0	29
NDDP (1) Pilots	Cumbria and Lancashire	0	2.3	17.8	11		North	1	0	0	0	1212	984	0.1	11.59	1	0	1			8	0	0	1.22174	0	0	2.47714	1	2.47714	0	11
NDDP (1) Pilots	Derbyshire	0	2.6	18.54	4		Midlands	0	1	0	0	825	262	0.3	5.96	1	0	1			7	0	0	1.04362	0	0	12.0721	1	12.0721	0	4
NDDP (1) Pilots	Devon and Cornwall	1	1.7	14.06	30		South	0	0	0	1	684	1027	0.1	9.404	2	0	1			5	0	0	2.47554	0	0	3.83879	1	3.83879	0	30
NDDP (1) Pilots	Dorset and Somerset	0	1.3	15.88	20		South	0	0	0	1	841	610	0.1	6.932	0	0	1			6	0	0	2.75534	0	0	6.36757	1	6.36757	0	20
NDDP (1) Pilots	Essex	0	2	15.78	21		South	0	0	0	1	879	367	0.2	9.899	0	0	1			10	0	0	1.16173	0	0	3.55793	1	3.55793	0	21
NDDP (1) Pilots	Gloucestershire, Wiltshire and Swindon	0	1.5	17	16		South	0	0	0	1	847	614	0.1	7.24	1	0	1			7	0	0	2.09392	0	0	8.88536	1	8.88536	0	16
NDDP (1) Pilots	Hampshire and Isle of Wight	0	1.6	16.44	18		South	0	0	0	1	706	415	0.2	11.11	0	0	1			8	0	0	2.75248	0	0	4.12781	1	4.12781	0	18
NDDP (1) Pilots	Kent	0	2.2	16.25	19		South	0	0	0	1	1380	374	0.4	9.63	0	0	1			9	0	0	1.26168	0	0	5.66978	1	5.66978	0	19
NDDP (1) Pilots	Leicestershire, Rutland and Northamptonshire	1	2.5	18.37	6		Midlands	0	1	0	0	706	490	0.1	9.88	0	0	1			14	0	0	2.51518	0	0	4.81174	1	4.81174	0	6
NDDP (1) Pilots	London (Brent, Harrow and Hillingdon)	0	3.5	13.85	32		London	0	0	1	0	900	21	4.3	4.681	0	0	1			39	0	0	2.62551	0	0	7.93207	1	7.93207	0	32
NDDP (1) Pilots	London (Central)	0	3.6	11.74	37		London	0	0	1	0	1879	7	26.8	5.527	1	0	1			29	0	0	3.56432	0	0	9.81907	1	9.81907	0	37
NDDP (1) Pilots	London (City and East)	1	7.3	14.84	26		London	0	0	1	0	1179	8	14.7	4.534	0	0	1			43	0	0	2.74151	0	0	23.7583	1	23.7583	0	26
NDDP (1) Pilots	London (Lambeth, Southwark and Wandsworth)	0	4.3	13.26	33		London	0	0	1	0	1354	9	15	5.698	1	0	1			29	0	0	4.48403	0	0	14.0347	1	14.0347	0	33
NDDP (1) Pilots	London (North East)	0	3.8	17.96	8		London	0	0	1	0	834	24	3.5	5.397	0	0	1			31	0	0	3.81323	0	0	7.99333	1	7.99333	0	8
NDDP (1) Pilots	London (North)	0	4.5	12.54	35		London	0	0	1	0	1687	20	8.4	5.391	0	0	1			31	0	0	5.76145	0	0	15.4183	1	15.4183	0	35
NDDP (1) Pilots	London (South East)	0	3.8	17.13	14		London	0	0	1	0	1119	14	8	4.467	1	0	1			26	0	0	3.98702	0	0	14.1639	1	14.1639	0	14
NDDP (1) Pilots	London (South)	0	2	13.89	31		London	0	0	1	0	1748	41	4.3	8.583	0	0	1			23	0	0	4.71513	0	0	6.48841	1	6.48841	0	31
NDDP (1) Pilots	London (West)	0	3.3	14.87	25		London	0	0	1	0	781	13	6	4.73	0	0	1			34	0	0	3.64693	0	0	22.2896	1	22.2896	0	25
NDDP (1) Pilots	Manchester (Central)	0	4	14.42	28		North	1	0	0	0	1084	32	3.4	5.512	0	0	1			18	0	0	2.39478	0	0	9.082	1	9.082	0	28
NDDP (1) Pilots	Manchester (East and West)	1	3.1	20.9	2		North	1	0	0	0	1458	96	1.5	10.233	1	0	1			11	0	0	3.41933	0	0	6.24059	1	6.24059	0	2
NDDP (1) Pilots	Marches	0	2	17.07	15		Midlands	0	1	0	0	1297	741	0.2	7.062	2	0	1			6	0	0	2.18918	0	0	15.6938	1	15.6938	0	15
NDDP (1) Pilots	Merseyside	0	5.5	12.27	36		North	1	0	0	0	1000	64	1.6	8.258	2	0	1			6	0	0	1.61298	0	0	4.73965	1	4.73965	0	36
NDDP (1) Pilots	Norfolk	0	2.3	14.9	24		South	0	0	0	1	1061	537	0.2	4.791	0	0	1			7	0	0	0.30683	0	0	11.2169	1	11.2169	0	24
NDDP (1) Pilots	North East Yorkshire and the Humber	1	2.8	14.58	27		North	1	0	0	0	833	1183	0.1	10.006	0	0	1			7	0	0	2.29562	0	0	2.78133	1	2.78133	0	27
NDDP (1) Pilots	Northumbria	1	3.1	10.95	40		North	1	0	0	0	1944	542	0.4	6.841	2	0	1			7	0	0	2.70136	0	0	11.0072	1	11.0072	0	40
NDDP (1) Pilots	Nottinghamshire and Lincolnshire	0	2.7	17.91	10		Midlands	0	1	0	0	2622	808	0.3	10.397	0	0	1			9	0	0	0.89353	0	0	3.2721	1	3.2721	0	10
NDDP (1) Pilots	South Tyne and Wear Valley	0	4.3	19.01	3		North	1	0	0	0	993	236	0.4	4.802	0	0	1			5	0	0	2.4115	0	0	13.3132	1	13.3132	0	3
NDDP (1) Pilots	South Yorkshire	0	3.5	12.56	34		North	1	0	0	0	1652	155	1.1	7.845	2	0	1			10	0	0	2.07266	0	0	14.3531	1	14.3531	0	34
NDDP (1) Pilots	Staffordshire	0	2.2	17.69	12		Midlands	0	1	0	0	656	271	0.2	6.501	0	0	1			7	0	0	1.66897	0	0	6.38517	1	6.38517	0	12
NDDP (1) Pilots	Surrey and Sussex	1	1.5	16.99	17		South	0	0	0	1	2168	544	0.4	15.376	2	0	1			10	0	0	1.09781	0	0	3.7526	1	3.7526	0	17
NDDP (1) Pilots	Tees Valley	0	4.8	11.38	38		North	1	0	0	0	1226	79	1.6	3.984	1	0	1			6	0	0	4.10392	0	0	18.6145	1	18.6145	0	38
NDDP (1) Pilots	Thames Valley (Berks, Bucks, Oxfs)	0	1.4	18.49	5		South	0	0	0	1	1052	574	0.2	13.476	0	0	1			14	0	0	2.68106	0	0	3.32072	1	3.32072	0	5
NDDP (1) Pilots	West Of England	1	1.7	23.5	1		South	0	0	0	1	1674	133	1.3	6.329	0	0	1			10	0	0	1.83441	0	0	5.71022	1	5.71022	0	1
NDDP (1) Pilots	West Yorkshire	0	3.3	15.01	23		North	1	0	0	0	2180	203	1.1	13.065	0	0	1			16	0	0	1.41906	0	0	2.33295	1	2.33295	0	23
NDDP (2) Innovative Schemes	Bedfordshire and Hertfordshire	0	2				South	0	0	0	1	1221	288	0.4	10.06	1	0	0			15	0	0	1.55467	0	0	3.32505	1	3.32505
NDDP (2) Innovative Schemes	Birmingham and Solihull	1	6.9				Midlands	0	1	0	0	1834	45	4.1	7.242	0	0	0			29	0	0	0.7636	0	0	6.24827	1	6.24827
NDDP (2) Innovative Schemes	Black Country	0	5.4				Midlands	0	1	0	0	1636	36	4.5	6.501	1	0	0			19	0	0	5.12844	0	0	4.99923	1	4.99923
NDDP (2) Innovative Schemes	Cambridgeshire and Suffolk	0	2				South	0	0	0	1	1639	719	0.2	8.607	1	0	0			11	0	0	1.31637	0	0	4.89601	1	4.89601
NDDP (2) Innovative Schemes	Cheshire, Halton and Warrington	1	2.2				North	1	0	0	0	1654	234	0.7	6.067	1	0	0			4	0	0	3.57013	0	0	9.15774	1	9.15774
NDDP (2) Innovative Schemes	Coventry and Warwickshire	1	2.9				Midlands	0	1	0	0	734	207	0.4	5.056	1	0	0			14	0	0	1.17089	0	0	7.97666	1	7.97666
NDDP (2) Innovative Schemes	Cumbria and Lancashire	1	2.3				North	1	0	0	0	1212	984	0.1	11.59	1	0	0			8	0	0	1.22174	0	0	2.47714	1	2.47714
NDDP (2) Innovative Schemes	Derbyshire	1	2.6				Midlands	0	1	0	0	825	262	0.3	5.96	1	0	0			7	0	0	1.04362	0	0	12.0721	1	12.0721
NDDP (2) Innovative Schemes	Devon and Cornwall	1	1.7				South	0	0	0	1	684	1027	0.1	9.404	2	0	0			5	0	0	2.47554	0	0	3.83879	1	3.83879
NDDP (2) Innovative Schemes	Dorset and Somerset	1	1.3				South	0	0	0	1	841	610	0.1	6.932	0	0	0			6	0	0	2.75534	0	0	6.36757	1	6.36757
NDDP (2) Innovative Schemes	Essex	1	2				South	0	0	0	1	879	367	0.2	9.899	0	0	0			10	0	0	1.16173	0	0	3.55793	1	3.55793
NDDP (2) Innovative Schemes	Gloucestershire, Wiltshire and Swindon	1	1.5				South	0	0	0	1	847	614	0.1	7.24	1	0	0			7	0	0	2.09392	0	0	8.88536	1	8.88536
NDDP (2) Innovative Schemes	Hampshire and Isle of Wight	1	1.6				South	0	0	0	1	706	415	0.2	11.11	0	0	0			8	0	0	2.75248	0	0	4.12781	1	4.12781
NDDP (2) Innovative Schemes	Kent	1	2.2				South	0	0	0	1	1380	374	0.4	9.63	0	0	0			9	0	0	1.26168	0	0	5.66978	1	5.66978
NDDP (2) Innovative Schemes	Leicestershire, Rutland and Northamptonshire	1	2.5				Midlands	0	1	0	0	706	490	0.1	9.88	0	0	0			14	0	0	2.51518	0	0	4.81174	1	4.81174
NDDP (2) Innovative Schemes	London (Brent, Harrow and Hillingdon)	1	3.5				London	0	0	1	0	900	21	4.3	4.681	0	0	0			39	0	0	2.62551	0	0	7.93207	1	7.93207
NDDP (2) Innovative Schemes	London (Central)	1	3.6				London	0	0	1	0	1879	7	26.8	5.527	1	0	0			29	0	0	3.56432	0	0	9.81907	1	9.81907
NDDP (2) Innovative Schemes	London (City and East)	1	7.3				London	0	0	1	0	1179	8	14.7	4.534	0	0	0			43	0	0	2.74151	0	0	23.7583	1	23.7583
NDDP (2) Innovative Schemes	London (Lambeth, Southwark and Wandsworth)	1	4.3				London	0	0	1	0	1354	9	15	5.698	1	0	0			29	0	0	4.48403	0	0	14.0347	1	14.0347
NDDP (2) Innovative Schemes	London (North East)	1	3.8				London	0	0	1	0	834	24	3.5	5.397	0	0	0			31	0	0	3.81323	0	0	7.99333	1	7.99333
NDDP (2) Innovative Schemes	London (North)	1	4.5				London	0	0	1	0	1687	20	8.4	5.391	0	0	0			31	0	0	5.76145	0	0	15.4183	1	15.4183
NDDP (2) Innovative Schemes	London (South East)	1	3.8				London	0	0	1	0	1119	14	8	4.467	1	0	0			26	0	0	3.98702	0	0	14.1639	1	14.1639
NDDP (2) Innovative Schemes	London (South)	1	2				London	0	0	1	0	1748	41	4.3	8.583	0	0	0			23	0	0	4.71513	0	0	6.48841	1	6.48841
NDDP (2) Innovative Schemes	London (West)	1	3.3				London	0	0	1	0	781	13	6	4.73	0	0	0			34	0	0	3.64693	0	0	22.2896	1	22.2896
NDDP (2) Innovative Schemes	Manchester (Central)	1	4				North	1	0	0	0	1084	32	3.4	5.512	0	0	0			18	0	0	2.39478	0	0	9.082	1	9.082
NDDP (2) Innovative Schemes	Manchester (East and West)	1	3.1				North	1	0	0	0	1458	96	1.5	10.233	1	0	0			11	0	0	3.41933	0	0	6.24059	1	6.24059
NDDP (2) Innovative Schemes	Marches	1	2				Midlands	0	1	0	0	1297	741	0.2	7.062	2	0	0			6	0	0	2.18918	0	0	15.6938	1	15.6938
NDDP (2) Innovative Schemes	Merseyside	1	5.5				North	1	0	0	0	1000	64	1.6	8.258	2	0	0			6	0	0	1.61298	0	0	4.73965	1	4.73965
NDDP (2) Innovative Schemes	Norfolk	0	2.3				South	0	0	0	1	1061	537	0.2	4.791	0	0	0			7	0	0	0.30683	0	0	11.2169	1	11.2169
NDDP (2) Innovative Schemes	North East Yorkshire and the Humber	0	2.8				North	1	0	0	0	833	1183	0.1	10.006	0	0	0			7	0	0	2.29562	0	0	2.78133	1	2.78133
NDDP (2) Innovative Schemes	Northumbria	1	3.1				North	1	0	0	0	1944	542	0.4	6.841	2	0	0			7	0	0	2.70136	0	0	11.0072	1	11.0072
NDDP (2) Innovative Schemes	Nottinghamshire and Lincolnshire	1	2.7				Midlands	0	1	0	0	2622	808	0.3	10.397	0	0	0			9	0	0	0.89353	0	0	3.2721	1	3.2721
NDDP (2) Innovative Schemes	South Tyne and Wear Valley	1	4.3				North	1	0	0	0	993	236	0.4	4.802	0	0	0			5	0	0	2.4115	0	0	13.3132	1	13.3132
NDDP (2) Innovative Schemes	South Yorkshire	1	3.5				North	1	0	0	0	1652	155	1.1	7.845	2	0	0			10	0	0	2.07266	0	0	14.3531	1	14.3531
NDDP (2) Innovative Schemes	Staffordshire	1	2.2				Midlands	0	1	0	0	656	271	0.2	6.501	0	0	0			7	0	0	1.66897	0	0	6.38517	1	6.38517
NDDP (2) Innovative Schemes	Surrey and Sussex	1	1.5				South	0	0	0	1	2168	544	0.4	15.376	2	0	0			10	0	0	1.09781	0	0	3.7526	1	3.7526
NDDP (2) Innovative Schemes	Tees Valley	1	4.8				North	1	0	0	0	1226	79	1.6	3.984	1	0	0			6	0	0	4.10392	0	0	18.6145	1	18.6145
NDDP (2) Innovative Schemes	Thames Valley (Berks, Bucks, Oxfs)	1	1.4				South	0	0	0	1	1052	574	0.2	13.476	0	0	0			14	0	0	2.68106	0	0	3.32072	1	3.32072
NDDP (2) Innovative Schemes	West Of England	1	1.7				South	0	0	0	1	1674	133	1.3	6.329	0	0	0			10	0	0	1.83441	0	0	5.71022	1	5.71022
NDDP (2) Innovative Schemes	West Yorkshire	1	3.3				North	1	0	0	0	2180	203	1.1	13.065	0	0	0			16	0	0	1.41906	0	0	2.33295	1	2.33295
NDLP (1) Pathfinders	Bedfordshire and Hertfordshire	0	2				South	0	0	0	1	1221	288	0.4	10.06	0	1	1			15	0	0	1.55467	1	1.55467	3.32505	0	0
NDLP (1) Pathfinders	Birmingham and Solihull	0	6.9				Midlands	0	1	0	0	1834	45	4.1	7.242	0	1	1			29	0	0	0.7636	1	0.7636	6.24827	0	0
NDLP (1) Pathfinders	Black Country	0	5.4				Midlands	0	1	0	0	1636	36	4.5	6.501	0	1	1			19	0	0	5.12844	1	5.12844	4.99923	0	0
NDLP (1) Pathfinders	Cambridgeshire and Suffolk	1	2				South	0	0	0	1	1639	719	0.2	8.607	0	1	1			11	0	0	1.31637	1	1.31637	4.89601	0	0
NDLP (1) Pathfinders	Cheshire, Halton and Warrington	1	2.2				North	1	0	0	0	1654	234	0.7	6.067	0	1	1			4	0	0	3.57013	1	3.57013	9.15774	0	0
NDLP (1) Pathfinders	Coventry and Warwickshire	1	2.9				Midlands	0	1	0	0	734	207	0.4	5.056	0	1	1			14	0	0	1.17089	1	1.17089	7.97666	0	0
NDLP (1) Pathfinders	Cumbria and Lancashire	0	2.3				North	1	0	0	0	1212	984	0.1	11.59	0	1	1			8	0	0	1.22174	1	1.22174	2.47714	0	0
NDLP (1) Pathfinders	Derbyshire	0	2.6				Midlands	0	1	0	0	825	262	0.3	5.96	0	1	1			7	0	0	1.04362	1	1.04362	12.0721	0	0
NDLP (1) Pathfinders	Devon and Cornwall	0	1.7				South	0	0	0	1	684	1027	0.1	9.404	0	1	1			5	0	0	2.47554	1	2.47554	3.83879	0	0
NDLP (1) Pathfinders	Dorset and Somerset	0	1.3				South	0	0	0	1	841	610	0.1	6.932	0	1	1			6	0	0	2.75534	1	2.75534	6.36757	0	0
NDLP (1) Pathfinders	Essex	0	2				South	0	0	0	1	879	367	0.2	9.899	0	1	1			10	0	0	1.16173	1	1.16173	3.55793	0	0
NDLP (1) Pathfinders	Gloucestershire, Wiltshire and Swindon	0	1.5				South	0	0	0	1	847	614	0.1	7.24	0	1	1			7	0	0	2.09392	1	2.09392	8.88536	0	0
NDLP (1) Pathfinders	Hampshire and Isle of Wight	0	1.6				South	0	0	0	1	706	415	0.2	11.11	0	1	1			8	0	0	2.75248	1	2.75248	4.12781	0	0
NDLP (1) Pathfinders	Kent	0	2.2				South	0	0	0	1	1380	374	0.4	9.63	0	1	1			9	0	0	1.26168	1	1.26168	5.66978	0	0
NDLP (1) Pathfinders	Leicestershire, Rutland and Northamptonshire	0	2.5				Midlands	0	1	0	0	706	490	0.1	9.88	0	1	1			14	0	0	2.51518	1	2.51518	4.81174	0	0
NDLP (1) Pathfinders	London (Brent, Harrow and Hillingdon)	0	3.5				London	0	0	1	0	900	21	4.3	4.681	0	1	1			39	0	0	2.62551	1	2.62551	7.93207	0	0
NDLP (1) Pathfinders	London (Central)	0	3.6				London	0	0	1	0	1879	7	26.8	5.527	0	1	1			29	0	0	3.56432	1	3.56432	9.81907	0	0
NDLP (1) Pathfinders	London (City and East)	0	7.3				London	0	0	1	0	1179	8	14.7	4.534	0	1	1			43	0	0	2.74151	1	2.74151	23.7583	0	0
NDLP (1) Pathfinders	London (Lambeth, Southwark and Wandsworth)	0	4.3				London	0	0	1	0	1354	9	15	5.698	0	1	1			29	0	0	4.48403	1	4.48403	14.0347	0	0
NDLP (1) Pathfinders	London (North East)	0	3.8				London	0	0	1	0	834	24	3.5	5.397	0	1	1			31	0	0	3.81323	1	3.81323	7.99333	0	0
NDLP (1) Pathfinders	London (North)	0	4.5				London	0	0	1	0	1687	20	8.4	5.391	0	1	1			31	0	0	5.76145	1	5.76145	15.4183	0	0
NDLP (1) Pathfinders	London (South East)	0	3.8				London	0	0	1	0	1119	14	8	4.467	0	1	1			26	0	0	3.98702	1	3.98702	14.1639	0	0
NDLP (1) Pathfinders	London (South)	0	2				London	0	0	1	0	1748	41	4.3	8.583	0	1	1			23	0	0	4.71513	1	4.71513	6.48841	0	0
NDLP (1) Pathfinders	London (West)	0	3.3				London	0	0	1	0	781	13	6	4.73	0	1	1			34	0	0	3.64693	1	3.64693	22.2896	0	0
NDLP (1) Pathfinders	Manchester (Central)	0	4				North	1	0	0	0	1084	32	3.4	5.512	0	1	1			18	0	0	2.39478	1	2.39478	9.082	0	0
NDLP (1) Pathfinders	Manchester (East and West)	0	3.1				North	1	0	0	0	1458	96	1.5	10.233	0	1	1			11	0	0	3.41933	1	3.41933	6.24059	0	0
NDLP (1) Pathfinders	Marches	1	2				Midlands	0	1	0	0	1297	741	0.2	7.062	0	1	1			6	0	0	2.18918	1	2.18918	15.6938	0	0
NDLP (1) Pathfinders	Merseyside	0	5.5				North	1	0	0	0	1000	64	1.6	8.258	0	1	1			6	0	0	1.61298	1	1.61298	4.73965	0	0
NDLP (1) Pathfinders	Norfolk	0	2.3				South	0	0	0	1	1061	537	0.2	4.791	0	1	1			7	0	0	0.30683	1	0.30683	11.2169	0	0
NDLP (1) Pathfinders	North East Yorkshire and the Humber	0	2.8				North	1	0	0	0	833	1183	0.1	10.006	0	1	1			7	0	0	2.29562	1	2.29562	2.78133	0	0
NDLP (1) Pathfinders	Northumbria	0	3.1				North	1	0	0	0	1944	542	0.4	6.841	0	1	1			7	0	0	2.70136	1	2.70136	11.0072	0	0
NDLP (1) Pathfinders	Nottinghamshire and Lincolnshire	0	2.7				Midlands	0	1	0	0	2622	808	0.3	10.397	0	1	1			9	0	0	0.89353	1	0.89353	3.2721	0	0
NDLP (1) Pathfinders	South Tyne and Wear Valley	0	4.3				North	1	0	0	0	993	236	0.4	4.802	0	1	1			5	0	0	2.4115	1	2.4115	13.3132	0	0
NDLP (1) Pathfinders	South Yorkshire	1	3.5				North	1	0	0	0	1652	155	1.1	7.845	0	1	1			10	0	0	2.07266	1	2.07266	14.3531	0	0
NDLP (1) Pathfinders	Staffordshire	0	2.2				Midlands	0	1	0	0	656	271	0.2	6.501	0	1	1			7	0	0	1.66897	1	1.66897	6.38517	0	0
NDLP (1) Pathfinders	Surrey and Sussex	1	1.5				South	0	0	0	1	2168	544	0.4	15.376	0	1	1			10	0	0	1.09781	1	1.09781	3.7526	0	0
NDLP (1) Pathfinders	Tees Valley	0	4.8				North	1	0	0	0	1226	79	1.6	3.984	0	1	1			6	0	0	4.10392	1	4.10392	18.6145	0	0
NDLP (1) Pathfinders	Thames Valley (Berks, Bucks, Oxfs)	0	1.4				South	0	0	0	1	1052	574	0.2	13.476	0	1	1			14	0	0	2.68106	1	2.68106	3.32072	0	0
NDLP (1) Pathfinders	West Of England	0	1.7				South	0	0	0	1	1674	133	1.3	6.329	0	1	1			10	0	0	1.83441	1	1.83441	5.71022	0	0
NDLP (1) Pathfinders	West Yorkshire	0	3.3				North	1	0	0	0	2180	203	1.1	13.065	0	1	1			16	0	0	1.41906	1	1.41906	2.33295	0	0
NDLP (2) Innovative Schemes	Bedfordshire and Hertfordshire	0	2	15.25	8		South	0	0	0	1	1221	288	0.4	10.06	2	0	0			15	0	0	1.55467	1	1.55467	3.32505	0	0	0	0
NDLP (2) Innovative Schemes	Birmingham and Solihull	1	6.9	9.7	39		Midlands	0	1	0	0	1834	45	4.1	7.242	2	0	0			29	0	0	0.7636	1	0.7636	6.24827	0	0	0	0
NDLP (2) Innovative Schemes	Black Country	0	5.4	13.68	21		Midlands	0	1	0	0	1636	36	4.5	6.501	2	0	0			19	0	0	5.12844	1	5.12844	4.99923	0	0	0	0
NDLP (2) Innovative Schemes	Cambridgeshire and Suffolk	0	2	14.25	16		South	0	0	0	1	1639	719	0.2	8.607	2	0	0			11	0	0	1.31637	1	1.31637	4.89601	0	0	0	0
NDLP (2) Innovative Schemes	Cheshire, Halton and Warrington	0	2.2	15.96	4		North	1	0	0	0	1654	234	0.7	6.067	2	0	0			4	0	0	3.57013	1	3.57013	9.15774	0	0	0	0
NDLP (2) Innovative Schemes	Coventry and Warwickshire	0	2.9	12.26	31		Midlands	0	1	0	0	734	207	0.4	5.056	3	0	0			14	0	0	1.17089	1	1.17089	7.97666	0	0	0	0
NDLP (2) Innovative Schemes	Cumbria and Lancashire	0	2.3	15.38	7		North	1	0	0	0	1212	984	0.1	11.59	3	0	0			8	0	0	1.22174	1	1.22174	2.47714	0	0	0	0
NDLP (2) Innovative Schemes	Derbyshire	0	2.6	14.61	13		Midlands	0	1	0	0	825	262	0.3	5.96	2	0	0			7	0	0	1.04362	1	1.04362	12.0721	0	0	0	0
NDLP (2) Innovative Schemes	Devon and Cornwall	0	1.7	13.82	20		South	0	0	0	1	684	1027	0.1	9.404	5	0	0			5	0	0	2.47554	1	2.47554	3.83879	0	0	0	0
NDLP (2) Innovative Schemes	Dorset and Somerset	0	1.3	13.63	22		South	0	0	0	1	841	610	0.1	6.932	1	0	0			6	0	0	2.75534	1	2.75534	6.36757	0	0	0	0
NDLP (2) Innovative Schemes	Essex	0	2	13.47	24		South	0	0	0	1	879	367	0.2	9.899	2	0	0			10	0	0	1.16173	1	1.16173	3.55793	0	0	0	0
NDLP (2) Innovative Schemes	Gloucestershire, Wiltshire and Swindon	0	1.5	14.82	12		South	0	0	0	1	847	614	0.1	7.24	2	0	0			7	0	0	2.09392	1	2.09392	8.88536	0	0	0	0
NDLP (2) Innovative Schemes	Hampshire and Isle of Wight	0	1.6	14.38	14		South	0	0	0	1	706	415	0.2	11.11	2	0	0			8	0	0	2.75248	1	2.75248	4.12781	0	0	0	0
NDLP (2) Innovative Schemes	Kent	0	2.2	13.6	23		South	0	0	0	1	1380	374	0.4	9.63	1	0	0			9	0	0	1.26168	1	1.26168	5.66978	0	0	0	0
NDLP (2) Innovative Schemes	Leicestershire, Rutland and Northamptonshire	0	2.5	15.62	6		Midlands	0	1	0	0	706	490	0.1	9.88	3	0	0			14	0	0	2.51518	1	2.51518	4.81174	0	0	0	0
NDLP (2) Innovative Schemes	London (Brent, Harrow and Hillingdon)	0	3.5	12.05	33		London	0	0	1	0	900	21	4.3	4.681	1	0	0			39	0	0	2.62551	1	2.62551	7.93207	0	0	0	0
NDLP (2) Innovative Schemes	London (Central)	0	3.6	9.38	40		London	0	0	1	0	1879	7	26.8	5.527	3	0	0			29	0	0	3.56432	1	3.56432	9.81907	0	0	0	0
NDLP (2) Innovative Schemes	London (City and East)	1	7.3	12.26	32		London	0	0	1	0	1179	8	14.7	4.534	3	0	0			43	0	0	2.74151	1	2.74151	23.7583	0	0	0	0
NDLP (2) Innovative Schemes	London (Lambeth, Southwark and Wandsworth)	0	4.3	11.19	35		London	0	0	1	0	1354	9	15	5.698	2	0	0			29	0	0	4.48403	1	4.48403	14.0347	0	0	0	0
NDLP (2) Innovative Schemes	London (North East)	1	3.8	14.38	15		London	0	0	1	0	834	24	3.5	5.397	1	0	0			31	0	0	3.81323	1	3.81323	7.99333	0	0	0	0
NDLP (2) Innovative Schemes	London (North)	0	4.5	10.07	38		London	0	0	1	0	1687	20	8.4	5.391	1	0	0			31	0	0	5.76145	1	5.76145	15.4183	0	0	0	0
NDLP (2) Innovative Schemes	London (South East)	0	3.8	15.03	11		London	0	0	1	0	1119	14	8	4.467	3	0	0			26	0	0	3.98702	1	3.98702	14.1639	0	0	0	0
NDLP (2) Innovative Schemes	London (South)	0	2	12.6	29		London	0	0	1	0	1748	41	4.3	8.583	2	0	0			23	0	0	4.71513	1	4.71513	6.48841	0	0	0	0
NDLP (2) Innovative Schemes	London (West)	0	3.3	12.4	30		London	0	0	1	0	781	13	6	4.73	2	0	0			34	0	0	3.64693	1	3.64693	22.2896	0	0	0	0
NDLP (2) Innovative Schemes	Manchester (Central)	0	4	12.88	28		North	1	0	0	0	1084	32	3.4	5.512	1	0	0			18	0	0	2.39478	1	2.39478	9.082	0	0	0	0
NDLP (2) Innovative Schemes	Manchester (East and West)	0	3.1	16.94	2		North	1	0	0	0	1458	96	1.5	10.233	4	0	0			11	0	0	3.41933	1	3.41933	6.24059	0	0	0	0
NDLP (2) Innovative Schemes	Marches	0	2	15.72	5		Midlands	0	1	0	0	1297	741	0.2	7.062	4	0	0			6	0	0	2.18918	1	2.18918	15.6938	0	0	0	0
NDLP (2) Innovative Schemes	Merseyside	0	5.5	11.44	34		North	1	0	0	0	1000	64	1.6	8.258	3	0	0			6	0	0	1.61298	1	1.61298	4.73965	0	0	0	0
NDLP (2) Innovative Schemes	Norfolk	1	2.3	13.26	25		South	0	0	0	1	1061	537	0.2	4.791	0	0	0			7	0	0	0.30683	1	0.30683	11.2169	0	0	0	0
NDLP (2) Innovative Schemes	North East Yorkshire and the Humber	0	2.8	13.12	26		North	1	0	0	0	833	1183	0.1	10.006	1	0	0			7	0	0	2.29562	1	2.29562	2.78133	0	0	0	0
NDLP (2) Innovative Schemes	Northumbria	0	3.1	10.31	37		North	1	0	0	0	1944	542	0.4	6.841	6	0	0			7	0	0	2.70136	1	2.70136	11.0072	0	0	0	0
NDLP (2) Innovative Schemes	Nottinghamshire and Lincolnshire	1	2.7	14.05	17		Midlands	0	1	0	0	2622	808	0.3	10.397	2	0	0			9	0	0	0.89353	1	0.89353	3.2721	0	0	0	0
NDLP (2) Innovative Schemes	South Tyne and Wear Valley	0	4.3	17.82	1		North	1	0	0	0	993	236	0.4	4.802	2	0	0			5	0	0	2.4115	1	2.4115	13.3132	0	0	0	0
NDLP (2) Innovative Schemes	South Yorkshire	1	3.5	12.91	27		North	1	0	0	0	1652	155	1.1	7.845	4	0	0			10	0	0	2.07266	1	2.07266	14.3531	0	0	0	0
NDLP (2) Innovative Schemes	Staffordshire	0	2.2	15.23	9		Midlands	0	1	0	0	656	271	0.2	6.501	1	0	0			7	0	0	1.66897	1	1.66897	6.38517	0	0	0	0
NDLP (2) Innovative Schemes	Surrey and Sussex	0	1.5	13.98	18		South	0	0	0	1	2168	544	0.4	15.376	4	0	0			10	0	0	1.09781	1	1.09781	3.7526	0	0	0	0
NDLP (2) Innovative Schemes	Tees Valley	0	4.8	11.13	36		North	1	0	0	0	1226	79	1.6	3.984	4	0	0			6	0	0	4.10392	1	4.10392	18.6145	0	0	0	0
NDLP (2) Innovative Schemes	Thames Valley (Berks, Bucks, Oxfs)	1	1.4	15.12	10		South	0	0	0	1	1052	574	0.2	13.476	1	0	0			14	0	0	2.68106	1	2.68106	3.32072	0	0	0	0
NDLP (2) Innovative Schemes	West Of England	0	1.7	16.52	3		South	0	0	0	1	1674	133	1.3	6.329	3	0	0			10	0	0	1.83441	1	1.83441	5.71022	0	0	0	0
NDLP (2) Innovative Schemes	West Yorkshire	0	3.3	13.86	19		North	1	0	0	0	2180	203	1.1	13.065	2	0	0			16	0	0	1.41906	1	1.41906	2.33295	0	0	0	0
NDP	Bedfordshire and Hertfordshire	0	2	15.25	8		South	0	0	0	1	1221	288	0.4	10.06	2	1	1			15	0	0	1.55467	0	0	3.32505	0	0	8	8
NDP	Birmingham and Solihull	0	6.9	9.7	39		Midlands	0	1	0	0	1834	45	4.1	7.242	2	1	1			29	0	0	0.7636	0	0	6.24827	0	0	39	39
NDP	Black Country	0	5.4	13.68	21		Midlands	0	1	0	0	1636	36	4.5	6.501	2	1	1			19	0	0	5.12844	0	0	4.99923	0	0	21	21
NDP	Cambridgeshire and Suffolk	0	2	14.25	16		South	0	0	0	1	1639	719	0.2	8.607	2	1	1			11	0	0	1.31637	0	0	4.89601	0	0	16	16
NDP	Cheshire, Halton and Warrington	0	2.2	15.96	4		North	1	0	0	0	1654	234	0.7	6.067	2	1	1			4	0	0	3.57013	0	0	9.15774	0	0	4	4
NDP	Coventry and Warwickshire	0	2.9	12.26	31		Midlands	0	1	0	0	734	207	0.4	5.056	3	1	1			14	0	0	1.17089	0	0	7.97666	0	0	31	31
NDP	Cumbria and Lancashire	0	2.3	15.38	7		North	1	0	0	0	1212	984	0.1	11.59	3	1	1			8	0	0	1.22174	0	0	2.47714	0	0	7	7
NDP	Derbyshire	0	2.6	14.61	13		Midlands	0	1	0	0	825	262	0.3	5.96	2	1	1			7	0	0	1.04362	0	0	12.0721	0	0	13	13
NDP	Devon and Cornwall	0	1.7	13.82	20		South	0	0	0	1	684	1027	0.1	9.404	5	1	1			5	0	0	2.47554	0	0	3.83879	0	0	20	20
NDP	Dorset and Somerset	0	1.3	13.63	22		South	0	0	0	1	841	610	0.1	6.932	1	1	1			6	0	0	2.75534	0	0	6.36757	0	0	22	22
NDP	Essex	0	2	13.47	24		South	0	0	0	1	879	367	0.2	9.899	2	1	1			10	0	0	1.16173	0	0	3.55793	0	0	24	24
NDP	Gloucestershire, Wiltshire and Swindon	0	1.5	14.82	12		South	0	0	0	1	847	614	0.1	7.24	2	1	1			7	0	0	2.09392	0	0	8.88536	0	0	12	12
NDP	Hampshire and Isle of Wight	0	1.6	14.38	14		South	0	0	0	1	706	415	0.2	11.11	2	1	1			8	0	0	2.75248	0	0	4.12781	0	0	14	14
NDP	Kent	0	2.2	13.6	23		South	0	0	0	1	1380	374	0.4	9.63	1	1	1			9	0	0	1.26168	0	0	5.66978	0	0	23	23
NDP	Leicestershire, Rutland and Northamptonshire	0	2.5	15.62	6		Midlands	0	1	0	0	706	490	0.1	9.88	3	1	1			14	0	0	2.51518	0	0	4.81174	0	0	6	6
NDP	London (Brent, Harrow and Hillingdon)	0	3.5	12.05	33		London	0	0	1	0	900	21	4.3	4.681	1	1	1			39	0	0	2.62551	0	0	7.93207	0	0	33	33
NDP	London (Central)	0	3.6	9.38	40		London	0	0	1	0	1879	7	26.8	5.527	3	1	1			29	0	0	3.56432	0	0	9.81907	0	0	40	40
NDP	London (City and East)	0	7.3	12.26	32		London	0	0	1	0	1179	8	14.7	4.534	3	1	1			43	0	0	2.74151	0	0	23.7583	0	0	32	32
NDP	London (Lambeth, Southwark and Wandsworth)	0	4.3	11.19	35		London	0	0	1	0	1354	9	15	5.698	2	1	1			29	0	0	4.48403	0	0	14.0347	0	0	35	35
NDP	London (North East)	0	3.8	14.38	15		London	0	0	1	0	834	24	3.5	5.397	1	1	1			31	0	0	3.81323	0	0	7.99333	0	0	15	15
NDP	London (North)	0	4.5	10.07	38		London	0	0	1	0	1687	20	8.4	5.391	1	1	1			31	0	0	5.76145	0	0	15.4183	0	0	38	38
NDP	London (South East)	0	3.8	15.03	11		London	0	0	1	0	1119	14	8	4.467	3	1	1			26	0	0	3.98702	0	0	14.1639	0	0	11	11
NDP	London (South)	0	2	12.6	29		London	0	0	1	0	1748	41	4.3	8.583	2	1	1			23	0	0	4.71513	0	0	6.48841	0	0	29	29
NDP	London (West)	0	3.3	12.4	30		London	0	0	1	0	781	13	6	4.73	2	1	1			34	0	0	3.64693	0	0	22.2896	0	0	30	30
NDP	Manchester (Central)	0	4	12.88	28		North	1	0	0	0	1084	32	3.4	5.512	1	1	1			18	0	0	2.39478	0	0	9.082	0	0	28	28
NDP	Manchester (East and West)	0	3.1	16.94	2		North	1	0	0	0	1458	96	1.5	10.233	4	1	1			11	0	0	3.41933	0	0	6.24059	0	0	2	2
NDP	Marches	0	2	15.72	5		Midlands	0	1	0	0	1297	741	0.2	7.062	4	1	1			6	0	0	2.18918	0	0	15.6938	0	0	5	5
NDP	Merseyside	0	5.5	11.44	34		North	1	0	0	0	1000	64	1.6	8.258	3	1	1			6	0	0	1.61298	0	0	4.73965	0	0	34	34
NDP	Norfolk	0	2.3	13.26	25		South	0	0	0	1	1061	537	0.2	4.791	0	1	1			7	0	0	0.30683	0	0	11.2169	0	0	25	25
NDP	North East Yorkshire and the Humber	0	2.8	13.12	26		North	1	0	0	0	833	1183	0.1	10.006	1	1	1			7	0	0	2.29562	0	0	2.78133	0	0	26	26
NDP	Northumbria	0	3.1	10.31	37		North	1	0	0	0	1944	542	0.4	6.841	5	1	1			7	0	0	2.70136	0	0	11.0072	0	0	37	37
NDP	Nottinghamshire and Lincolnshire	0	2.7	14.05	17		Midlands	0	1	0	0	2622	808	0.3	10.397	2	1	1			9	0	0	0.89353	0	0	3.2721	0	0	17	17
NDP	South Tyne and Wear Valley	0	4.3	17.82	1		North	1	0	0	0	993	236	0.4	4.802	1	1	1			5	0	0	2.4115	0	0	13.3132	0	0	1	1
NDP	South Yorkshire	0	3.5	12.91	27		North	1	0	0	0	1652	155	1.1	7.845	4	1	1			10	0	0	2.07266	0	0	14.3531	0	0	27	27
NDP	Staffordshire	0	2.2	15.23	9		Midlands	0	1	0	0	656	271	0.2	6.501	1	1	1			7	0	0	1.66897	0	0	6.38517	0	0	9	9
NDP	Surrey and Sussex	0	1.5	13.98	18		South	0	0	0	1	2168	544	0.4	15.376	4	1	1			10	0	0	1.09781	0	0	3.7526	0	0	18	18
NDP	Tees Valley	0	4.8	11.13	36		North	1	0	0	0	1226	79	1.6	3.984	3	1	1			6	0	0	4.10392	0	0	18.6145	0	0	36	36
NDP	Thames Valley (Berks, Bucks, Oxfs)	0	1.4	15.12	10		South	0	0	0	1	1052	574	0.2	13.476	1	1	1			14	0	0	2.68106	0	0	3.32072	0	0	10	10
NDP	West Of England	0	1.7	16.52	3		South	0	0	0	1	1674	133	1.3	6.329	3	1	1			10	0	0	1.83441	0	0	5.71022	0	0	3	3
NDP	West Yorkshire	1	3.3	13.86	19		North	1	0	0	0	2180	203	1.1	13.065	1	1	1			16	0	0	1.41906	0	0	2.33295	0	0	19	19
NDYP (1) Pathfinder	Bedfordshire and Hertfordshire	1	2	18.12	7		South	0	0	0	1	1221	288	0.4	10.06	0	1	1			15	0	0	1.55467	0	0	3.32505	0	0	7	7
NDYP (1) Pathfinder	Birmingham and Solihull	0	6.9	11.33	39		Midlands	0	1	0	0	1834	45	4.1	7.242	0	1	1			29	0	0	0.7636	0	0	6.24827	0	0	39	39
NDYP (1) Pathfinder	Black Country	1	5.4	15.3	22		Midlands	0	1	0	0	1636	36	4.5	6.501	0	1	1			19	0	0	5.12844	0	0	4.99923	0	0	22	22
NDYP (1) Pathfinder	Cambridgeshire and Suffolk	0	2	17.45	13		South	0	0	0	1	1639	719	0.2	8.607	1	1	1			11	0	0	1.31637	0	0	4.89601	0	0	13	13
NDYP (1) Pathfinder	Cheshire, Halton and Warrington	0	2.2	17.91	9		North	1	0	0	0	1654	234	0.7	6.067	1	1	1			4	0	0	3.57013	0	0	9.15774	0	0	9	9
NDYP (1) Pathfinder	Coventry and Warwickshire	0	2.9	14.18	29		Midlands	0	1	0	0	734	207	0.4	5.056	1	1	1			14	0	0	1.17089	0	0	7.97666	0	0	29	29
NDYP (1) Pathfinder	Cumbria and Lancashire	1	2.3	17.8	11		North	1	0	0	0	1212	984	0.1	11.59	0	1	1			8	0	0	1.22174	0	0	2.47714	0	0	11	11
NDYP (1) Pathfinder	Derbyshire	1	2.6	18.54	4		Midlands	0	1	0	0	825	262	0.3	5.96	0	1	1			7	0	0	1.04362	0	0	12.0721	0	0	4	4
NDYP (1) Pathfinder	Devon and Cornwall	1	1.7	14.06	30		South	0	0	0	1	684	1027	0.1	9.404	0	1	1			5	0	0	2.47554	0	0	3.83879	0	0	30	30
NDYP (1) Pathfinder	Dorset and Somerset	0	1.3	15.88	20		South	0	0	0	1	841	610	0.1	6.932	0	1	1			6	0	0	2.75534	0	0	6.36757	0	0	20	20
NDYP (1) Pathfinder	Essex	0	2	15.78	21		South	0	0	0	1	879	367	0.2	9.899	0	1	1			10	0	0	1.16173	0	0	3.55793	0	0	21	21
NDYP (1) Pathfinder	Gloucestershire, Wiltshire and Swindon	0	1.5	17	16		South	0	0	0	1	847	614	0.1	7.24	0	1	1			7	0	0	2.09392	0	0	8.88536	0	0	16	16
NDYP (1) Pathfinder	Hampshire and Isle of Wight	0	1.6	16.44	18		South	0	0	0	1	706	415	0.2	11.11	0	1	1			8	0	0	2.75248	0	0	4.12781	0	0	18	18
NDYP (1) Pathfinder	Kent	0	2.2	16.25	19		South	0	0	0	1	1380	374	0.4	9.63	0	1	1			9	0	0	1.26168	0	0	5.66978	0	0	19	19
NDYP (1) Pathfinder	Leicestershire, Rutland and Northamptonshire	0	2.5	18.37	6		Midlands	0	1	0	0	706	490	0.1	9.88	0	1	1			14	0	0	2.51518	0	0	4.81174	0	0	6	6
NDYP (1) Pathfinder	London (Brent, Harrow and Hillingdon)	0	3.5	13.85	32		London	0	0	1	0	900	21	4.3	4.681	0	1	1			39	0	0	2.62551	0	0	7.93207	0	0	32	32
NDYP (1) Pathfinder	London (Central)	0	3.6	11.74	37		London	0	0	1	0	1879	7	26.8	5.527	0	1	1			29	0	0	3.56432	0	0	9.81907	0	0	37	37
NDYP (1) Pathfinder	London (City and East)	0	7.3	14.84	26		London	0	0	1	0	1179	8	14.7	4.534	0	1	1			43	0	0	2.74151	0	0	23.7583	0	0	26	26
NDYP (1) Pathfinder	London (Lambeth, Southwark and Wandsworth)	1	4.3	13.26	33		London	0	0	1	0	1354	9	15	5.698	0	1	1			29	0	0	4.48403	0	0	14.0347	0	0	33	33
NDYP (1) Pathfinder	London (North East)	0	3.8	17.96	8		London	0	0	1	0	834	24	3.5	5.397	0	1	1			31	0	0	3.81323	0	0	7.99333	0	0	8	8
NDYP (1) Pathfinder	London (North)	0	4.5	12.54	35		London	0	0	1	0	1687	20	8.4	5.391	0	1	1			31	0	0	5.76145	0	0	15.4183	0	0	35	35
NDYP (1) Pathfinder	London (South East)	0	3.8	17.13	14		London	0	0	1	0	1119	14	8	4.467	0	1	1			26	0	0	3.98702	0	0	14.1639	0	0	14	14
NDYP (1) Pathfinder	London (South)	0	2	13.89	31		London	0	0	1	0	1748	41	4.3	8.583	0	1	1			23	0	0	4.71513	0	0	6.48841	0	0	31	31
NDYP (1) Pathfinder	London (West)	0	3.3	14.87	25		London	0	0	1	0	781	13	6	4.73	0	1	1			34	0	0	3.64693	0	0	22.2896	0	0	25	25
NDYP (1) Pathfinder	Manchester (Central)	0	4	14.42	28		North	1	0	0	0	1084	32	3.4	5.512	0	1	1			18	0	0	2.39478	0	0	9.082	0	0	28	28
NDYP (1) Pathfinder	Manchester (East and West)	0	3.1	20.9	2		North	1	0	0	0	1458	96	1.5	10.233	0	1	1			11	0	0	3.41933	0	0	6.24059	0	0	2	2
NDYP (1) Pathfinder	Marches	0	2	17.07	15		Midlands	0	1	0	0	1297	741	0.2	7.062	1	1	1			6	0	0	2.18918	0	0	15.6938	0	0	15	15
NDYP (1) Pathfinder	Merseyside	1	5.5	12.27	36		North	1	0	0	0	1000	64	1.6	8.258	0	1	1			6	0	0	1.61298	0	0	4.73965	0	0	36	36
NDYP (1) Pathfinder	Norfolk	0	2.3	14.9	24		South	0	0	0	1	1061	537	0.2	4.791	0	1	1			7	0	0	0.30683	0	0	11.2169	0	0	24	24
NDYP (1) Pathfinder	North East Yorkshire and the Humber	0	2.8	14.58	27		North	1	0	0	0	833	1183	0.1	10.006	0	1	1			7	0	0	2.29562	0	0	2.78133	0	0	27	27
NDYP (1) Pathfinder	Northumbria	1	3.1	10.95	40		North	1	0	0	0	1944	542	0.4	6.841	0	1	1			7	0	0	2.70136	0	0	11.0072	0	0	40	40
NDYP (1) Pathfinder	Nottinghamshire and Lincolnshire	0	2.7	17.91	10		Midlands	0	1	0	0	2622	808	0.3	10.397	0	1	1			9	0	0	0.89353	0	0	3.2721	0	0	10	10
NDYP (1) Pathfinder	South Tyne and Wear Valley	0	4.3	19.01	3		North	1	0	0	0	993	236	0.4	4.802	0	1	1			5	0	0	2.4115	0	0	13.3132	0	0	3	3
NDYP (1) Pathfinder	South Yorkshire	1	3.5	12.56	34		North	1	0	0	0	1652	155	1.1	7.845	1	1	1			10	0	0	2.07266	0	0	14.3531	0	0	34	34
NDYP (1) Pathfinder	Staffordshire	0	2.2	17.69	12		Midlands	0	1	0	0	656	271	0.2	6.501	0	1	1			7	0	0	1.66897	0	0	6.38517	0	0	12	12
NDYP (1) Pathfinder	Surrey and Sussex	1	1.5	16.99	17		South	0	0	0	1	2168	544	0.4	15.376	1	1	1			10	0	0	1.09781	0	0	3.7526	0	0	17	17
NDYP (1) Pathfinder	Tees Valley	0	4.8	11.38	38		North	1	0	0	0	1226	79	1.6	3.984	0	1	1			6	0	0	4.10392	0	0	18.6145	0	0	38	38
NDYP (1) Pathfinder	Thames Valley (Berks, Bucks, Oxfs)	0	1.4	18.49	5		South	0	0	0	1	1052	574	0.2	13.476	0	1	1			14	0	0	2.68106	0	0	3.32072	0	0	5	5
NDYP (1) Pathfinder	West Of England	0	1.7	23.5	1		South	0	0	0	1	1674	133	1.3	6.329	0	1	1			10	0	0	1.83441	0	0	5.71022	0	0	1	1
NDYP (1) Pathfinder	West Yorkshire	0	3.3	15.01	23		North	1	0	0	0	2180	203	1.1	13.065	0	1	1			16	0	0	1.41906	0	0	2.33295	0	0	23	23
NDYP (2) Intensive Gateway (2000)	Bedfordshire and Hertfordshire	1	2	15.25	8		South	0	0	0	1	1221	288	0.4	10.06	2	0	1			15	0	0	1.55467	0	0	3.32505	0	0	0	8
NDYP (2) Intensive Gateway (2000)	Birmingham and Solihull	0	6.9	9.7	39		Midlands	0	1	0	0	1834	45	4.1	7.242	3	0	1			29	0	0	0.7636	0	0	6.24827	0	0	0	39
NDYP (2) Intensive Gateway (2000)	Black Country	0	5.4	13.68	21		Midlands	0	1	0	0	1636	36	4.5	6.501	2	0	1			19	0	0	5.12844	0	0	4.99923	0	0	0	21
NDYP (2) Intensive Gateway (2000)	Cambridgeshire and Suffolk	0	2	14.25	16		South	0	0	0	1	1639	719	0.2	8.607	3	0	1			11	0	0	1.31637	0	0	4.89601	0	0	0	16
NDYP (2) Intensive Gateway (2000)	Cheshire, Halton and Warrington	0	2.2	15.96	4		North	1	0	0	0	1654	234	0.7	6.067	3	0	1			4	0	0	3.57013	0	0	9.15774	0	0	0	4
NDYP (2) Intensive Gateway (2000)	Coventry and Warwickshire	0	2.9	12.26	31		Midlands	0	1	0	0	734	207	0.4	5.056	4	0	1			14	0	0	1.17089	0	0	7.97666	0	0	0	31
NDYP (2) Intensive Gateway (2000)	Cumbria and Lancashire	0	2.3	15.38	7		North	1	0	0	0	1212	984	0.1	11.59	3	0	1			8	0	0	1.22174	0	0	2.47714	0	0	0	7
NDYP (2) Intensive Gateway (2000)	Derbyshire	0	2.6	14.61	13		Midlands	0	1	0	0	825	262	0.3	5.96	2	0	1			7	0	0	1.04362	0	0	12.0721	0	0	0	13
NDYP (2) Intensive Gateway (2000)	Devon and Cornwall	1	1.7	13.82	20		South	0	0	0	1	684	1027	0.1	9.404	5	0	1			5	0	0	2.47554	0	0	3.83879	0	0	0	20
NDYP (2) Intensive Gateway (2000)	Dorset and Somerset	0	1.3	13.63	22		South	0	0	0	1	841	610	0.1	6.932	2	0	1			6	0	0	2.75534	0	0	6.36757	0	0	0	22
NDYP (2) Intensive Gateway (2000)	Essex	0	2	13.47	24		South	0	0	0	1	879	367	0.2	9.899	3	0	1			10	0	0	1.16173	0	0	3.55793	0	0	0	24
NDYP (2) Intensive Gateway (2000)	Gloucestershire, Wiltshire and Swindon	0	1.5	14.82	12		South	0	0	0	1	847	614	0.1	7.24	2	0	1			7	0	0	2.09392	0	0	8.88536	0	0	0	12
NDYP (2) Intensive Gateway (2000)	Hampshire and Isle of Wight	0	1.6	14.38	14		South	0	0	0	1	706	415	0.2	11.11	2	0	1			8	0	0	2.75248	0	0	4.12781	0	0	0	14
NDYP (2) Intensive Gateway (2000)	Kent	0	2.2	13.6	23		South	0	0	0	1	1380	374	0.4	9.63	1	0	1			9	0	0	1.26168	0	0	5.66978	0	0	0	23
NDYP (2) Intensive Gateway (2000)	Leicestershire, Rutland and Northamptonshire	0	2.5	15.62	6		Midlands	0	1	0	0	706	490	0.1	9.88	3	0	1			14	0	0	2.51518	0	0	4.81174	0	0	0	6
NDYP (2) Intensive Gateway (2000)	London (Brent, Harrow and Hillingdon)	0	3.5	12.05	33		London	0	0	1	0	900	21	4.3	4.681	1	0	1			39	0	0	2.62551	0	0	7.93207	0	0	0	33
NDYP (2) Intensive Gateway (2000)	London (Central)	0	3.6	9.38	40		London	0	0	1	0	1879	7	26.8	5.527	3	0	1			29	0	0	3.56432	0	0	9.81907	0	0	0	40
NDYP (2) Intensive Gateway (2000)	London (City and East)	1	7.3	12.26	32		London	0	0	1	0	1179	8	14.7	4.534	4	0	1			43	0	0	2.74151	0	0	23.7583	0	0	0	32
NDYP (2) Intensive Gateway (2000)	London (Lambeth, Southwark and Wandsworth)	0	4.3	11.19	35		London	0	0	1	0	1354	9	15	5.698	2	0	1			29	0	0	4.48403	0	0	14.0347	0	0	0	35
NDYP (2) Intensive Gateway (2000)	London (North East)	0	3.8	14.38	15		London	0	0	1	0	834	24	3.5	5.397	3	0	1			31	0	0	3.81323	0	0	7.99333	0	0	0	15
NDYP (2) Intensive Gateway (2000)	London (North)	0	4.5	10.07	38		London	0	0	1	0	1687	20	8.4	5.391	1	0	1			31	0	0	5.76145	0	0	15.4183	0	0	0	38
NDYP (2) Intensive Gateway (2000)	London (South East)	0	3.8	15.03	11		London	0	0	1	0	1119	14	8	4.467	3	0	1			26	0	0	3.98702	0	0	14.1639	0	0	0	11
NDYP (2) Intensive Gateway (2000)	London (South)	0	2	12.6	29		London	0	0	1	0	1748	41	4.3	8.583	2	0	1			23	0	0	4.71513	0	0	6.48841	0	0	0	29
NDYP (2) Intensive Gateway (2000)	London (West)	0	3.3	12.4	30		London	0	0	1	0	781	13	6	4.73	2	0	1			34	0	0	3.64693	0	0	22.2896	0	0	0	30
NDYP (2) Intensive Gateway (2000)	Manchester (Central)	0	4	12.88	28		North	1	0	0	0	1084	32	3.4	5.512	1	0	1			18	0	0	2.39478	0	0	9.082	0	0	0	28
NDYP (2) Intensive Gateway (2000)	Manchester (East and West)	0	3.1	16.94	2		North	1	0	0	0	1458	96	1.5	10.233	4	0	1			11	0	0	3.41933	0	0	6.24059	0	0	0	2
NDYP (2) Intensive Gateway (2000)	Marches	1	2	15.72	5		Midlands	0	1	0	0	1297	741	0.2	7.062	4	0	1			6	0	0	2.18918	0	0	15.6938	0	0	0	5
NDYP (2) Intensive Gateway (2000)	Merseyside	1	5.5	11.44	34		North	1	0	0	0	1000	64	1.6	8.258	3	0	1			6	0	0	1.61298	0	0	4.73965	0	0	0	34
NDYP (2) Intensive Gateway (2000)	Norfolk	0	2.3	13.26	25		South	0	0	0	1	1061	537	0.2	4.791	1	0	1			7	0	0	0.30683	0	0	11.2169	0	0	0	25
NDYP (2) Intensive Gateway (2000)	North East Yorkshire and the Humber	0	2.8	13.12	26		North	1	0	0	0	833	1183	0.1	10.006	1	0	1			7	0	0	2.29562	0	0	2.78133	0	0	0	26
NDYP (2) Intensive Gateway (2000)	Northumbria	0	3.1	10.31	37		North	1	0	0	0	1944	542	0.4	6.841	6	0	1			7	0	0	2.70136	0	0	11.0072	0	0	0	37
NDYP (2) Intensive Gateway (2000)	Nottinghamshire and Lincolnshire	1	2.7	14.05	17		Midlands	0	1	0	0	2622	808	0.3	10.397	4	0	1			9	0	0	0.89353	0	0	3.2721	0	0	0	17
NDYP (2) Intensive Gateway (2000)	South Tyne and Wear Valley	1	4.3	17.82	1		North	1	0	0	0	993	236	0.4	4.802	2	0	1			5	0	0	2.4115	0	0	13.3132	0	0	0	1
NDYP (2) Intensive Gateway (2000)	South Yorkshire	1	3.5	12.91	27		North	1	0	0	0	1652	155	1.1	7.845	5	0	1			10	0	0	2.07266	0	0	14.3531	0	0	0	27
NDYP (2) Intensive Gateway (2000)	Staffordshire	0	2.2	15.23	9		Midlands	0	1	0	0	656	271	0.2	6.501	1	0	1			7	0	0	1.66897	0	0	6.38517	0	0	0	9
NDYP (2) Intensive Gateway (2000)	Surrey and Sussex	0	1.5	13.98	18		South	0	0	0	1	2168	544	0.4	15.376	4	0	1			10	0	0	1.09781	0	0	3.7526	0	0	0	18
NDYP (2) Intensive Gateway (2000)	Tees Valley	0	4.8	11.13	36		North	1	0	0	0	1226	79	1.6	3.984	4	0	1			6	0	0	4.10392	0	0	18.6145	0	0	0	36
NDYP (2) Intensive Gateway (2000)	Thames Valley (Berks, Bucks, Oxfs)	0	1.4	15.12	10		South	0	0	0	1	1052	574	0.2	13.476	3	0	1			14	0	0	2.68106	0	0	3.32072	0	0	0	10
NDYP (2) Intensive Gateway (2000)	West Of England	0	1.7	16.52	3		South	0	0	0	1	1674	133	1.3	6.329	3	0	1			10	0	0	1.83441	0	0	5.71022	0	0	0	3
NDYP (2) Intensive Gateway (2000)	West Yorkshire	0	3.3	13.86	19		North	1	0	0	0	2180	203	1.1	13.065	3	0	1			16	0	0	1.41906	0	0	2.33295	0	0	0	19
NDYP (3) Tailored Pathways (Jan-Mar 2002)	Bedfordshire and Hertfordshire		2	15.49	13		South	0	0	0	1	1221	288	0.4	10.06	4	0	1			15	0	0	1.55467	0	0	3.32505	0	0	0	13
NDYP (3) Tailored Pathways (Jan-Mar 2002)	Birmingham and Solihull		6.9	11.34	38		Midlands	0	1	0	0	1834	45	4.1	7.242	4	0	1			29	0	0	0.7636	0	0	6.24827	0	0	0	38
NDYP (3) Tailored Pathways (Jan-Mar 2002)	Black Country		5.4	12.67	33		Midlands	0	1	0	0	1636	36	4.5	6.501	3	0	1			19	0	0	5.12844	0	0	4.99923	0	0	0	33
NDYP (3) Tailored Pathways (Jan-Mar 2002)	Cambridgeshire and Suffolk		2	15.02	15		South	0	0	0	1	1639	719	0.2	8.607	3	0	1			11	0	0	1.31637	0	0	4.89601	0	0	0	15
NDYP (3) Tailored Pathways (Jan-Mar 2002)	Cheshire, Halton and Warrington		2.2	16.5	5		North	1	0	0	0	1654	234	0.7	6.067	3	0	1			4	0	0	3.57013	0	0	9.15774	0	0	0	5
NDYP (3) Tailored Pathways (Jan-Mar 2002)	Coventry and Warwickshire		2.9	14.43	20		Midlands	0	1	0	0	734	207	0.4	5.056	4	0	1			14	0	0	1.17089	0	0	7.97666	0	0	0	20
NDYP (3) Tailored Pathways (Jan-Mar 2002)	Cumbria and Lancashire		2.3	15.45	14		North	1	0	0	0	1212	984	0.1	11.59	3	0	1			8	0	0	1.22174	0	0	2.47714	0	0	0	14
NDYP (3) Tailored Pathways (Jan-Mar 2002)	Derbyshire		2.6	13.83	25		Midlands	0	1	0	0	825	262	0.3	5.96	3	0	1			7	0	0	1.04362	0	0	12.0721	0	0	0	25
NDYP (3) Tailored Pathways (Jan-Mar 2002)	Devon and Cornwall		1.7	16.25	8		South	0	0	0	1	684	1027	0.1	9.404	7	0	1			5	0	0	2.47554	0	0	3.83879	0	0	0	8
NDYP (3) Tailored Pathways (Jan-Mar 2002)	Dorset and Somerset		1.3	16.51	4		South	0	0	0	1	841	610	0.1	6.932	3	0	1			6	0	0	2.75534	0	0	6.36757	0	0	0	4
NDYP (3) Tailored Pathways (Jan-Mar 2002)	Essex		2	16.12	9		South	0	0	0	1	879	367	0.2	9.899	3	0	1			10	0	0	1.16173	0	0	3.55793	0	0	0	9
NDYP (3) Tailored Pathways (Jan-Mar 2002)	Gloucestershire, Wiltshire and Swindon		1.5	14.27	23		South	0	0	0	1	847	614	0.1	7.24	2	0	1			7	0	0	2.09392	0	0	8.88536	0	0	0	23
NDYP (3) Tailored Pathways (Jan-Mar 2002)	Hampshire and Isle of Wight		1.6	16.87	2		South	0	0	0	1	706	415	0.2	11.11	2	0	1			8	0	0	2.75248	0	0	4.12781	0	0	0	2
NDYP (3) Tailored Pathways (Jan-Mar 2002)	Kent		2.2	15.83	12		South	0	0	0	1	1380	374	0.4	9.63	2	0	1			9	0	0	1.26168	0	0	5.66978	0	0	0	12
NDYP (3) Tailored Pathways (Jan-Mar 2002)	Leicestershire, Rutland and Northamptonshire		2.5	14.17	24		Midlands	0	1	0	0	706	490	0.1	9.88	3	0	1			14	0	0	2.51518	0	0	4.81174	0	0	0	24
NDYP (3) Tailored Pathways (Jan-Mar 2002)	London (Brent, Harrow and Hillingdon)		3.5	12.81	31		London	0	0	1	0	900	21	4.3	4.681	1	0	1			39	0	0	2.62551	0	0	7.93207	0	0	0	31
NDYP (3) Tailored Pathways (Jan-Mar 2002)	London (Central)		3.6	10.47	39		London	0	0	1	0	1879	7	26.8	5.527	3	0	1			29	0	0	3.56432	0	0	9.81907	0	0	0	39
NDYP (3) Tailored Pathways (Jan-Mar 2002)	London (City and East)		7.3	12.82	30		London	0	0	1	0	1179	8	14.7	4.534	5	0	1			43	0	0	2.74151	0	0	23.7583	0	0	0	30
NDYP (3) Tailored Pathways (Jan-Mar 2002)	London (Lambeth, Southwark and Wandsworth)		4.3	10.24	40		London	0	0	1	0	1354	9	15	5.698	2	0	1			29	0	0	4.48403	0	0	14.0347	0	0	0	40
NDYP (3) Tailored Pathways (Jan-Mar 2002)	London (North East)		3.8	12.53	34		London	0	0	1	0	834	24	3.5	5.397	3	0	1			31	0	0	3.81323	0	0	7.99333	0	0	0	34
NDYP (3) Tailored Pathways (Jan-Mar 2002)	London (North)		4.5	12.8	32		London	0	0	1	0	1687	20	8.4	5.391	2	0	1			31	0	0	5.76145	0	0	15.4183	0	0	0	32
NDYP (3) Tailored Pathways (Jan-Mar 2002)	London (South East)		3.8	17.83	1		London	0	0	1	0	1119	14	8	4.467	3	0	1			26	0	0	3.98702	0	0	14.1639	0	0	0	1
NDYP (3) Tailored Pathways (Jan-Mar 2002)	London (South)		2	12.06	36		London	0	0	1	0	1748	41	4.3	8.583	2	0	1			23	0	0	4.71513	0	0	6.48841	0	0	0	36
NDYP (3) Tailored Pathways (Jan-Mar 2002)	London (West)		3.3	13.54	26		London	0	0	1	0	781	13	6	4.73	2	0	1			34	0	0	3.64693	0	0	22.2896	0	0	0	26
NDYP (3) Tailored Pathways (Jan-Mar 2002)	Manchester (Central)		4	11.51	37		North	1	0	0	0	1084	32	3.4	5.512	2	0	1			18	0	0	2.39478	0	0	9.082	0	0	0	37
NDYP (3) Tailored Pathways (Jan-Mar 2002)	Manchester (East and West)		3.1	16.02	10		North	1	0	0	0	1458	96	1.5	10.233	4	0	1			11	0	0	3.41933	0	0	6.24059	0	0	0	10
NDYP (3) Tailored Pathways (Jan-Mar 2002)	Marches		2	16.86	3		Midlands	0	1	0	0	1297	741	0.2	7.062	6	0	1			6	0	0	2.18918	0	0	15.6938	0	0	0	3
NDYP (3) Tailored Pathways (Jan-Mar 2002)	Merseyside		5.5	12.07	35		North	1	0	0	0	1000	64	1.6	8.258	5	0	1			6	0	0	1.61298	0	0	4.73965	0	0	0	35
NDYP (3) Tailored Pathways (Jan-Mar 2002)	Norfolk		2.3	14.78	18		South	0	0	0	1	1061	537	0.2	4.791	1	0	1			7	0	0	0.30683	0	0	11.2169	0	0	0	18
NDYP (3) Tailored Pathways (Jan-Mar 2002)	North East Yorkshire and the Humber		2.8	14.6	19		North	1	0	0	0	833	1183	0.1	10.006	3	0	1			7	0	0	2.29562	0	0	2.78133	0	0	0	19
NDYP (3) Tailored Pathways (Jan-Mar 2002)	Northumbria		3.1	13.31	28		North	1	0	0	0	1944	542	0.4	6.841	7	0	1			7	0	0	2.70136	0	0	11.0072	0	0	0	28
NDYP (3) Tailored Pathways (Jan-Mar 2002)	Nottinghamshire and Lincolnshire		2.7	14.96	16		Midlands	0	1	0	0	2622	808	0.3	10.397	5	0	1			9	0	0	0.89353	0	0	3.2721	0	0	0	16
NDYP (3) Tailored Pathways (Jan-Mar 2002)	South Tyne and Wear Valley		4.3	13.47	27		North	1	0	0	0	993	236	0.4	4.802	6	0	1			5	0	0	2.4115	0	0	13.3132	0	0	0	27
NDYP (3) Tailored Pathways (Jan-Mar 2002)	South Yorkshire		3.5	14.33	21		North	1	0	0	0	1652	155	1.1	7.845	6	0	1			10	0	0	2.07266	0	0	14.3531	0	0	0	21
NDYP (3) Tailored Pathways (Jan-Mar 2002)	Staffordshire		2.2	15.98	11		Midlands	0	1	0	0	656	271	0.2	6.501	1	0	1			7	0	0	1.66897	0	0	6.38517	0	0	0	11
NDYP (3) Tailored Pathways (Jan-Mar 2002)	Surrey and Sussex		1.5	14.91	17		South	0	0	0	1	2168	544	0.4	15.376	4	0	1			10	0	0	1.09781	0	0	3.7526	0	0	0	17
NDYP (3) Tailored Pathways (Jan-Mar 2002)	Tees Valley		4.8	12.88	29		North	1	0	0	0	1226	79	1.6	3.984	4	0	1			6	0	0	4.10392	0	0	18.6145	0	0	0	29
NDYP (3) Tailored Pathways (Jan-Mar 2002)	Thames Valley (Berks, Bucks, Oxfs)		1.4	16.27	7		South	0	0	0	1	1052	574	0.2	13.476	4	0	1			14	0	0	2.68106	0	0	3.32072	0	0	0	7
NDYP (3) Tailored Pathways (Jan-Mar 2002)	West Of England		1.7	16.49	6		South	0	0	0	1	1674	133	1.3	6.329	3	0	1			10	0	0	1.83441	0	0	5.71022	0	0	0	6
NDYP (3) Tailored Pathways (Jan-Mar 2002)	West Yorkshire		3.3	14.33	22		North	1	0	0	0	2180	203	1.1	13.065	3	0	1			16	0	0	1.41906	0	0	2.33295	0	0	0	22
New Deal Next Phase	Bedfordshire and Hertfordshire	0	2	14.91	12		South	0	0	0	1	1221	288	0.4	10.06	4	0	0			15	0	0	1.55467	0	0	3.32505	0	0	0	0
New Deal Next Phase	Birmingham and Solihull	0	6.9	9.95	40		Midlands	0	1	0	0	1834	45	4.1	7.242	5	0	0			29	0	0	0.7636	0	0	6.24827	0	0	0	0
New Deal Next Phase	Black Country	1	5.4	11.53	37		Midlands	0	1	0	0	1636	36	4.5	6.501	3	0	0			19	0	0	5.12844	0	0	4.99923	0	0	0	0
New Deal Next Phase	Cambridgeshire and Suffolk	0	2	14.7	14		South	0	0	0	1	1639	719	0.2	8.607	3	0	0			11	0	0	1.31637	0	0	4.89601	0	0	0	0
New Deal Next Phase	Cheshire, Halton and Warrington	0	2.2	17.46	2		North	1	0	0	0	1654	234	0.7	6.067	3	0	0			4	0	0	3.57013	0	0	9.15774	0	0	0	0
New Deal Next Phase	Coventry and Warwickshire	0	2.9	13.84	21		Midlands	0	1	0	0	734	207	0.4	5.056	4	0	0			14	0	0	1.17089	0	0	7.97666	0	0	0	0
New Deal Next Phase	Cumbria and Lancashire	0	2.3	15.99	6		North	1	0	0	0	1212	984	0.1	11.59	3	0	0			8	0	0	1.22174	0	0	2.47714	0	0	0	0
New Deal Next Phase	Derbyshire	0	2.6	12.5	33		Midlands	0	1	0	0	825	262	0.3	5.96	3	0	0			7	0	0	1.04362	0	0	12.0721	0	0	0	0
New Deal Next Phase	Devon and Cornwall	0	1.7	16.3	4		South	0	0	0	1	684	1027	0.1	9.404	7	0	0			5	0	0	2.47554	0	0	3.83879	0	0	0	0
New Deal Next Phase	Dorset and Somerset	0	1.3	15.88	9		South	0	0	0	1	841	610	0.1	6.932	3	0	0			6	0	0	2.75534	0	0	6.36757	0	0	0	0
New Deal Next Phase	Essex	1	2	15.69	10		South	0	0	0	1	879	367	0.2	9.899	3	0	0			10	0	0	1.16173	0	0	3.55793	0	0	0	0
New Deal Next Phase	Gloucestershire, Wiltshire and Swindon	0	1.5	14.51	15		South	0	0	0	1	847	614	0.1	7.24	2	0	0			7	0	0	2.09392	0	0	8.88536	0	0	0	0
New Deal Next Phase	Hampshire and Isle of Wight	0	1.6	15.94	8		South	0	0	0	1	706	415	0.2	11.11	2	0	0			8	0	0	2.75248	0	0	4.12781	0	0	0	0
New Deal Next Phase	Kent	1	2.2	13.95	20		South	0	0	0	1	1380	374	0.4	9.63	2	0	0			9	0	0	1.26168	0	0	5.66978	0	0	0	0
New Deal Next Phase	Leicestershire, Rutland and Northamptonshire	0	2.5	14.35	18		Midlands	0	1	0	0	706	490	0.1	9.88	3	0	0			14	0	0	2.51518	0	0	4.81174	0	0	0	0
New Deal Next Phase	London (Brent, Harrow and Hillingdon)	0	3.5	12.54	32		London	0	0	1	0	900	21	4.3	4.681	1	0	0			39	0	0	2.62551	0	0	7.93207	0	0	0	0
New Deal Next Phase	London (Central)	0	3.6	11	38		London	0	0	1	0	1879	7	26.8	5.527	3	0	0			29	0	0	3.56432	0	0	9.81907	0	0	0	0
New Deal Next Phase	London (City and East)	0	7.3	12.76	29		London	0	0	1	0	1179	8	14.7	4.534	5	0	0			43	0	0	2.74151	0	0	23.7583	0	0	0	0
New Deal Next Phase	London (Lambeth, Southwark and Wandsworth)	0	4.3	10.44	39		London	0	0	1	0	1354	9	15	5.698	2	0	0			29	0	0	4.48403	0	0	14.0347	0	0	0	0
New Deal Next Phase	London (North East)	0	3.8	12.56	31		London	0	0	1	0	834	24	3.5	5.397	3	0	0			31	0	0	3.81323	0	0	7.99333	0	0	0	0
New Deal Next Phase	London (North)	0	4.5	12.29	34		London	0	0	1	0	1687	20	8.4	5.391	2	0	0			31	0	0	5.76145	0	0	15.4183	0	0	0	0
New Deal Next Phase	London (South East)	0	3.8	17.86	1		London	0	0	1	0	1119	14	8	4.467	3	0	0			26	0	0	3.98702	0	0	14.1639	0	0	0	0
New Deal Next Phase	London (South)	0	2	13.36	26		London	0	0	1	0	1748	41	4.3	8.583	2	0	0			23	0	0	4.71513	0	0	6.48841	0	0	0	0
New Deal Next Phase	London (West)	0	3.3	14.46	16		London	0	0	1	0	781	13	6	4.73	2	0	0			34	0	0	3.64693	0	0	22.2896	0	0	0	0
New Deal Next Phase	Manchester (Central)	1	4	13.1	27		North	1	0	0	0	1084	32	3.4	5.512	2	0	0			18	0	0	2.39478	0	0	9.082	0	0	0	0
New Deal Next Phase	Manchester (East and West)	1	3.1	16.28	5		North	1	0	0	0	1458	96	1.5	10.233	4	0	0			11	0	0	3.41933	0	0	6.24059	0	0	0	0
New Deal Next Phase	Marches	0	2	15.98	7		Midlands	0	1	0	0	1297	741	0.2	7.062	6	0	0			6	0	0	2.18918	0	0	15.6938	0	0	0	0
New Deal Next Phase	Merseyside	1	5.5	11.57	36		North	1	0	0	0	1000	64	1.6	8.258	5	0	0			6	0	0	1.61298	0	0	4.73965	0	0	0	0
New Deal Next Phase	Norfolk	0	2.3	13.55	25		South	0	0	0	1	1061	537	0.2	4.791	1	0	0			7	0	0	0.30683	0	0	11.2169	0	0	0	0
New Deal Next Phase	North East Yorkshire and the Humber	0	2.8	13.99	19		North	1	0	0	0	833	1183	0.1	10.006	3	0	0			7	0	0	2.29562	0	0	2.78133	0	0	0	0
New Deal Next Phase	Northumbria	0	3.1	12.84	28		North	1	0	0	0	1944	542	0.4	6.841	8	0	0			7	0	0	2.70136	0	0	11.0072	0	0	0	0
New Deal Next Phase	Nottinghamshire and Lincolnshire	1	2.7	13.79	23		Midlands	0	1	0	0	2622	808	0.3	10.397	6	0	0			9	0	0	0.89353	0	0	3.2721	0	0	0	0
New Deal Next Phase	South Tyne and Wear Valley	0	4.3	12.64	30		North	1	0	0	0	993	236	0.4	4.802	7	0	0			5	0	0	2.4115	0	0	13.3132	0	0	0	0
New Deal Next Phase	South Yorkshire	1	3.5	14.73	13		North	1	0	0	0	1652	155	1.1	7.845	6	0	0			10	0	0	2.07266	0	0	14.3531	0	0	0	0
New Deal Next Phase	Staffordshire	0	2.2	15.13	11		Midlands	0	1	0	0	656	271	0.2	6.501	1	0	0			7	0	0	1.66897	0	0	6.38517	0	0	0	0
New Deal Next Phase	Surrey and Sussex	1	1.5	13.83	22		South	0	0	0	1	2168	544	0.4	15.376	4	0	0			10	0	0	1.09781	0	0	3.7526	0	0	0	0
New Deal Next Phase	Tees Valley	1	4.8	11.95	35		North	1	0	0	0	1226	79	1.6	3.984	4	0	0			6	0	0	4.10392	0	0	18.6145	0	0	0	0
New Deal Next Phase	Thames Valley (Berks, Bucks, Oxfs)	0	1.4	14.44	17		South	0	0	0	1	1052	574	0.2	13.476	4	0	0			14	0	0	2.68106	0	0	3.32072	0	0	0	0
New Deal Next Phase	West Of England	1	1.7	17.03	3		South	0	0	0	1	1674	133	1.3	6.329	3	0	0			10	0	0	1.83441	0	0	5.71022	0	0	0	0
New Deal Next Phase	West Yorkshire	1	3.3	13.66	24		North	1	0	0	0	2180	203	1.1	13.065	4	0	0			16	0	0	1.41906	0	0	2.33295	0	0	0	0
New Jobseeker's Regime	Bedfordshire and Hertfordshire	0	2	18.4	10	21	South	0	0	0	1	1221	288	0.4	10.06	11	1	1	21	21	15	0	0	1.55467	0	0	3.32505	0	0	10	10
New Jobseeker's Regime	Birmingham and Solihull	0	6.9	11.97	40	10	Midlands	0	1	0	0	1834	45	4.1	7.242	22	1	1	10	10	29	0	0	0.7636	0	0	6.24827	0	0	40	40
New Jobseeker's Regime	Black Country	0	5.4	14.93	33	46	Midlands	0	1	0	0	1636	36	4.5	6.501	14	1	1	46	46	19	0	0	5.12844	0	0	4.99923	0	0	33	33
New Jobseeker's Regime	Cambridgeshire and Suffolk	0	2	15.85	29	8	South	0	0	0	1	1639	719	0.2	8.607	6	1	1	8	8	11	0	0	1.31637	0	0	4.89601	0	0	29	29
New Jobseeker's Regime	Cheshire, Halton and Warrington	0	2.2	19.2	6	43	North	1	0	0	0	1654	234	0.7	6.067	6	1	1	43	43	4	0	0	3.57013	0	0	9.15774	0	0	6	6
New Jobseeker's Regime	Coventry and Warwickshire	0	2.9	14.76	34	9	Midlands	0	1	0	0	734	207	0.4	5.056	10	1	1	9	9	14	0	0	1.17089	0	0	7.97666	0	0	34	34
New Jobseeker's Regime	Cumbria and Lancashire	0	2.3	19.08	7		North	1	0	0	0	1212	984	0.1	11.59	13	1	1			8	0	0	1.22174	0	0	2.47714	0	0	7	7
New Jobseeker's Regime	Derbyshire	0	2.6	17.46	15	6	Midlands	0	1	0	0	825	262	0.3	5.96	8	1	1	6	6	7	0	0	1.04362	0	0	12.0721	0	0	15	15
New Jobseeker's Regime	Devon and Cornwall	0	1.7	18.49	9	20	South	0	0	0	1	684	1027	0.1	9.404	12	1	1	20	20	5	0	0	2.47554	0	0	3.83879	0	0	9	9
New Jobseeker's Regime	Dorset and Somerset	0	1.3	23.01	2	2	South	0	0	0	1	841	610	0.1	6.932	8	1	1	2	2	6	0	0	2.75534	0	0	6.36757	0	0	2	2
New Jobseeker's Regime	Essex	0	2	15.86	28	11	South	0	0	0	1	879	367	0.2	9.899	10	1	1	11	11	10	0	0	1.16173	0	0	3.55793	0	0	28	28
New Jobseeker's Regime	Gloucestershire, Wiltshire and Swindon	0	1.5	15.31	32	3	South	0	0	0	1	847	614	0.1	7.24	5	1	1	3	3	7	0	0	2.09392	0	0	8.88536	0	0	32	32
New Jobseeker's Regime	Hampshire and Isle of Wight	0	1.6	19.27	5	7	South	0	0	0	1	706	415	0.2	11.11	5	1	1	7	7	8	0	0	2.75248	0	0	4.12781	0	0	5	5
New Jobseeker's Regime	Kent	0	2.2	17.62	14	23	South	0	0	0	1	1380	374	0.4	9.63	6	1	1	23	23	9	0	0	1.26168	0	0	5.66978	0	0	14	14
New Jobseeker's Regime	Leicestershire, Rutland and Northamptonshire	0	2.5	16.17	25		Midlands	0	1	0	0	706	490	0.1	9.88	12	1	1			14	0	0	2.51518	0	0	4.81174	0	0	25	25
New Jobseeker's Regime	London (Brent, Harrow and Hillingdon)	0	3.5	15.54	31		London	0	0	1	0	900	21	4.3	4.681	8	1	1			39	0	0	2.62551	0	0	7.93207	0	0	31	31
New Jobseeker's Regime	London (Central)	0	3.6	14.31	35	13	London	0	0	1	0	1879	7	26.8	5.527	13	1	1	13	13	29	0	0	3.56432	0	0	9.81907	0	0	35	35
New Jobseeker's Regime	London (City and East)	0	7.3	13.02	39	17	London	0	0	1	0	1179	8	14.7	4.534	16	1	1	17	17	43	0	0	2.74151	0	0	23.7583	0	0	39	39
New Jobseeker's Regime	London (Lambeth, Southwark and Wandsworth)	1	4.3	13.6	37	27	London	0	0	1	0	1354	9	15	5.698	12	1	1	27	27	29	0	0	4.48403	0	0	14.0347	0	0	37	37
New Jobseeker's Regime	London (North East)	0	3.8	16.6	21		London	0	0	1	0	834	24	3.5	5.397	10	1	1			31	0	0	3.81323	0	0	7.99333	0	0	21	21
New Jobseeker's Regime	London (North)	0	4.5	16.12	26		London	0	0	1	0	1687	20	8.4	5.391	10	1	1			31	0	0	5.76145	0	0	15.4183	0	0	26	26
New Jobseeker's Regime	London (South East)	0	3.8	28.87	1		London	0	0	1	0	1119	14	8	4.467	14	1	1			26	0	0	3.98702	0	0	14.1639	0	0	1	1
New Jobseeker's Regime	London (South)	0	2	19.41	4		London	0	0	1	0	1748	41	4.3	8.583	12	1	1			23	0	0	4.71513	0	0	6.48841	0	0	4	4
New Jobseeker's Regime	London (West)	0	3.3	16.07	27		London	0	0	1	0	781	13	6	4.73	8	1	1			34	0	0	3.64693	0	0	22.2896	0	0	27	27
New Jobseeker's Regime	Manchester (Central)	0	4	16.46	22	42	North	1	0	0	0	1084	32	3.4	5.512	16	1	1	42	42	18	0	0	2.39478	0	0	9.082	0	0	22	22
New Jobseeker's Regime	Manchester (East and West)	0	3.1	17.73	12	37	North	1	0	0	0	1458	96	1.5	10.233	14	1	1	37	37	11	0	0	3.41933	0	0	6.24059	0	0	12	12
New Jobseeker's Regime	Marches	1	2	17.97	11	32	Midlands	0	1	0	0	1297	741	0.2	7.062	11	1	1	32	32	6	0	0	2.18918	0	0	15.6938	0	0	11	11
New Jobseeker's Regime	Merseyside	0	5.5	13.54	38		North	1	0	0	0	1000	64	1.6	8.258	15	1	1			6	0	0	1.61298	0	0	4.73965	0	0	38	38
New Jobseeker's Regime	Norfolk	0	2.3	17.19	18	39	South	0	0	0	1	1061	537	0.2	4.791	5	1	1	39	39	7	0	0	0.30683	0	0	11.2169	0	0	18	18
New Jobseeker's Regime	North East Yorkshire and the Humber	0	2.8	16.23	24	18	North	1	0	0	0	833	1183	0.1	10.006	6	1	1	18	18	7	0	0	2.29562	0	0	2.78133	0	0	24	24
New Jobseeker's Regime	Northumbria	0	3.1	16.24	23	28	North	1	0	0	0	1944	542	0.4	6.841	20	1	1	28	28	7	0	0	2.70136	0	0	11.0072	0	0	23	23
New Jobseeker's Regime	Nottinghamshire and Lincolnshire	0	2.7	17.02	19		Midlands	0	1	0	0	2622	808	0.3	10.397	13	1	1			9	0	0	0.89353	0	0	3.2721	0	0	19	19
New Jobseeker's Regime	South Tyne and Wear Valley	0	4.3	17.02	20	41	North	1	0	0	0	993	236	0.4	4.802	11	1	1	41	41	5	0	0	2.4115	0	0	13.3132	0	0	20	20
New Jobseeker's Regime	South Yorkshire	0	3.5	17.31	17	47	North	1	0	0	0	1652	155	1.1	7.845	14	1	1	47	47	10	0	0	2.07266	0	0	14.3531	0	0	17	17
New Jobseeker's Regime	Staffordshire	0	2.2	20.32	3	36	Midlands	0	1	0	0	656	271	0.2	6.501	5	1	1	36	36	7	0	0	1.66897	0	0	6.38517	0	0	3	3
New Jobseeker's Regime	Surrey and Sussex	0	1.5	15.65	30	5	South	0	0	0	1	2168	544	0.4	15.376	10	1	1	5	5	10	0	0	1.09781	0	0	3.7526	0	0	30	30
New Jobseeker's Regime	Tees Valley	0	4.8	13.63	36	29	North	1	0	0	0	1226	79	1.6	3.984	9	1	1	29	29	6	0	0	4.10392	0	0	18.6145	0	0	36	36
New Jobseeker's Regime	Thames Valley (Berks, Bucks, Oxfs)	0	1.4	17.46	16	14	South	0	0	0	1	1052	574	0.2	13.476	11	1	1	14	14	14	0	0	2.68106	0	0	3.32072	0	0	16	16
New Jobseeker's Regime	West Of England	0	1.7	18.84	8	1	South	0	0	0	1	1674	133	1.3	6.329	8	1	1	1	1	10	0	0	1.83441	0	0	5.71022	0	0	8	8
New Jobseeker's Regime	West Yorkshire	0	3.3	17.7	13	33	North	1	0	0	0	2180	203	1.1	13.065	19	1	1	33	33	16	0	0	1.41906	0	0	2.33295	0	0	13	13
Next Steps Test Bed	Bedfordshire and Hertfordshire	1	2	18.4	10	21	South	0	0	0	1	1221	288	0.4	10.06	9	0	0	0	0	15	0	0	1.55467	0	0	3.32505	0	0	0	0
Next Steps Test Bed	Birmingham and Solihull	1	6.9	11.97	40	10	Midlands	0	1	0	0	1834	45	4.1	7.242	19	0	0	0	0	29	0	0	0.7636	0	0	6.24827	0	0	0	0
Next Steps Test Bed	Black Country	0	5.4	14.93	33	46	Midlands	0	1	0	0	1636	36	4.5	6.501	14	0	0	0	0	19	0	0	5.12844	0	0	4.99923	0	0	0	0
Next Steps Test Bed	Cambridgeshire and Suffolk	1	2	15.85	29	8	South	0	0	0	1	1639	719	0.2	8.607	5	0	0	0	0	11	0	0	1.31637	0	0	4.89601	0	0	0	0
Next Steps Test Bed	Cheshire, Halton and Warrington	0	2.2	19.2	6	43	North	1	0	0	0	1654	234	0.7	6.067	6	0	0	0	0	4	0	0	3.57013	0	0	9.15774	0	0	0	0
Next Steps Test Bed	Coventry and Warwickshire	1	2.9	14.76	34	9	Midlands	0	1	0	0	734	207	0.4	5.056	9	0	0	0	0	14	0	0	1.17089	0	0	7.97666	0	0	0	0
Next Steps Test Bed	Cumbria and Lancashire	0	2.3	19.08	7		North	1	0	0	0	1212	984	0.1	11.59	13	0	0			8	0	0	1.22174	0	0	2.47714	0	0	0	0
Next Steps Test Bed	Derbyshire	0	2.6	17.46	15	6	Midlands	0	1	0	0	825	262	0.3	5.96	8	0	0	0	0	7	0	0	1.04362	0	0	12.0721	0	0	0	0
Next Steps Test Bed	Devon and Cornwall	0	1.7	18.49	9	20	South	0	0	0	1	684	1027	0.1	9.404	12	0	0	0	0	5	0	0	2.47554	0	0	3.83879	0	0	0	0
Next Steps Test Bed	Dorset and Somerset	0	1.3	23.01	2	2	South	0	0	0	1	841	610	0.1	6.932	8	0	0	0	0	6	0	0	2.75534	0	0	6.36757	0	0	0	0
Next Steps Test Bed	Essex	1	2	15.86	28	11	South	0	0	0	1	879	367	0.2	9.899	9	0	0	0	0	10	0	0	1.16173	0	0	3.55793	0	0	0	0
Next Steps Test Bed	Gloucestershire, Wiltshire and Swindon	0	1.5	15.31	32	3	South	0	0	0	1	847	614	0.1	7.24	5	0	0	0	0	7	0	0	2.09392	0	0	8.88536	0	0	0	0
Next Steps Test Bed	Hampshire and Isle of Wight	0	1.6	19.27	5	7	South	0	0	0	1	706	415	0.2	11.11	5	0	0	0	0	8	0	0	2.75248	0	0	4.12781	0	0	0	0
Next Steps Test Bed	Kent	0	2.2	17.62	14	23	South	0	0	0	1	1380	374	0.4	9.63	6	0	0	0	0	9	0	0	1.26168	0	0	5.66978	0	0	0	0
Next Steps Test Bed	Leicestershire, Rutland and Northamptonshire	0	2.5	16.17	25		Midlands	0	1	0	0	706	490	0.1	9.88	12	0	0			14	0	0	2.51518	0	0	4.81174	0	0	0	0
Next Steps Test Bed	London (Brent, Harrow and Hillingdon)	0	3.5	15.54	31		London	0	0	1	0	900	21	4.3	4.681	8	0	0			39	0	0	2.62551	0	0	7.93207	0	0	0	0
Next Steps Test Bed	London (Central)	0	3.6	14.31	35	13	London	0	0	1	0	1879	7	26.8	5.527	13	0	0	0	0	29	0	0	3.56432	0	0	9.81907	0	0	0	0
Next Steps Test Bed	London (City and East)	0	7.3	13.02	39	17	London	0	0	1	0	1179	8	14.7	4.534	16	0	0	0	0	43	0	0	2.74151	0	0	23.7583	0	0	0	0
Next Steps Test Bed	London (Lambeth, Southwark and Wandsworth)	0	4.3	13.6	37	27	London	0	0	1	0	1354	9	15	5.698	12	0	0	0	0	29	0	0	4.48403	0	0	14.0347	0	0	0	0
Next Steps Test Bed	London (North East)	0	3.8	16.6	21		London	0	0	1	0	834	24	3.5	5.397	9	0	0			31	0	0	3.81323	0	0	7.99333	0	0	0	0
Next Steps Test Bed	London (North)	0	4.5	16.12	26		London	0	0	1	0	1687	20	8.4	5.391	9	0	0			31	0	0	5.76145	0	0	15.4183	0	0	0	0
Next Steps Test Bed	London (South East)	0	3.8	28.87	1		London	0	0	1	0	1119	14	8	4.467	14	0	0			26	0	0	3.98702	0	0	14.1639	0	0	0	0
Next Steps Test Bed	London (South)	0	2	19.41	4		London	0	0	1	0	1748	41	4.3	8.583	12	0	0			23	0	0	4.71513	0	0	6.48841	0	0	0	0
Next Steps Test Bed	London (West)	0	3.3	16.07	27		London	0	0	1	0	781	13	6	4.73	8	0	0			34	0	0	3.64693	0	0	22.2896	0	0	0	0
Next Steps Test Bed	Manchester (Central)	0	4	16.46	22	42	North	1	0	0	0	1084	32	3.4	5.512	16	0	0	0	0	18	0	0	2.39478	0	0	9.082	0	0	0	0
Next Steps Test Bed	Manchester (East and West)	0	3.1	17.73	12	37	North	1	0	0	0	1458	96	1.5	10.233	14	0	0	0	0	11	0	0	3.41933	0	0	6.24059	0	0	0	0
Next Steps Test Bed	Marches	1	2	17.97	11	32	Midlands	0	1	0	0	1297	741	0.2	7.062	10	0	0	0	0	6	0	0	2.18918	0	0	15.6938	0	0	0	0
Next Steps Test Bed	Merseyside	0	5.5	13.54	38		North	1	0	0	0	1000	64	1.6	8.258	14	0	0			6	0	0	1.61298	0	0	4.73965	0	0	0	0
Next Steps Test Bed	Norfolk	1	2.3	17.19	18	39	South	0	0	0	1	1061	537	0.2	4.791	4	0	0	0	0	7	0	0	0.30683	0	0	11.2169	0	0	0	0
Next Steps Test Bed	North East Yorkshire and the Humber	0	2.8	16.23	24	18	North	1	0	0	0	833	1183	0.1	10.006	5	0	0	0	0	7	0	0	2.29562	0	0	2.78133	0	0	0	0
Next Steps Test Bed	Northumbria	0	3.1	16.24	23	28	North	1	0	0	0	1944	542	0.4	6.841	20	0	0	0	0	7	0	0	2.70136	0	0	11.0072	0	0	0	0
Next Steps Test Bed	Nottinghamshire and Lincolnshire	0	2.7	17.02	19		Midlands	0	1	0	0	2622	808	0.3	10.397	13	0	0			9	0	0	0.89353	0	0	3.2721	0	0	0	0
Next Steps Test Bed	South Tyne and Wear Valley	0	4.3	17.02	20	41	North	1	0	0	0	993	236	0.4	4.802	11	0	0	0	0	5	0	0	2.4115	0	0	13.3132	0	0	0	0
Next Steps Test Bed	South Yorkshire	0	3.5	17.31	17	47	North	1	0	0	0	1652	155	1.1	7.845	14	0	0	0	0	10	0	0	2.07266	0	0	14.3531	0	0	0	0
Next Steps Test Bed	Staffordshire	1	2.2	20.32	3	36	Midlands	0	1	0	0	656	271	0.2	6.501	4	0	0	0	0	7	0	0	1.66897	0	0	6.38517	0	0	0	0
Next Steps Test Bed	Surrey and Sussex	0	1.5	15.65	30	5	South	0	0	0	1	2168	544	0.4	15.376	10	0	0	0	0	10	0	0	1.09781	0	0	3.7526	0	0	0	0
Next Steps Test Bed	Tees Valley	0	4.8	13.63	36	29	North	1	0	0	0	1226	79	1.6	3.984	9	0	0	0	0	6	0	0	4.10392	0	0	18.6145	0	0	0	0
Next Steps Test Bed	Thames Valley (Berks, Bucks, Oxfs)	0	1.4	17.46	16	14	South	0	0	0	1	1052	574	0.2	13.476	10	0	0	0	0	14	0	0	2.68106	0	0	3.32072	0	0	0	0
Next Steps Test Bed	West Of England	0	1.7	18.84	8	1	South	0	0	0	1	1674	133	1.3	6.329	8	0	0	0	0	10	0	0	1.83441	0	0	5.71022	0	0	0	0
Next Steps Test Bed	West Yorkshire	0	3.3	17.7	13	33	North	1	0	0	0	2180	203	1.1	13.065	19	0	0	0	0	16	0	0	1.41906	0	0	2.33295	0	0	0	0
Northern Region Call Centre Pilot	Bedfordshire and Hertfordshire	0	2	15.25	8		South	0	0	0	1	1221	288	0.4	10.06	2	0	1			15	0	0	1.55467	0	0	3.32505	0	0	0	8
Northern Region Call Centre Pilot	Birmingham and Solihull	0	6.9	9.7	39		Midlands	0	1	0	0	1834	45	4.1	7.242	2	0	1			29	0	0	0.7636	0	0	6.24827	0	0	0	39
Northern Region Call Centre Pilot	Black Country	0	5.4	13.68	21		Midlands	0	1	0	0	1636	36	4.5	6.501	2	0	1			19	0	0	5.12844	0	0	4.99923	0	0	0	21
Northern Region Call Centre Pilot	Cambridgeshire and Suffolk	0	2	14.25	16		South	0	0	0	1	1639	719	0.2	8.607	2	0	1			11	0	0	1.31637	0	0	4.89601	0	0	0	16
Northern Region Call Centre Pilot	Cheshire, Halton and Warrington	0	2.2	15.96	4		North	1	0	0	0	1654	234	0.7	6.067	2	0	1			4	0	0	3.57013	0	0	9.15774	0	0	0	4
Northern Region Call Centre Pilot	Coventry and Warwickshire	0	2.9	12.26	31		Midlands	0	1	0	0	734	207	0.4	5.056	3	0	1			14	0	0	1.17089	0	0	7.97666	0	0	0	31
Northern Region Call Centre Pilot	Cumbria and Lancashire	0	2.3	15.38	7		North	1	0	0	0	1212	984	0.1	11.59	3	0	1			8	0	0	1.22174	0	0	2.47714	0	0	0	7
Northern Region Call Centre Pilot	Derbyshire	0	2.6	14.61	13		Midlands	0	1	0	0	825	262	0.3	5.96	2	0	1			7	0	0	1.04362	0	0	12.0721	0	0	0	13
Northern Region Call Centre Pilot	Devon and Cornwall	0	1.7	13.82	20		South	0	0	0	1	684	1027	0.1	9.404	5	0	1			5	0	0	2.47554	0	0	3.83879	0	0	0	20
Northern Region Call Centre Pilot	Dorset and Somerset	0	1.3	13.63	22		South	0	0	0	1	841	610	0.1	6.932	1	0	1			6	0	0	2.75534	0	0	6.36757	0	0	0	22
Northern Region Call Centre Pilot	Essex	0	2	13.47	24		South	0	0	0	1	879	367	0.2	9.899	2	0	1			10	0	0	1.16173	0	0	3.55793	0	0	0	24
Northern Region Call Centre Pilot	Gloucestershire, Wiltshire and Swindon	0	1.5	14.82	12		South	0	0	0	1	847	614	0.1	7.24	2	0	1			7	0	0	2.09392	0	0	8.88536	0	0	0	12
Northern Region Call Centre Pilot	Hampshire and Isle of Wight	0	1.6	14.38	14		South	0	0	0	1	706	415	0.2	11.11	2	0	1			8	0	0	2.75248	0	0	4.12781	0	0	0	14
Northern Region Call Centre Pilot	Kent	0	2.2	13.6	23		South	0	0	0	1	1380	374	0.4	9.63	1	0	1			9	0	0	1.26168	0	0	5.66978	0	0	0	23
Northern Region Call Centre Pilot	Leicestershire, Rutland and Northamptonshire	0	2.5	15.62	6		Midlands	0	1	0	0	706	490	0.1	9.88	3	0	1			14	0	0	2.51518	0	0	4.81174	0	0	0	6
Northern Region Call Centre Pilot	London (Brent, Harrow and Hillingdon)	0	3.5	12.05	33		London	0	0	1	0	900	21	4.3	4.681	1	0	1			39	0	0	2.62551	0	0	7.93207	0	0	0	33
Northern Region Call Centre Pilot	London (Central)	0	3.6	9.38	40		London	0	0	1	0	1879	7	26.8	5.527	3	0	1			29	0	0	3.56432	0	0	9.81907	0	0	0	40
Northern Region Call Centre Pilot	London (City and East)	0	7.3	12.26	32		London	0	0	1	0	1179	8	14.7	4.534	3	0	1			43	0	0	2.74151	0	0	23.7583	0	0	0	32
Northern Region Call Centre Pilot	London (Lambeth, Southwark and Wandsworth)	0	4.3	11.19	35		London	0	0	1	0	1354	9	15	5.698	2	0	1			29	0	0	4.48403	0	0	14.0347	0	0	0	35
Northern Region Call Centre Pilot	London (North East)	0	3.8	14.38	15		London	0	0	1	0	834	24	3.5	5.397	1	0	1			31	0	0	3.81323	0	0	7.99333	0	0	0	15
Northern Region Call Centre Pilot	London (North)	0	4.5	10.07	38		London	0	0	1	0	1687	20	8.4	5.391	1	0	1			31	0	0	5.76145	0	0	15.4183	0	0	0	38
Northern Region Call Centre Pilot	London (South East)	0	3.8	15.03	11		London	0	0	1	0	1119	14	8	4.467	3	0	1			26	0	0	3.98702	0	0	14.1639	0	0	0	11
Northern Region Call Centre Pilot	London (South)	0	2	12.6	29		London	0	0	1	0	1748	41	4.3	8.583	2	0	1			23	0	0	4.71513	0	0	6.48841	0	0	0	29
Northern Region Call Centre Pilot	London (West)	0	3.3	12.4	30		London	0	0	1	0	781	13	6	4.73	2	0	1			34	0	0	3.64693	0	0	22.2896	0	0	0	30
Northern Region Call Centre Pilot	Manchester (Central)	0	4	12.88	28		North	1	0	0	0	1084	32	3.4	5.512	1	0	1			18	0	0	2.39478	0	0	9.082	0	0	0	28
Northern Region Call Centre Pilot	Manchester (East and West)	0	3.1	16.94	2		North	1	0	0	0	1458	96	1.5	10.233	4	0	1			11	0	0	3.41933	0	0	6.24059	0	0	0	2
Northern Region Call Centre Pilot	Marches	0	2	15.72	5		Midlands	0	1	0	0	1297	741	0.2	7.062	4	0	1			6	0	0	2.18918	0	0	15.6938	0	0	0	5
Northern Region Call Centre Pilot	Merseyside	0	5.5	11.44	34		North	1	0	0	0	1000	64	1.6	8.258	3	0	1			6	0	0	1.61298	0	0	4.73965	0	0	0	34
Northern Region Call Centre Pilot	Norfolk	0	2.3	13.26	25		South	0	0	0	1	1061	537	0.2	4.791	0	0	1			7	0	0	0.30683	0	0	11.2169	0	0	0	25
Northern Region Call Centre Pilot	North East Yorkshire and the Humber	0	2.8	13.12	26		North	1	0	0	0	833	1183	0.1	10.006	1	0	1			7	0	0	2.29562	0	0	2.78133	0	0	0	26
Northern Region Call Centre Pilot	Northumbria	1	3.1	10.31	37		North	1	0	0	0	1944	542	0.4	6.841	5	0	1			7	0	0	2.70136	0	0	11.0072	0	0	0	37
Northern Region Call Centre Pilot	Nottinghamshire and Lincolnshire	0	2.7	14.05	17		Midlands	0	1	0	0	2622	808	0.3	10.397	2	0	1			9	0	0	0.89353	0	0	3.2721	0	0	0	17
Northern Region Call Centre Pilot	South Tyne and Wear Valley	1	4.3	17.82	1		North	1	0	0	0	993	236	0.4	4.802	1	0	1			5	0	0	2.4115	0	0	13.3132	0	0	0	1
Northern Region Call Centre Pilot	South Yorkshire	0	3.5	12.91	27		North	1	0	0	0	1652	155	1.1	7.845	4	0	1			10	0	0	2.07266	0	0	14.3531	0	0	0	27
Northern Region Call Centre Pilot	Staffordshire	0	2.2	15.23	9		Midlands	0	1	0	0	656	271	0.2	6.501	1	0	1			7	0	0	1.66897	0	0	6.38517	0	0	0	9
Northern Region Call Centre Pilot	Surrey and Sussex	0	1.5	13.98	18		South	0	0	0	1	2168	544	0.4	15.376	4	0	1			10	0	0	1.09781	0	0	3.7526	0	0	0	18
Northern Region Call Centre Pilot	Tees Valley	1	4.8	11.13	36		North	1	0	0	0	1226	79	1.6	3.984	3	0	1			6	0	0	4.10392	0	0	18.6145	0	0	0	36
Northern Region Call Centre Pilot	Thames Valley (Berks, Bucks, Oxfs)	0	1.4	15.12	10		South	0	0	0	1	1052	574	0.2	13.476	1	0	1			14	0	0	2.68106	0	0	3.32072	0	0	0	10
Northern Region Call Centre Pilot	West Of England	0	1.7	16.52	3		South	0	0	0	1	1674	133	1.3	6.329	3	0	1			10	0	0	1.83441	0	0	5.71022	0	0	0	3
Northern Region Call Centre Pilot	West Yorkshire	0	3.3	13.86	19		North	1	0	0	0	2180	203	1.1	13.065	2	0	1			16	0	0	1.41906	0	0	2.33295	0	0	0	19
Occupational Skills Pilots	Bedfordshire and Hertfordshire	0	2	14.79	13		South	0	0	0	1	1221	288	0.4	10.06		0	1			15	0	0	1.55467	0	0	3.32505	0	0	0	13
Occupational Skills Pilots	Birmingham and Solihull	0	6.9	9.84	40		Midlands	0	1	0	0	1834	45	4.1	7.242		0	1			29	0	0	0.7636	0	0	6.24827	0	0	0	40
Occupational Skills Pilots	Black Country	0	5.4	11.66	36		Midlands	0	1	0	0	1636	36	4.5	6.501		0	1			19	0	0	5.12844	0	0	4.99923	0	0	0	36
Occupational Skills Pilots	Cambridgeshire and Suffolk	0	2	14.27	16		South	0	0	0	1	1639	719	0.2	8.607		0	1			11	0	0	1.31637	0	0	4.89601	0	0	0	16
Occupational Skills Pilots	Cheshire, Halton and Warrington	0	2.2	15.86	5		North	1	0	0	0	1654	234	0.7	6.067		0	1			4	0	0	3.57013	0	0	9.15774	0	0	0	5
Occupational Skills Pilots	Coventry and Warwickshire	0	2.9	13.03	26		Midlands	0	1	0	0	734	207	0.4	5.056		0	1			14	0	0	1.17089	0	0	7.97666	0	0	0	26
Occupational Skills Pilots	Cumbria and Lancashire	0	2.3	16.41	3		North	1	0	0	0	1212	984	0.1	11.59		0	1			8	0	0	1.22174	0	0	2.47714	0	0	0	3
Occupational Skills Pilots	Derbyshire	1	2.6	13.81	20		Midlands	0	1	0	0	825	262	0.3	5.96		0	1			7	0	0	1.04362	0	0	12.0721	0	0	0	20
Occupational Skills Pilots	Devon and Cornwall	0	1.7	15.52	7		South	0	0	0	1	684	1027	0.1	9.404		0	1			5	0	0	2.47554	0	0	3.83879	0	0	0	7
Occupational Skills Pilots	Dorset and Somerset	0	1.3	15.43	8		South	0	0	0	1	841	610	0.1	6.932		0	1			6	0	0	2.75534	0	0	6.36757	0	0	0	8
Occupational Skills Pilots	Essex	0	2	14.05	19		South	0	0	0	1	879	367	0.2	9.899		0	1			10	0	0	1.16173	0	0	3.55793	0	0	0	19
Occupational Skills Pilots	Gloucestershire, Wiltshire and Swindon	0	1.5	14.24	17		South	0	0	0	1	847	614	0.1	7.24		0	1			7	0	0	2.09392	0	0	8.88536	0	0	0	17
Occupational Skills Pilots	Hampshire and Isle of Wight	0	1.6	14.41	15		South	0	0	0	1	706	415	0.2	11.11		0	1			8	0	0	2.75248	0	0	4.12781	0	0	0	15
Occupational Skills Pilots	Kent	0	2.2	14.09	18		South	0	0	0	1	1380	374	0.4	9.63		0	1			9	0	0	1.26168	0	0	5.66978	0	0	0	18
Occupational Skills Pilots	Leicestershire, Rutland and Northamptonshire	0	2.5	14.86	10		Midlands	0	1	0	0	706	490	0.1	9.88		0	1			14	0	0	2.51518	0	0	4.81174	0	0	0	10
Occupational Skills Pilots	London (Brent, Harrow and Hillingdon)	0	3.5	12.02	33		London	0	0	1	0	900	21	4.3	4.681		0	1			39	0	0	2.62551	0	0	7.93207	0	0	0	33
Occupational Skills Pilots	London (Central)	0	3.6	10.24	39		London	0	0	1	0	1879	7	26.8	5.527		0	1			29	0	0	3.56432	0	0	9.81907	0	0	0	39
Occupational Skills Pilots	London (City and East)	0	7.3	12.08	32		London	0	0	1	0	1179	8	14.7	4.534		0	1			43	0	0	2.74151	0	0	23.7583	0	0	0	32
Occupational Skills Pilots	London (Lambeth, Southwark and Wandsworth)	0	4.3	10.72	37		London	0	0	1	0	1354	9	15	5.698		0	1			29	0	0	4.48403	0	0	14.0347	0	0	0	37
Occupational Skills Pilots	London (North East)	0	3.8	12.19	30		London	0	0	1	0	834	24	3.5	5.397		0	1			31	0	0	3.81323	0	0	7.99333	0	0	0	30
Occupational Skills Pilots	London (North)	0	4.5	10.6	38		London	0	0	1	0	1687	20	8.4	5.391		0	1			31	0	0	5.76145	0	0	15.4183	0	0	0	38
Occupational Skills Pilots	London (South East)	0	3.8	16.72	1		London	0	0	1	0	1119	14	8	4.467		0	1			26	0	0	3.98702	0	0	14.1639	0	0	0	1
Occupational Skills Pilots	London (South)	0	2	12.5	28		London	0	0	1	0	1748	41	4.3	8.583		0	1			23	0	0	4.71513	0	0	6.48841	0	0	0	28
Occupational Skills Pilots	London (West)	0	3.3	13.05	25		London	0	0	1	0	781	13	6	4.73		0	1			34	0	0	3.64693	0	0	22.2896	0	0	0	25
Occupational Skills Pilots	Manchester (Central)	0	4	12.32	29		North	1	0	0	0	1084	32	3.4	5.512		0	1			18	0	0	2.39478	0	0	9.082	0	0	0	29
Occupational Skills Pilots	Manchester (East and West)	0	3.1	16.32	4		North	1	0	0	0	1458	96	1.5	10.233		0	1			11	0	0	3.41933	0	0	6.24059	0	0	0	4
Occupational Skills Pilots	Marches	0	2	16.54	2		Midlands	0	1	0	0	1297	741	0.2	7.062		0	1			6	0	0	2.18918	0	0	15.6938	0	0	0	2
Occupational Skills Pilots	Merseyside	0	5.5	11.81	34		North	1	0	0	0	1000	64	1.6	8.258		0	1			6	0	0	1.61298	0	0	4.73965	0	0	0	34
Occupational Skills Pilots	Norfolk	0	2.3	13.02	27		South	0	0	0	1	1061	537	0.2	4.791		0	1			7	0	0	0.30683	0	0	11.2169	0	0	0	27
Occupational Skills Pilots	North East Yorkshire and the Humber	1	2.8	14.81	11		North	1	0	0	0	833	1183	0.1	10.006		0	1			7	0	0	2.29562	0	0	2.78133	0	0	0	11
Occupational Skills Pilots	Northumbria	1	3.1	11.68	35		North	1	0	0	0	1944	542	0.4	6.841		0	1			7	0	0	2.70136	0	0	11.0072	0	0	0	35
Occupational Skills Pilots	Nottinghamshire and Lincolnshire	0	2.7	13.32	23		Midlands	0	1	0	0	2622	808	0.3	10.397		0	1			9	0	0	0.89353	0	0	3.2721	0	0	0	23
Occupational Skills Pilots	South Tyne and Wear Valley	0	4.3	15.27	9		North	1	0	0	0	993	236	0.4	4.802		0	1			5	0	0	2.4115	0	0	13.3132	0	0	0	9
Occupational Skills Pilots	South Yorkshire	0	3.5	13.73	22		North	1	0	0	0	1652	155	1.1	7.845		0	1			10	0	0	2.07266	0	0	14.3531	0	0	0	22
Occupational Skills Pilots	Staffordshire	0	2.2	14.8	12		Midlands	0	1	0	0	656	271	0.2	6.501		0	1			7	0	0	1.66897	0	0	6.38517	0	0	0	12
Occupational Skills Pilots	Surrey and Sussex	0	1.5	13.31	24		South	0	0	0	1	2168	544	0.4	15.376		0	1			10	0	0	1.09781	0	0	3.7526	0	0	0	24
Occupational Skills Pilots	Tees Valley	0	4.8	12.12	31		North	1	0	0	0	1226	79	1.6	3.984		0	1			6	0	0	4.10392	0	0	18.6145	0	0	0	31
Occupational Skills Pilots	Thames Valley (Berks, Bucks, Oxfs)	0	1.4	14.53	14		South	0	0	0	1	1052	574	0.2	13.476		0	1			14	0	0	2.68106	0	0	3.32072	0	0	0	14
Occupational Skills Pilots	West Of England	0	1.7	15.78	6		South	0	0	0	1	1674	133	1.3	6.329		0	1			10	0	0	1.83441	0	0	5.71022	0	0	0	6
Occupational Skills Pilots	West Yorkshire	0	3.3	13.8	21		North	1	0	0	0	2180	203	1.1	13.065		0	1			16	0	0	1.41906	0	0	2.33295	0	0	0	21
ONE	Bedfordshire and Hertfordshire	0	2	15.25	8		South	0	0	0	1	1221	288	0.4	10.06	2	0	1			15	0	0	1.55467	0	0	3.32505	0	0	0	8
ONE	Birmingham and Solihull	0	6.9	9.7	39		Midlands	0	1	0	0	1834	45	4.1	7.242	3	0	1			29	0	0	0.7636	0	0	6.24827	0	0	0	39
ONE	Black Country	0	5.4	13.68	21		Midlands	0	1	0	0	1636	36	4.5	6.501	2	0	1			19	0	0	5.12844	0	0	4.99923	0	0	0	21
ONE	Cambridgeshire and Suffolk	1	2	14.25	16		South	0	0	0	1	1639	719	0.2	8.607	2	0	1			11	0	0	1.31637	0	0	4.89601	0	0	0	16
ONE	Cheshire, Halton and Warrington	1	2.2	15.96	4		North	1	0	0	0	1654	234	0.7	6.067	2	0	1			4	0	0	3.57013	0	0	9.15774	0	0	0	4
ONE	Coventry and Warwickshire	1	2.9	12.26	31		Midlands	0	1	0	0	734	207	0.4	5.056	3	0	1			14	0	0	1.17089	0	0	7.97666	0	0	0	31
ONE	Cumbria and Lancashire	0	2.3	15.38	7		North	1	0	0	0	1212	984	0.1	11.59	3	0	1			8	0	0	1.22174	0	0	2.47714	0	0	0	7
ONE	Derbyshire	0	2.6	14.61	13		Midlands	0	1	0	0	825	262	0.3	5.96	2	0	1			7	0	0	1.04362	0	0	12.0721	0	0	0	13
ONE	Devon and Cornwall	0	1.7	13.82	20		South	0	0	0	1	684	1027	0.1	9.404	5	0	1			5	0	0	2.47554	0	0	3.83879	0	0	0	20
ONE	Dorset and Somerset	1	1.3	13.63	22		South	0	0	0	1	841	610	0.1	6.932	1	0	1			6	0	0	2.75534	0	0	6.36757	0	0	0	22
ONE	Essex	1	2	13.47	24		South	0	0	0	1	879	367	0.2	9.899	2	0	1			10	0	0	1.16173	0	0	3.55793	0	0	0	24
ONE	Gloucestershire, Wiltshire and Swindon	0	1.5	14.82	12		South	0	0	0	1	847	614	0.1	7.24	2	0	1			7	0	0	2.09392	0	0	8.88536	0	0	0	12
ONE	Hampshire and Isle of Wight	0	1.6	14.38	14		South	0	0	0	1	706	415	0.2	11.11	2	0	1			8	0	0	2.75248	0	0	4.12781	0	0	0	14
ONE	Kent	0	2.2	13.6	23		South	0	0	0	1	1380	374	0.4	9.63	1	0	1			9	0	0	1.26168	0	0	5.66978	0	0	0	23
ONE	Leicestershire, Rutland and Northamptonshire	0	2.5	15.62	6		Midlands	0	1	0	0	706	490	0.1	9.88	3	0	1			14	0	0	2.51518	0	0	4.81174	0	0	0	6
ONE	London (Brent, Harrow and Hillingdon)	0	3.5	12.05	33		London	0	0	1	0	900	21	4.3	4.681	1	0	1			39	0	0	2.62551	0	0	7.93207	0	0	0	33
ONE	London (Central)	0	3.6	9.38	40		London	0	0	1	0	1879	7	26.8	5.527	3	0	1			29	0	0	3.56432	0	0	9.81907	0	0	0	40
ONE	London (City and East)	0	7.3	12.26	32		London	0	0	1	0	1179	8	14.7	4.534	4	0	1			43	0	0	2.74151	0	0	23.7583	0	0	0	32
ONE	London (Lambeth, Southwark and Wandsworth)	0	4.3	11.19	35		London	0	0	1	0	1354	9	15	5.698	2	0	1			29	0	0	4.48403	0	0	14.0347	0	0	0	35
ONE	London (North East)	1	3.8	14.38	15		London	0	0	1	0	834	24	3.5	5.397	2	0	1			31	0	0	3.81323	0	0	7.99333	0	0	0	15
ONE	London (North)	0	4.5	10.07	38		London	0	0	1	0	1687	20	8.4	5.391	1	0	1			31	0	0	5.76145	0	0	15.4183	0	0	0	38
ONE	London (South East)	0	3.8	15.03	11		London	0	0	1	0	1119	14	8	4.467	3	0	1			26	0	0	3.98702	0	0	14.1639	0	0	0	11
ONE	London (South)	0	2	12.6	29		London	0	0	1	0	1748	41	4.3	8.583	2	0	1			23	0	0	4.71513	0	0	6.48841	0	0	0	29
ONE	London (West)	0	3.3	12.4	30		London	0	0	1	0	781	13	6	4.73	2	0	1			34	0	0	3.64693	0	0	22.2896	0	0	0	30
ONE	Manchester (Central)	0	4	12.88	28		North	1	0	0	0	1084	32	3.4	5.512	1	0	1			18	0	0	2.39478	0	0	9.082	0	0	0	28
ONE	Manchester (East and West)	0	3.1	16.94	2		North	1	0	0	0	1458	96	1.5	10.233	4	0	1			11	0	0	3.41933	0	0	6.24059	0	0	0	2
ONE	Marches	0	2	15.72	5		Midlands	0	1	0	0	1297	741	0.2	7.062	4	0	1			6	0	0	2.18918	0	0	15.6938	0	0	0	5
ONE	Merseyside	0	5.5	11.44	34		North	1	0	0	0	1000	64	1.6	8.258	3	0	1			6	0	0	1.61298	0	0	4.73965	0	0	0	34
ONE	Norfolk	0	2.3	13.26	25		South	0	0	0	1	1061	537	0.2	4.791	1	0	1			7	0	0	0.30683	0	0	11.2169	0	0	0	25
ONE	North East Yorkshire and the Humber	0	2.8	13.12	26		North	1	0	0	0	833	1183	0.1	10.006	1	0	1			7	0	0	2.29562	0	0	2.78133	0	0	0	26
ONE	Northumbria	0	3.1	10.31	37		North	1	0	0	0	1944	542	0.4	6.841	6	0	1			7	0	0	2.70136	0	0	11.0072	0	0	0	37
ONE	Nottinghamshire and Lincolnshire	1	2.7	14.05	17		Midlands	0	1	0	0	2622	808	0.3	10.397	3	0	1			9	0	0	0.89353	0	0	3.2721	0	0	0	17
ONE	South Tyne and Wear Valley	0	4.3	17.82	1		North	1	0	0	0	993	236	0.4	4.802	2	0	1			5	0	0	2.4115	0	0	13.3132	0	0	0	1
ONE	South Yorkshire	0	3.5	12.91	27		North	1	0	0	0	1652	155	1.1	7.845	5	0	1			10	0	0	2.07266	0	0	14.3531	0	0	0	27
ONE	Staffordshire	0	2.2	15.23	9		Midlands	0	1	0	0	656	271	0.2	6.501	1	0	1			7	0	0	1.66897	0	0	6.38517	0	0	0	9
ONE	Surrey and Sussex	0	1.5	13.98	18		South	0	0	0	1	2168	544	0.4	15.376	4	0	1			10	0	0	1.09781	0	0	3.7526	0	0	0	18
ONE	Tees Valley	0	4.8	11.13	36		North	1	0	0	0	1226	79	1.6	3.984	4	0	1			6	0	0	4.10392	0	0	18.6145	0	0	0	36
ONE	Thames Valley (Berks, Bucks, Oxfs)	1	1.4	15.12	10		South	0	0	0	1	1052	574	0.2	13.476	2	0	1			14	0	0	2.68106	0	0	3.32072	0	0	0	10
ONE	West Of England	0	1.7	16.52	3		South	0	0	0	1	1674	133	1.3	6.329	3	0	1			10	0	0	1.83441	0	0	5.71022	0	0	0	3
ONE	West Yorkshire	1	3.3	13.86	19		North	1	0	0	0	2180	203	1.1	13.065	2	0	1			16	0	0	1.41906	0	0	2.33295	0	0	0	19
Open Access Kiosks	Bedfordshire and Hertfordshire	0	2	18.12	7		South	0	0	0	1	1221	288	0.4	10.06	1	0	1			15	0	0	1.55467	0	0	3.32505	0	0	0	7
Open Access Kiosks	Birmingham and Solihull	0	6.9	11.33	39		Midlands	0	1	0	0	1834	45	4.1	7.242	0	0	1			29	0	0	0.7636	0	0	6.24827	0	0	0	39
Open Access Kiosks	Black Country	0	5.4	15.3	22		Midlands	0	1	0	0	1636	36	4.5	6.501	1	0	1			19	0	0	5.12844	0	0	4.99923	0	0	0	22
Open Access Kiosks	Cambridgeshire and Suffolk	0	2	17.45	13		South	0	0	0	1	1639	719	0.2	8.607	1	0	1			11	0	0	1.31637	0	0	4.89601	0	0	0	13
Open Access Kiosks	Cheshire, Halton and Warrington	0	2.2	17.91	9		North	1	0	0	0	1654	234	0.7	6.067	1	0	1			4	0	0	3.57013	0	0	9.15774	0	0	0	9
Open Access Kiosks	Coventry and Warwickshire	0	2.9	14.18	29		Midlands	0	1	0	0	734	207	0.4	5.056	1	0	1			14	0	0	1.17089	0	0	7.97666	0	0	0	29
Open Access Kiosks	Cumbria and Lancashire	0	2.3	17.8	11		North	1	0	0	0	1212	984	0.1	11.59	1	0	1			8	0	0	1.22174	0	0	2.47714	0	0	0	11
Open Access Kiosks	Derbyshire	0	2.6	18.54	4		Midlands	0	1	0	0	825	262	0.3	5.96	1	0	1			7	0	0	1.04362	0	0	12.0721	0	0	0	4
Open Access Kiosks	Devon and Cornwall	0	1.7	14.06	30		South	0	0	0	1	684	1027	0.1	9.404	2	0	1			5	0	0	2.47554	0	0	3.83879	0	0	0	30
Open Access Kiosks	Dorset and Somerset	0	1.3	15.88	20		South	0	0	0	1	841	610	0.1	6.932	0	0	1			6	0	0	2.75534	0	0	6.36757	0	0	0	20
Open Access Kiosks	Essex	0	2	15.78	21		South	0	0	0	1	879	367	0.2	9.899	0	0	1			10	0	0	1.16173	0	0	3.55793	0	0	0	21
Open Access Kiosks	Gloucestershire, Wiltshire and Swindon	1	1.5	17	16		South	0	0	0	1	847	614	0.1	7.24	0	0	1			7	0	0	2.09392	0	0	8.88536	0	0	0	16
Open Access Kiosks	Hampshire and Isle of Wight	0	1.6	16.44	18		South	0	0	0	1	706	415	0.2	11.11	0	0	1			8	0	0	2.75248	0	0	4.12781	0	0	0	18
Open Access Kiosks	Kent	0	2.2	16.25	19		South	0	0	0	1	1380	374	0.4	9.63	0	0	1			9	0	0	1.26168	0	0	5.66978	0	0	0	19
Open Access Kiosks	Leicestershire, Rutland and Northamptonshire	0	2.5	18.37	6		Midlands	0	1	0	0	706	490	0.1	9.88	0	0	1			14	0	0	2.51518	0	0	4.81174	0	0	0	6
Open Access Kiosks	London (Brent, Harrow and Hillingdon)	0	3.5	13.85	32		London	0	0	1	0	900	21	4.3	4.681	0	0	1			39	0	0	2.62551	0	0	7.93207	0	0	0	32
Open Access Kiosks	London (Central)	0	3.6	11.74	37		London	0	0	1	0	1879	7	26.8	5.527	1	0	1			29	0	0	3.56432	0	0	9.81907	0	0	0	37
Open Access Kiosks	London (City and East)	0	7.3	14.84	26		London	0	0	1	0	1179	8	14.7	4.534	0	0	1			43	0	0	2.74151	0	0	23.7583	0	0	0	26
Open Access Kiosks	London (Lambeth, Southwark and Wandsworth)	0	4.3	13.26	33		London	0	0	1	0	1354	9	15	5.698	1	0	1			29	0	0	4.48403	0	0	14.0347	0	0	0	33
Open Access Kiosks	London (North East)	0	3.8	17.96	8		London	0	0	1	0	834	24	3.5	5.397	0	0	1			31	0	0	3.81323	0	0	7.99333	0	0	0	8
Open Access Kiosks	London (North)	0	4.5	12.54	35		London	0	0	1	0	1687	20	8.4	5.391	0	0	1			31	0	0	5.76145	0	0	15.4183	0	0	0	35
Open Access Kiosks	London (South East)	0	3.8	17.13	14		London	0	0	1	0	1119	14	8	4.467	1	0	1			26	0	0	3.98702	0	0	14.1639	0	0	0	14
Open Access Kiosks	London (South)	0	2	13.89	31		London	0	0	1	0	1748	41	4.3	8.583	0	0	1			23	0	0	4.71513	0	0	6.48841	0	0	0	31
Open Access Kiosks	London (West)	0	3.3	14.87	25		London	0	0	1	0	781	13	6	4.73	0	0	1			34	0	0	3.64693	0	0	22.2896	0	0	0	25
Open Access Kiosks	Manchester (Central)	0	4	14.42	28		North	1	0	0	0	1084	32	3.4	5.512	0	0	1			18	0	0	2.39478	0	0	9.082	0	0	0	28
Open Access Kiosks	Manchester (East and West)	1	3.1	20.9	2		North	1	0	0	0	1458	96	1.5	10.233	0	0	1			11	0	0	3.41933	0	0	6.24059	0	0	0	2
Open Access Kiosks	Marches	1	2	17.07	15		Midlands	0	1	0	0	1297	741	0.2	7.062	1	0	1			6	0	0	2.18918	0	0	15.6938	0	0	0	15
Open Access Kiosks	Merseyside	0	5.5	12.27	36		North	1	0	0	0	1000	64	1.6	8.258	2	0	1			6	0	0	1.61298	0	0	4.73965	0	0	0	36
Open Access Kiosks	Norfolk	0	2.3	14.9	24		South	0	0	0	1	1061	537	0.2	4.791	0	0	1			7	0	0	0.30683	0	0	11.2169	0	0	0	24
Open Access Kiosks	North East Yorkshire and the Humber	0	2.8	14.58	27		North	1	0	0	0	833	1183	0.1	10.006	0	0	1			7	0	0	2.29562	0	0	2.78133	0	0	0	27
Open Access Kiosks	Northumbria	1	3.1	10.95	40		North	1	0	0	0	1944	542	0.4	6.841	1	0	1			7	0	0	2.70136	0	0	11.0072	0	0	0	40
Open Access Kiosks	Nottinghamshire and Lincolnshire	0	2.7	17.91	10		Midlands	0	1	0	0	2622	808	0.3	10.397	0	0	1			9	0	0	0.89353	0	0	3.2721	0	0	0	10
Open Access Kiosks	South Tyne and Wear Valley	0	4.3	19.01	3		North	1	0	0	0	993	236	0.4	4.802	0	0	1			5	0	0	2.4115	0	0	13.3132	0	0	0	3
Open Access Kiosks	South Yorkshire	0	3.5	12.56	34		North	1	0	0	0	1652	155	1.1	7.845	2	0	1			10	0	0	2.07266	0	0	14.3531	0	0	0	34
Open Access Kiosks	Staffordshire	0	2.2	17.69	12		Midlands	0	1	0	0	656	271	0.2	6.501	0	0	1			7	0	0	1.66897	0	0	6.38517	0	0	0	12
Open Access Kiosks	Surrey and Sussex	0	1.5	16.99	17		South	0	0	0	1	2168	544	0.4	15.376	2	0	1			10	0	0	1.09781	0	0	3.7526	0	0	0	17
Open Access Kiosks	Tees Valley	0	4.8	11.38	38		North	1	0	0	0	1226	79	1.6	3.984	1	0	1			6	0	0	4.10392	0	0	18.6145	0	0	0	38
Open Access Kiosks	Thames Valley (Berks, Bucks, Oxfs)	0	1.4	18.49	5		South	0	0	0	1	1052	574	0.2	13.476	0	0	1			14	0	0	2.68106	0	0	3.32072	0	0	0	5
Open Access Kiosks	West Of England	0	1.7	23.5	1		South	0	0	0	1	1674	133	1.3	6.329	0	0	1			10	0	0	1.83441	0	0	5.71022	0	0	0	1
Open Access Kiosks	West Yorkshire	0	3.3	15.01	23		North	1	0	0	0	2180	203	1.1	13.065	0	0	1			16	0	0	1.41906	0	0	2.33295	0	0	0	23
Options and Choices Events	Bedfordshire and Hertfordshire	0	2	18.4	10	21	South	0	0	0	1	1221	288	0.4	10.06	10	1	1	21	21	15	0	0	1.55467	1	1.55467	3.32505	0	0	10	10
Options and Choices Events	Birmingham and Solihull	1	6.9	11.97	40	10	Midlands	0	1	0	0	1834	45	4.1	7.242	20	1	1	10	10	29	0	0	0.7636	1	0.7636	6.24827	0	0	40	40
Options and Choices Events	Black Country	0	5.4	14.93	33	46	Midlands	0	1	0	0	1636	36	4.5	6.501	14	1	1	46	46	19	0	0	5.12844	1	5.12844	4.99923	0	0	33	33
Options and Choices Events	Cambridgeshire and Suffolk	0	2	15.85	29	8	South	0	0	0	1	1639	719	0.2	8.607	6	1	1	8	8	11	0	0	1.31637	1	1.31637	4.89601	0	0	29	29
Options and Choices Events	Cheshire, Halton and Warrington	0	2.2	19.2	6	43	North	1	0	0	0	1654	234	0.7	6.067	6	1	1	43	43	4	0	0	3.57013	1	3.57013	9.15774	0	0	6	6
Options and Choices Events	Coventry and Warwickshire	0	2.9	14.76	34	9	Midlands	0	1	0	0	734	207	0.4	5.056	10	1	1	9	9	14	0	0	1.17089	1	1.17089	7.97666	0	0	34	34
Options and Choices Events	Cumbria and Lancashire	0	2.3	19.08	7		North	1	0	0	0	1212	984	0.1	11.59	13	1	1			8	0	0	1.22174	1	1.22174	2.47714	0	0	7	7
Options and Choices Events	Derbyshire	0	2.6	17.46	15	6	Midlands	0	1	0	0	825	262	0.3	5.96	8	1	1	6	6	7	0	0	1.04362	1	1.04362	12.0721	0	0	15	15
Options and Choices Events	Devon and Cornwall	0	1.7	18.49	9	20	South	0	0	0	1	684	1027	0.1	9.404	12	1	1	20	20	5	0	0	2.47554	1	2.47554	3.83879	0	0	9	9
Options and Choices Events	Dorset and Somerset	0	1.3	23.01	2	2	South	0	0	0	1	841	610	0.1	6.932	8	1	1	2	2	6	0	0	2.75534	1	2.75534	6.36757	0	0	2	2
Options and Choices Events	Essex	0	2	15.86	28	11	South	0	0	0	1	879	367	0.2	9.899	10	1	1	11	11	10	0	0	1.16173	1	1.16173	3.55793	0	0	28	28
Options and Choices Events	Gloucestershire, Wiltshire and Swindon	0	1.5	15.31	32	3	South	0	0	0	1	847	614	0.1	7.24	5	1	1	3	3	7	0	0	2.09392	1	2.09392	8.88536	0	0	32	32
Options and Choices Events	Hampshire and Isle of Wight	0	1.6	19.27	5	7	South	0	0	0	1	706	415	0.2	11.11	5	1	1	7	7	8	0	0	2.75248	1	2.75248	4.12781	0	0	5	5
Options and Choices Events	Kent	0	2.2	17.62	14	23	South	0	0	0	1	1380	374	0.4	9.63	6	1	1	23	23	9	0	0	1.26168	1	1.26168	5.66978	0	0	14	14
Options and Choices Events	Leicestershire, Rutland and Northamptonshire	0	2.5	16.17	25		Midlands	0	1	0	0	706	490	0.1	9.88	12	1	1			14	0	0	2.51518	1	2.51518	4.81174	0	0	25	25
Options and Choices Events	London (Brent, Harrow and Hillingdon)	0	3.5	15.54	31		London	0	0	1	0	900	21	4.3	4.681	8	1	1			39	0	0	2.62551	1	2.62551	7.93207	0	0	31	31
Options and Choices Events	London (Central)	0	3.6	14.31	35	13	London	0	0	1	0	1879	7	26.8	5.527	13	1	1	13	13	29	0	0	3.56432	1	3.56432	9.81907	0	0	35	35
Options and Choices Events	London (City and East)	0	7.3	13.02	39	17	London	0	0	1	0	1179	8	14.7	4.534	16	1	1	17	17	43	0	0	2.74151	1	2.74151	23.7583	0	0	39	39
Options and Choices Events	London (Lambeth, Southwark and Wandsworth)	0	4.3	13.6	37	27	London	0	0	1	0	1354	9	15	5.698	12	1	1	27	27	29	0	0	4.48403	1	4.48403	14.0347	0	0	37	37
Options and Choices Events	London (North East)	1	3.8	16.6	21		London	0	0	1	0	834	24	3.5	5.397	9	1	1			31	0	0	3.81323	1	3.81323	7.99333	0	0	21	21
Options and Choices Events	London (North)	1	4.5	16.12	26		London	0	0	1	0	1687	20	8.4	5.391	9	1	1			31	0	0	5.76145	1	5.76145	15.4183	0	0	26	26
Options and Choices Events	London (South East)	0	3.8	28.87	1		London	0	0	1	0	1119	14	8	4.467	14	1	1			26	0	0	3.98702	1	3.98702	14.1639	0	0	1	1
Options and Choices Events	London (South)	0	2	19.41	4		London	0	0	1	0	1748	41	4.3	8.583	12	1	1			23	0	0	4.71513	1	4.71513	6.48841	0	0	4	4
Options and Choices Events	London (West)	0	3.3	16.07	27		London	0	0	1	0	781	13	6	4.73	8	1	1			34	0	0	3.64693	1	3.64693	22.2896	0	0	27	27
Options and Choices Events	Manchester (Central)	0	4	16.46	22	42	North	1	0	0	0	1084	32	3.4	5.512	16	1	1	42	42	18	0	0	2.39478	1	2.39478	9.082	0	0	22	22
Options and Choices Events	Manchester (East and West)	0	3.1	17.73	12	37	North	1	0	0	0	1458	96	1.5	10.233	14	1	1	37	37	11	0	0	3.41933	1	3.41933	6.24059	0	0	12	12
Options and Choices Events	Marches	0	2	17.97	11	32	Midlands	0	1	0	0	1297	741	0.2	7.062	11	1	1	32	32	6	0	0	2.18918	1	2.18918	15.6938	0	0	11	11
Options and Choices Events	Merseyside	0	5.5	13.54	38		North	1	0	0	0	1000	64	1.6	8.258	14	1	1			6	0	0	1.61298	1	1.61298	4.73965	0	0	38	38
Options and Choices Events	Norfolk	0	2.3	17.19	18	39	South	0	0	0	1	1061	537	0.2	4.791	5	1	1	39	39	7	0	0	0.30683	1	0.30683	11.2169	0	0	18	18
Options and Choices Events	North East Yorkshire and the Humber	0	2.8	16.23	24	18	North	1	0	0	0	833	1183	0.1	10.006	5	1	1	18	18	7	0	0	2.29562	1	2.29562	2.78133	0	0	24	24
Options and Choices Events	Northumbria	0	3.1	16.24	23	28	North	1	0	0	0	1944	542	0.4	6.841	20	1	1	28	28	7	0	0	2.70136	1	2.70136	11.0072	0	0	23	23
Options and Choices Events	Nottinghamshire and Lincolnshire	0	2.7	17.02	19		Midlands	0	1	0	0	2622	808	0.3	10.397	13	1	1			9	0	0	0.89353	1	0.89353	3.2721	0	0	19	19
Options and Choices Events	South Tyne and Wear Valley	0	4.3	17.02	20	41	North	1	0	0	0	993	236	0.4	4.802	11	1	1	41	41	5	0	0	2.4115	1	2.4115	13.3132	0	0	20	20
Options and Choices Events	South Yorkshire	0	3.5	17.31	17	47	North	1	0	0	0	1652	155	1.1	7.845	14	1	1	47	47	10	0	0	2.07266	1	2.07266	14.3531	0	0	17	17
Options and Choices Events	Staffordshire	0	2.2	20.32	3	36	Midlands	0	1	0	0	656	271	0.2	6.501	5	1	1	36	36	7	0	0	1.66897	1	1.66897	6.38517	0	0	3	3
Options and Choices Events	Surrey and Sussex	0	1.5	15.65	30	5	South	0	0	0	1	2168	544	0.4	15.376	10	1	1	5	5	10	0	0	1.09781	1	1.09781	3.7526	0	0	30	30
Options and Choices Events	Tees Valley	0	4.8	13.63	36	29	North	1	0	0	0	1226	79	1.6	3.984	9	1	1	29	29	6	0	0	4.10392	1	4.10392	18.6145	0	0	36	36
Options and Choices Events	Thames Valley (Berks, Bucks, Oxfs)	0	1.4	17.46	16	14	South	0	0	0	1	1052	574	0.2	13.476	10	1	1	14	14	14	0	0	2.68106	1	2.68106	3.32072	0	0	16	16
Options and Choices Events	West Of England	0	1.7	18.84	8	1	South	0	0	0	1	1674	133	1.3	6.329	8	1	1	1	1	10	0	0	1.83441	1	1.83441	5.71022	0	0	8	8
[truncated: 721 more rows]
